# Supplementary material for: Comprehensive analyses of 723 transcriptomes enhance genetic and biological interpretations for complex traits in cattle
Source: HighWire-hosted journal article supplement (doi:10.1101/gr.250704.119), 2020-05-01
Supplement: Supplemental_files.zip [file Supplemental_Fig_S2.pdf.pdf › Supplemental_Fig_S2.pdf.pdf]

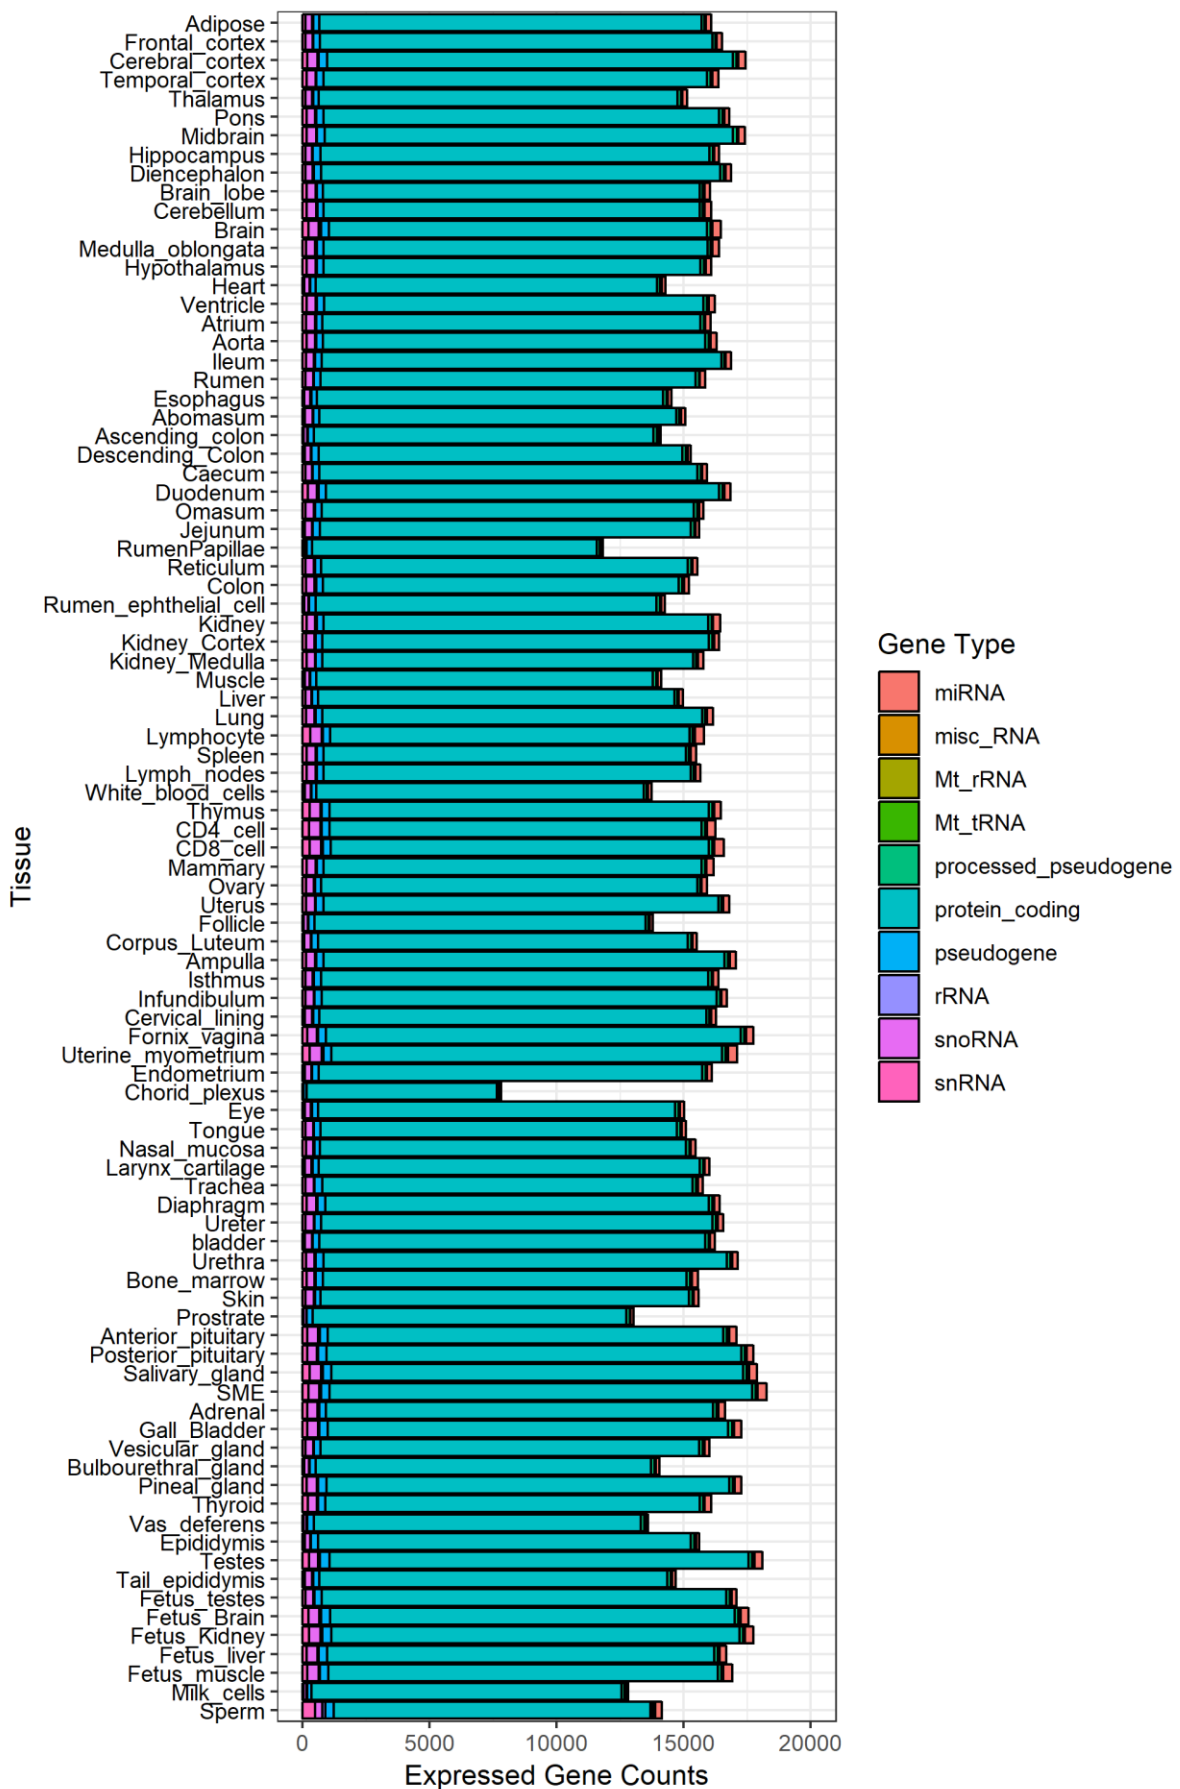

**Supplemental Figure S2. Number of expressed genes across 91 tissues and cell types in cattle.** Counts of expressed genes (all annotated Ensembl genes in UMD3.1.1; Fragments Per Kilobase per Million mapped reads (FPKM) > 0) across all 91 tissues and cell types. For tissues and cell types with multiple samples, we calculate the mean of expressed genes among all these samples.
