# Supplementary material for: Comprehensive analyses of 723 transcriptomes enhance genetic and biological interpretations for complex traits in cattle
Source: HighWire-hosted journal article supplement (doi:10.1101/gr.250704.119), 2020-05-01
Supplement: Supplemental_files.zip [file Supplemental_Fig_S3.pdf.pdf › Supplemental_Fig_S3.pdf.pdf]

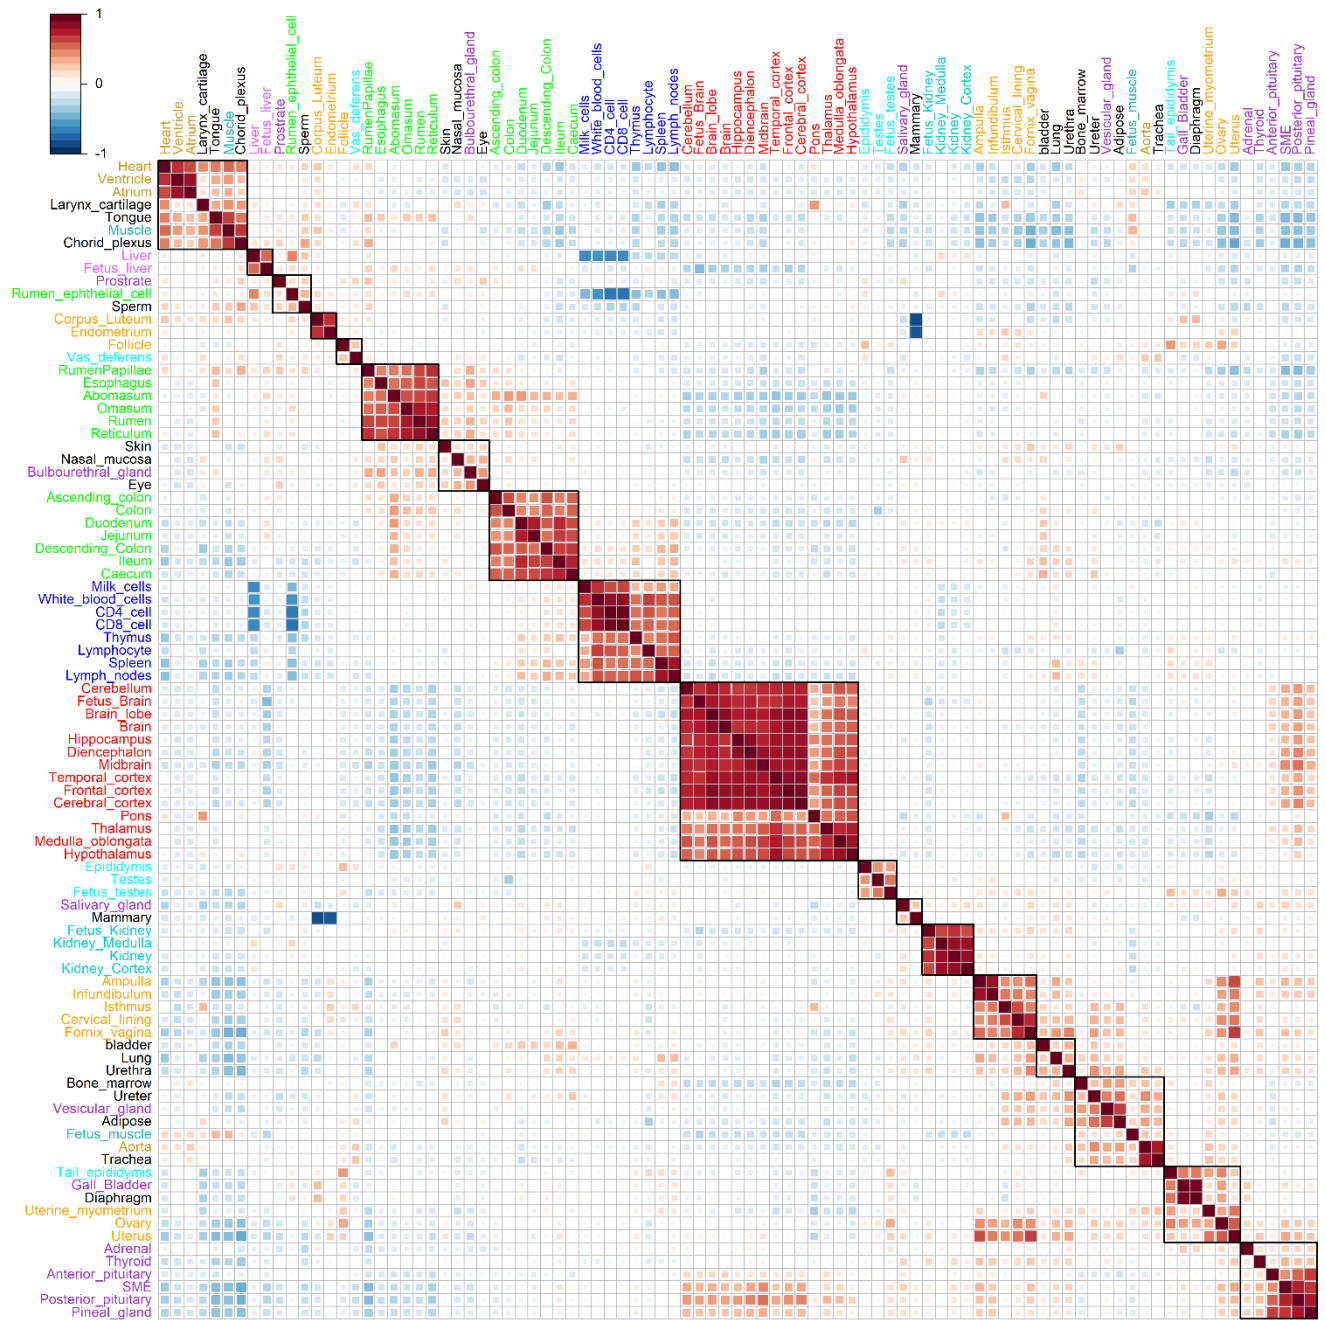

**Supplemental Figure S3. Correlation clustering of 91 tissues and cell types based on  $t$ -statistics of their genes.** The color corresponds to correlation coefficients.
