# Supplementary material for: Comprehensive analyses of 723 transcriptomes enhance genetic and biological interpretations for complex traits in cattle
Source: HighWire-hosted journal article supplement (doi:10.1101/gr.250704.119), 2020-05-01
Supplement: Supplemental_files.zip [file Supplemental_Fig_S4.pdf.pdf › Supplemental_Fig_S4.pdf.pdf]

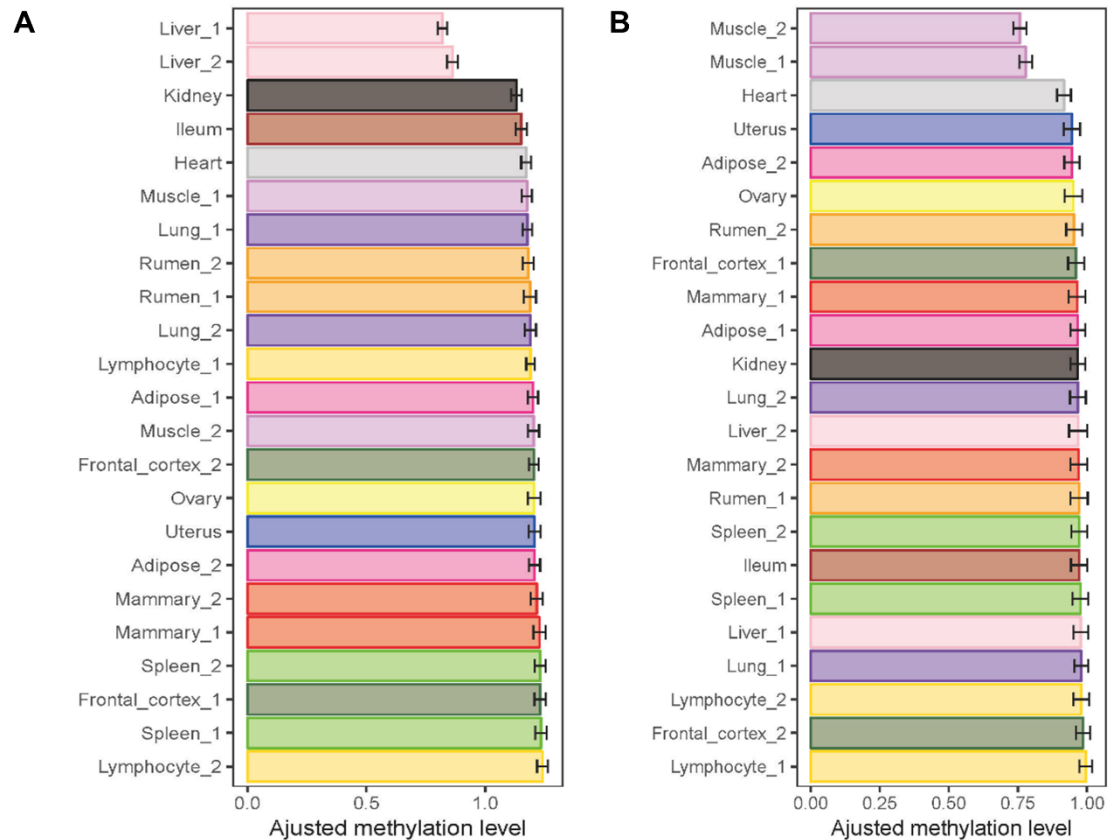

**Supplemental Figure S4. Promoter DNA methylation levels for liver- (A) and muscle-specific (B) genes across 14 major tissues.** We determined the adjusted promoter (i.e., 1500bp upstream and 500bp downstream of the transcriptional start sites, TSS) methylation in a tissue as the promoter methylation level divided by the averaged methylation level over the entire genome in this particular tissue.
