# Supplementary material for: Comprehensive analyses of 723 transcriptomes enhance genetic and biological interpretations for complex traits in cattle
Source: HighWire-hosted journal article supplement (doi:10.1101/gr.250704.119), 2020-05-01
Supplement: Supplemental_files.zip [file Supplemental_Fig_S5.pdf.pdf › Supplemental_Fig_S5.pdf.pdf]

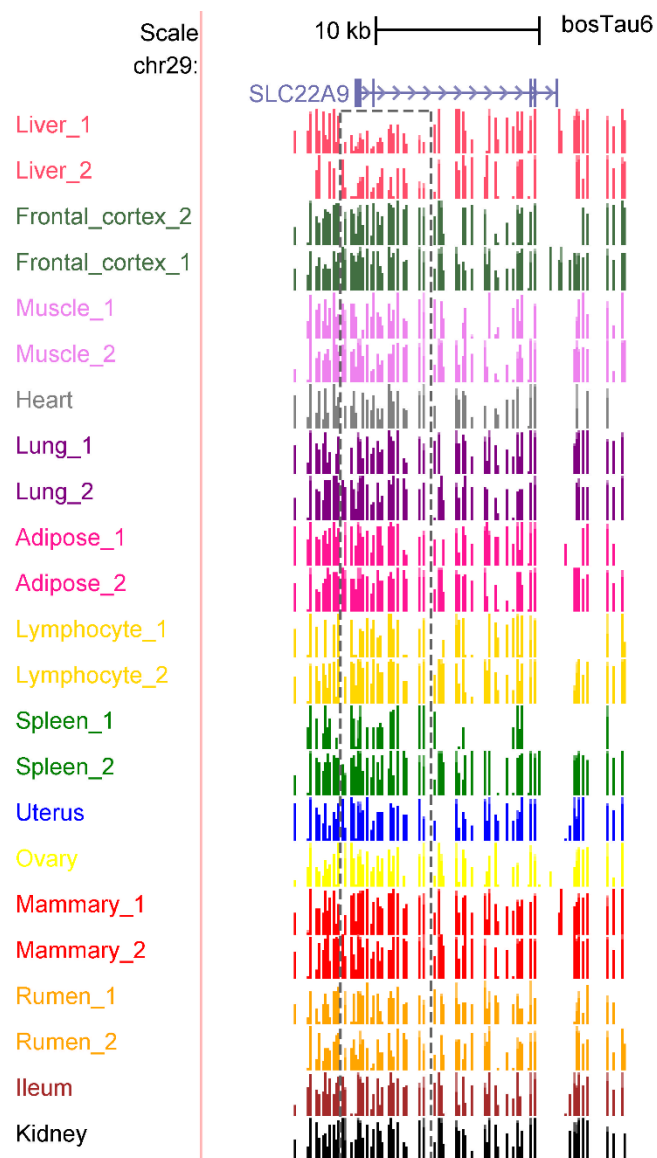

**Supplemental Figure S5. The DNA methylation levels ( $\beta$  value) of SLC22A9 gene across 14 somatic tissues in cattle.** The black dashed box shows the promoter of SLC22A9, which is highly specifically expressed in liver.
