# Supplementary material for: Comprehensive analyses of 723 transcriptomes enhance genetic and biological interpretations for complex traits in cattle
Source: HighWire-hosted journal article supplement (doi:10.1101/gr.250704.119), 2020-05-01
Supplement: Supplemental_files.zip [file Supplemental_Fig_S8.pdf.pdf › Supplemental_Fig_S8.pdf.pdf]

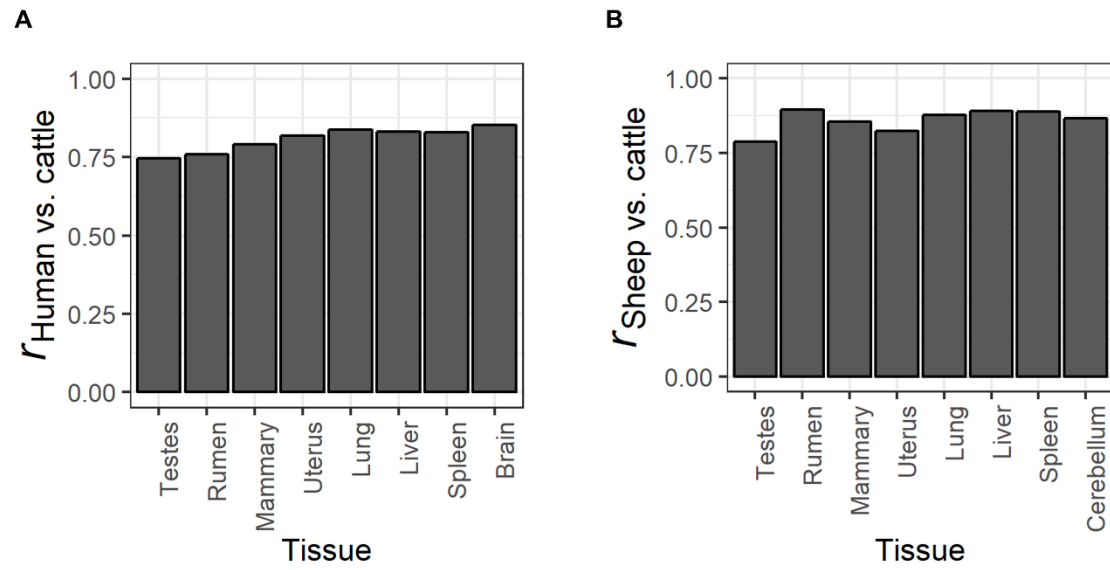

**Supplemental Figure S8. Correlation of orthologues genes expression across eight major tissues in human vs. cattle (left) and sheep vs. cattle (right), respectively. The human stomach matches with the cattle rumen.**
