# Supplementary material for: Comprehensive analyses of 723 transcriptomes enhance genetic and biological interpretations for complex traits in cattle
Source: HighWire-hosted journal article supplement (doi:10.1101/gr.250704.119), 2020-05-01
Supplement: Supplemental_files.zip [file Supplemental_Fig_S9.pdf.pdf › Supplemental_Fig_S9.pdf.pdf]

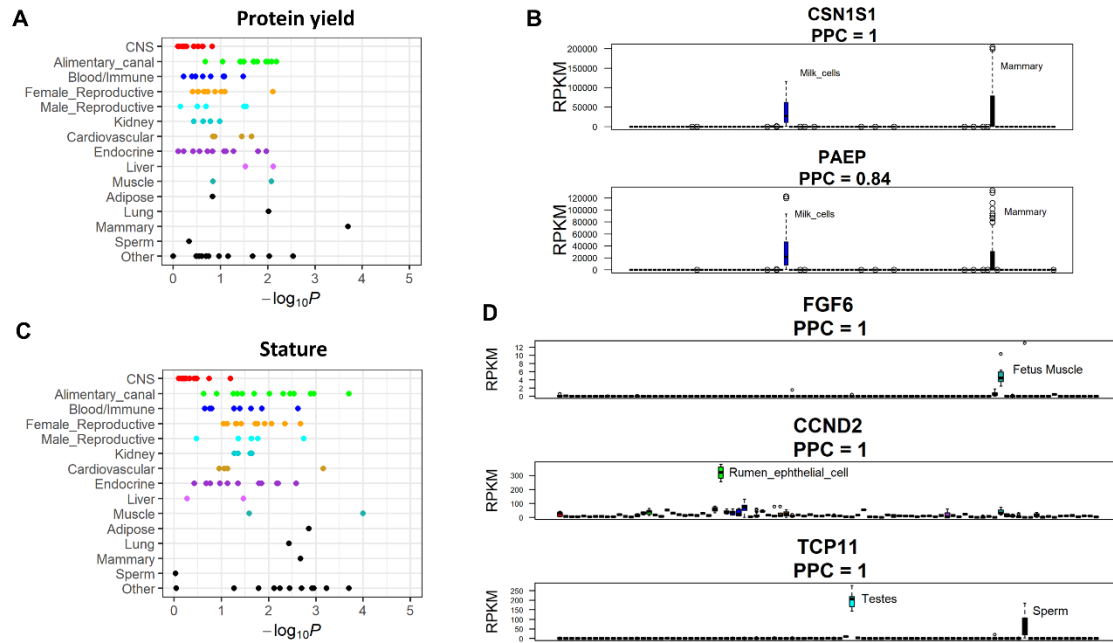

**Supplemental Figure S9. GWAS signal enrichments of protein yield and stature across the 91 tissues and cell types.** **A** GWAS signal enrichments for protein yield across the 91 tissues and cell types. **B** The expression patterns of two fine-mapped genes, *CSN1S1* (posterior probability of causality (PPC) = 1) and *PAEP* (PPC = 0.84), for protein yield. **C** GWAS signal enrichments for stature across the 91 tissues and cell types. **D** The expression patterns of three fine-mapped genes, *FGF6* (PPC = 1), *CCND2* (PPC = 1), and *TCP11* (PPC = 1) for stature.
