# Supplementary material for: Comprehensive analyses of 723 transcriptomes enhance genetic and biological interpretations for complex traits in cattle
Source: HighWire-hosted journal article supplement (doi:10.1101/gr.250704.119), 2020-05-01
Supplement: Supplemental_files.zip [file Supplemental_Fig_S10.pdf.pdf › Supplemental_Fig_S10.pdf.pdf]

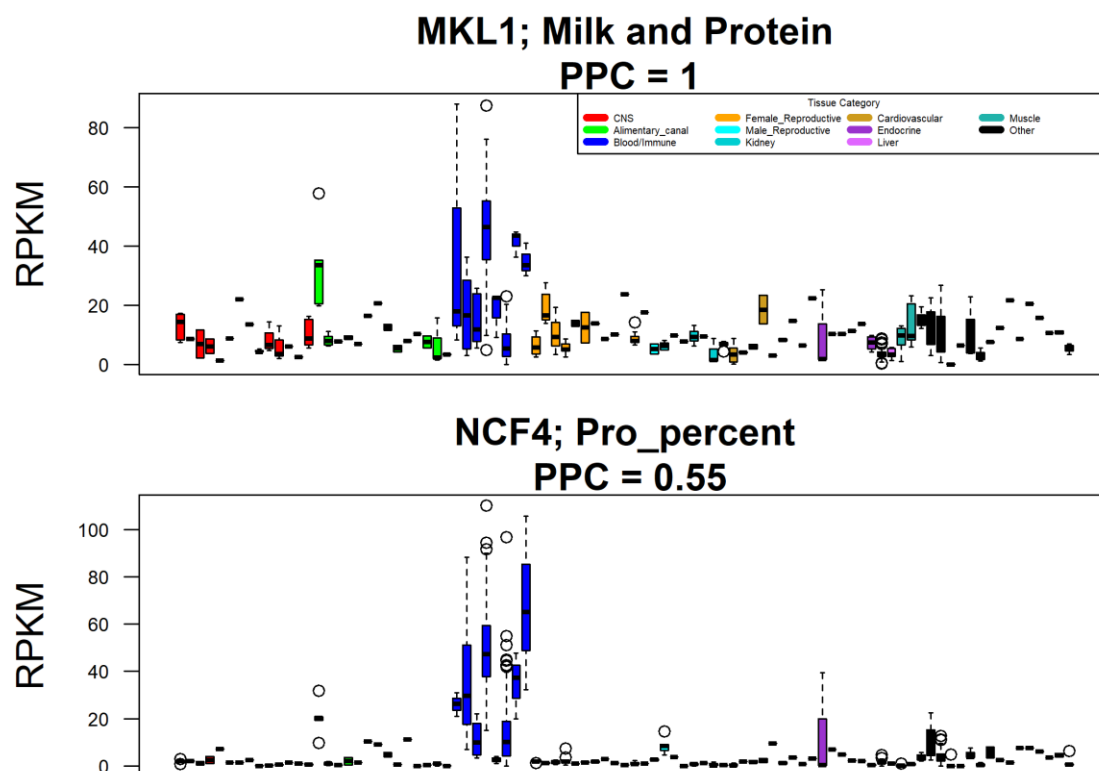

**Supplemental Figure S10.** The expression patterns of two fine-mapped genes for milk and protein yields (*MKL1*, posterior probability of causality, PPC = 1), and protein percentage (*NCF6*, PPC = 0.55) across 91 tissues and cell types in cattle.
