# Supplementary material for: Comprehensive analyses of 723 transcriptomes enhance genetic and biological interpretations for complex traits in cattle
Source: HighWire-hosted journal article supplement (doi:10.1101/gr.250704.119), 2020-05-01
Supplement: Supplemental_files.zip [file Supplemental_Fig_S11.pdf.pdf › Supplemental_Fig_S11.pdf.pdf]

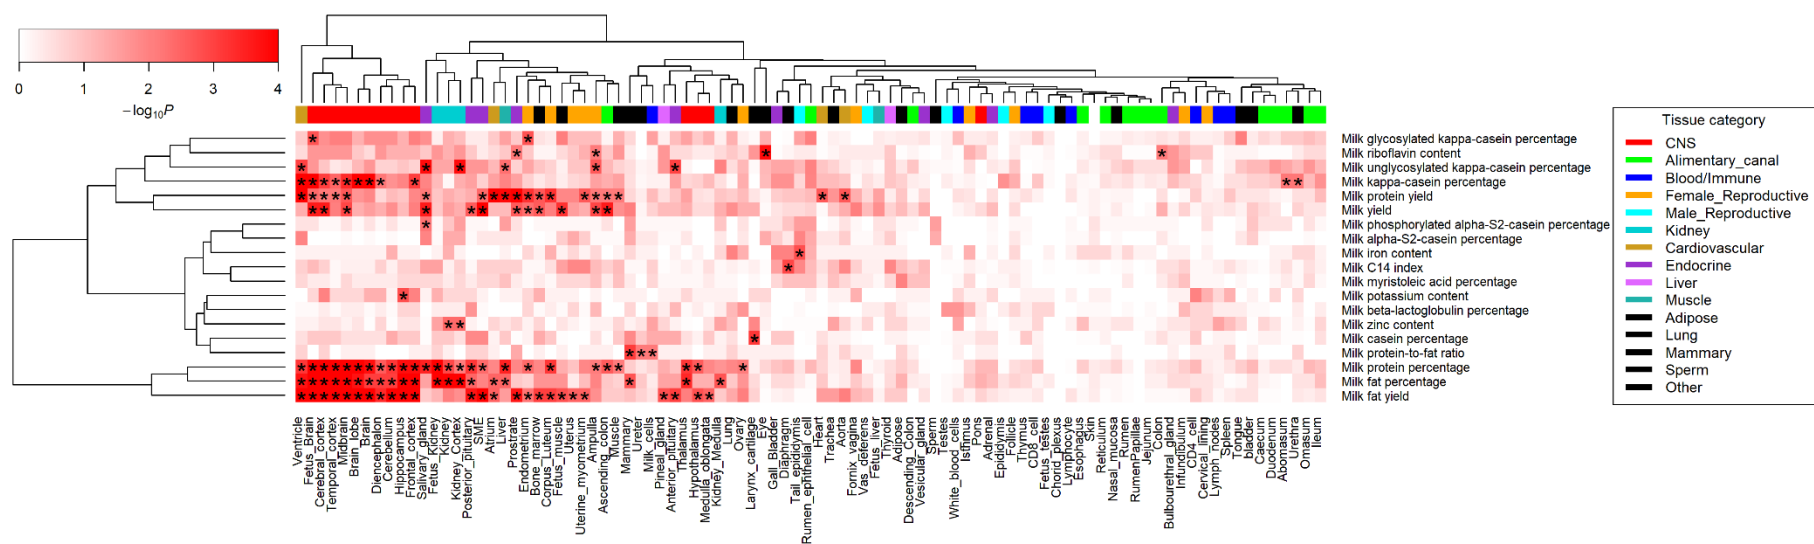

**Supplemental Figure S11. Tissue-specific gene enrichment analysis using trait-associated genes from cattle QTLdb.** The color corresponds to the enrichment degree ( $-\log_{10}P$ ), which is computed by a hypergeometric test. The “\*” denotes  $FDR < 0.05$ .
