# Supplementary material for: Comprehensive analyses of 723 transcriptomes enhance genetic and biological interpretations for complex traits in cattle
Source: HighWire-hosted journal article supplement (doi:10.1101/gr.250704.119), 2020-05-01
Supplement: Supplemental_files.zip [file Supplemental_Fig_S12.pdf.pdf › Supplemental_Fig_S12.pdf.pdf]

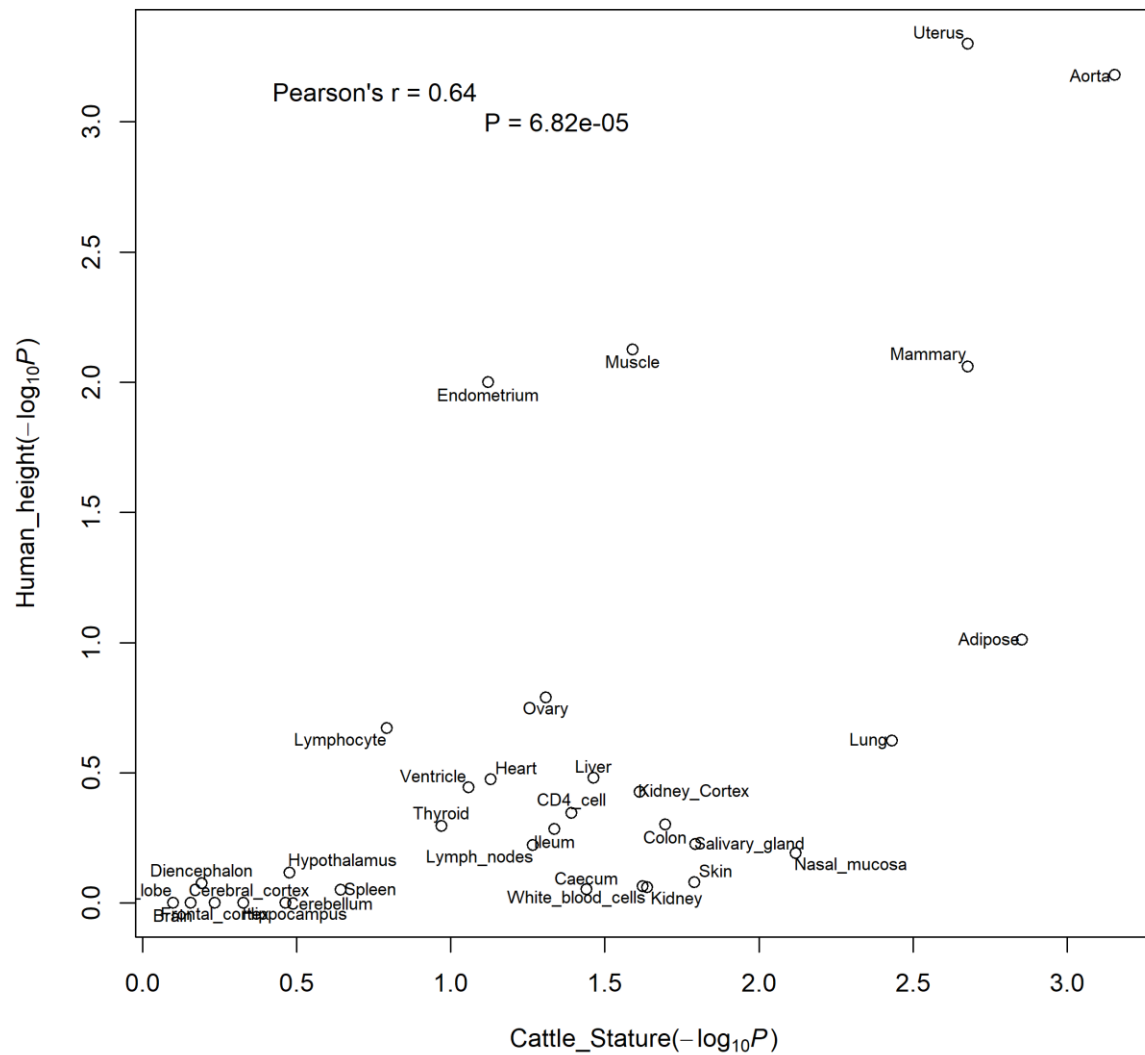

**Supplemental Figure S12. Comparison of GWAS signal enrichments of cattle stature and heritability enrichments of human height (LDSC) across 33 major tissues.**
