# Supplementary material for: Comprehensive analyses of 723 transcriptomes enhance genetic and biological interpretations for complex traits in cattle
Source: HighWire-hosted journal article supplement (doi:10.1101/gr.250704.119), 2020-05-01
Supplement: Supplemental_files.zip [file Supplemental_Fig_S15.pdf.pdf › Supplemental_Fig_S15.pdf.pdf]

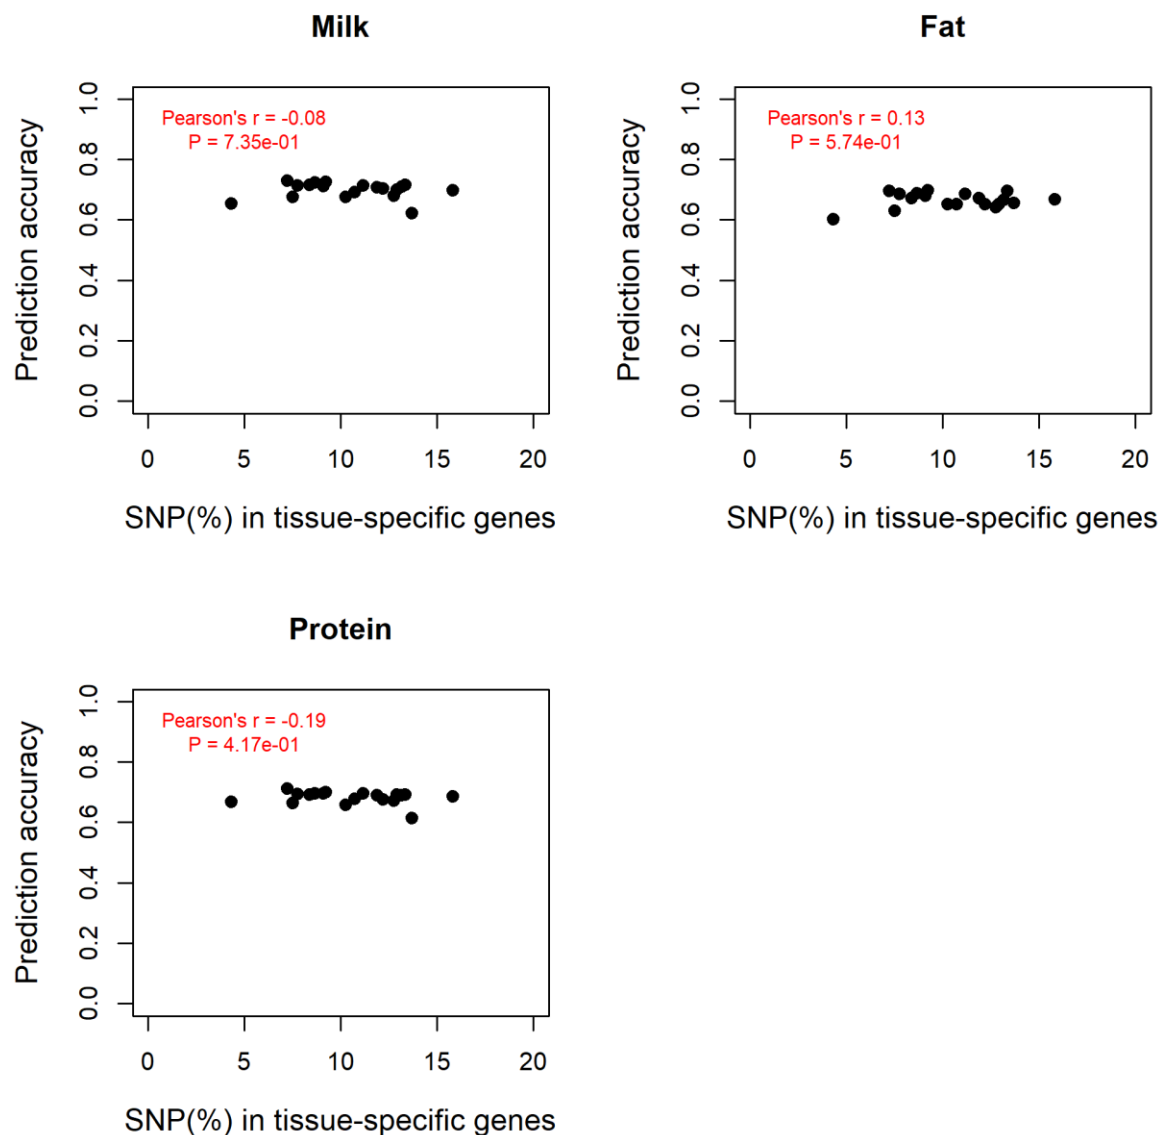

**Supplemental Figure S15. The correlations between SNP-set size of category-specific genes (x-axis) and prediction accuracy of the corresponding two-component prediction model (y-axis).** We compute the percentage (%) of SNPs as the number of SNPs within category (tissue)-specific genes divided by the total number of SNPs being analysed.
