# Supplementary material for: Comprehensive analyses of 723 transcriptomes enhance genetic and biological interpretations for complex traits in cattle
Source: HighWire-hosted journal article supplement (doi:10.1101/gr.250704.119), 2020-05-01
Supplement: Supplemental_files.zip [file Supplemental_Fig_S16.pdf.pdf › Supplemental_Fig_S16.pdf.pdf]

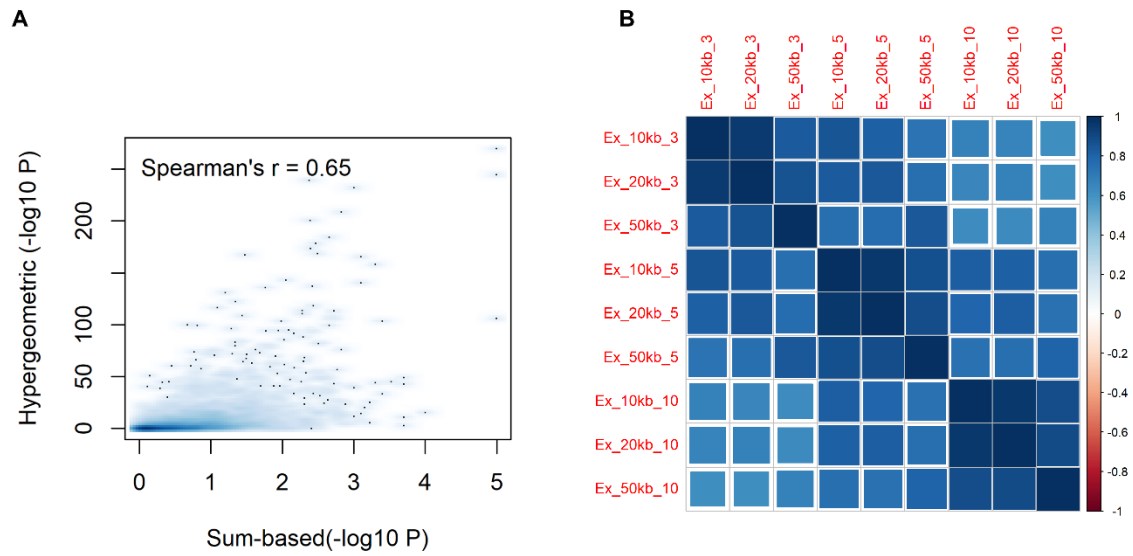

**Supplemental Figure S16. Correlations of GWAS signal enrichments ( $-\log_{10}P$ ) for 45 complex traits from different methods and cut-offs.** **A** Correlation between sum-based method and hypergeometric (count-based) test. **B** Correlations between different cut-offs of gene extension ( $\pm 10\text{kb}$ ,  $\pm 20\text{kb}$ ,  $\pm 50\text{kb}$ ) and top percentages (3%, 5% and 10%) used for defining tissue-specific genes.
