# Supplementary material for: Comprehensive analyses of 723 transcriptomes enhance genetic and biological interpretations for complex traits in cattle
Source: HighWire-hosted journal article supplement (doi:10.1101/gr.250704.119), 2020-05-01
Supplement: Supplemental_files.zip [file Supplemental_Table_S1.xlsx.xlsx]

## Sheet: RNA-seq experiments
Supplemental Table S1 The summary list of RNA-seq datasets used in this study
Study discribtion	# tissue types	#individuals	#RNA-seq	RNA-seq Technology	Clean data (total # reads)	Average mapping rate	Accession Number	Website	ref.	Note
94 RNAseq of Hereford cow	68	1	94	100bp single-end	3595638687	0.9675	GSE128075	Current study
6 Rumen epithelial primary cells of Holstein	1	1	6	150bp paired-end	84152461	0.9046	GSE129423	https://www.ncbi.nlm.nih.gov/bioproject/?term=GSE129423	https://bmcbiol.biomedcentral.com/articles/10.1186/s12915-019-0687-8
51 RNAseq of Holstein	14	6	51	150bp paired-end	1246016065	0.9268	GSE137943, GSE148707	Current study
5 Sperm of Holstein	1	2	5	150bp paired-end	493122129	0.87	GSE131851	https://www.ncbi.nlm.nih.gov/bioproject/?term=GSE131851	https://www.mdpi.com/2075-4655/3/4/21
18 tissues x 3 individual of Holstein	18	1	54	100bp paired-end	1139140546	0.94645	SRP042639	https://www.ncbi.nlm.nih.gov/sra/SRP042639	1. https://journals.plos.org/plosone/article?id=10.1371/journal.pone.0141225; 2. https://bmcgenomics.biomedcentral.com/articles/10.1186/s12864-018-4902-8
9 tissue x 3 individuals of Holstein	9	3	27	80bp paired-end	1315831508	0.903837	PRJNA177791	https://www.ncbi.nlm.nih.gov/bioproject/PRJNA177791/	https://www.ncbi.nlm.nih.gov/pubmed/23258891
23 tissues for Hereford	23	1	24	75bp paired-end	1138514798	0.9428	PRJNA379574	https://www.ncbi.nlm.nih.gov/bioproject/?term=PRJNA379574
12 mammary gland of Holstein	1	12	12	150bp paired-end	839970510	0.919467	PRJNA416150	https://www.ncbi.nlm.nih.gov/nuccore?term=PRJNA416150	https://www.frontiersin.org/articles/10.3389/fgene.2018.00281/full
257 white blood cells and milk cells of Holstein	2	257	257	150bp paired-end	1599798167	0.9523	PRJNA305942	https://www.ncbi.nlm.nih.gov/bioproject/PRJNA305942/	1. https://bmcgenomics.biomedcentral.com/articles/10.1186/s12864-018-4800-0; 2. https://bmcgenomics.biomedcentral.com/articles/10.1186/s12864-018-4902-8
58 milk cells, white blood cells, mammary tissue and liver	4	58	58	100bp paired-end	1399302846	0.9635	SRP111067; PRJNA392196	https://www.ncbi.nlm.nih.gov/sra/SRP111067	https://bmcgenomics.biomedcentral.com/articles/10.1186/s12864-018-4902-8
60 mammary gland of Holstein	1	60	60	150bp single-end	2034541092	0.935307	PRJNA428884	https://www.ncbi.nlm.nih.gov/bioproject/428884	https://www.nature.com/articles/s41598-018-29420-8
14 Endometrium+12 Corpus Luteum data	2	25	25	150bp paired-end	997747116	0.9455	PRJNA298914	https://www.ncbi.nlm.nih.gov/bioproject/?term=PRJNA298914	https://academic.oup.com/biolreprod/article-lookup/doi/10.1095/biolreprod.115.132951
9 RNA-seq (3 CD4 cells +3 CD8 cells +3 Liver)	3	3	9	150bp paired-end	2219748281	0.971	PRJEB27455	https://www.ebi.ac.uk/ena/data/view/PRJEB27455	https://www.biorxiv.org/content/biorxiv/early/2018/07/31/316091.full.pdf
32 fetal brain, kidney, liver and muscle	4	8	32	100bp single-end	1436839285	0.9662	PRJNA268096	https://www.ncbi.nlm.nih.gov/bioproject/?term=PRJNA268096	https://www.pnas.org/content/112/15/4618.long
9 mammary gland of Holstein	9	9	9	100bp paired-end	243594137	0.9741	PRJNA446068	https://www.ncbi.nlm.nih.gov/bioproject/?term=PRJNA446068	https://www.ncbi.nlm.nih.gov/pmc/articles/PMC6380278/
Total	91	447	723		19783957628	0.939291

## Sheet: Summary of individual samples
Sample_ID	Individual_ID	Details of Tissues	Tissue	Tissue_categotry	Sex	Age	Study	Clean data (# reads)	Mapping rate	Notes
E1_ADIP3770	1	Adipose	Adipose	Adipose	M	3	1	19943894	0.9298	Study 1 inculded 47+4 samples newly generated in the current study
E1_ADIP3773	2	Adipose	Adipose	Adipose	M	3	1	19963376	0.9267
E1_ADIP3842	3	Adipose	Adipose	Adipose	F	3	1	21209232	0.9281
E1_ADIP3886	4	Adipose	Adipose	Adipose	F	3	1	22709959	0.9267
E1_FRON3770	1	Frontal_cortex	Frontal_cortex	CNS	M	3	1	19367076	0.8806
E1_FRON3773	2	Frontal_cortex	Frontal_cortex	CNS	M	3	1	21041819	0.9151
E1_FRON3842	3	Frontal_cortex	Frontal_cortex	CNS	F	3	1	20332667	0.9266
E1_FRON3886	4	Frontal_cortex	Frontal_cortex	CNS	F	3	1	22959138	0.9291
E1_HEAR3770	1	Heart	Heart	Cardiovascular	M	3	1	21343384	0.9354
E1_HEAR3773	2	Heart	Heart	Cardiovascular	M	3	1	20491656	0.9306
E1_HEAR3842	3	Heart	Heart	Cardiovascular	F	3	1	20359530	0.928
E1_HEAR3886	4	Heart	Heart	Cardiovascular	F	3	1	25042695	0.9334
E1_ILEU3770	1	Ileum	Ileum	Alimentary_canal	M	3	1	21249530	0.9295
E1_ILEU3773	2	Ileum	Ileum	Alimentary_canal	M	3	1	22135411	0.9129
E1_ILEU3842	3	Ileum	Ileum	Alimentary_canal	F	3	1	19425544	0.9269
E1_ILEU3886	4	Ileum	Ileum	Alimentary_canal	F	3	1	19880186	0.9109
E1_KIDN3770	1	Kidney	Kidney	Kidney	M	3	1	22111034	0.9019
E1_KIDN3773	2	Kidney	Kidney	Kidney	M	3	1	22728409	0.8999
E1_KIDN3842	3	Kidney	Kidney	Kidney	F	3	1	37270130	0.9385
E1_KIDN3886	4	Kidney	Kidney	Kidney	F	3	1	24715321	0.9339
E1_LDOR3770	1	Muscle	Muscle	Muscle	M	3	1	19771977	0.9322
E1_LDOR3773	2	Muscle	Muscle	Muscle	M	3	1	22623549	0.9435
E1_LDOR3842	3	Muscle	Muscle	Muscle	F	3	1	27563356	0.9316
E1_LDOR3886	4	Muscle	Muscle	Muscle	F	3	1	21900080	0.9282
E1_LIVE3770	1	Liver	Liver	Liver	M	3	1	20463261	0.9321
E1_LIVE3773	2	Liver	Liver	Liver	M	3	1	20552358	0.9244
E1_LIVE3842	3	Liver	Liver	Liver	F	3	1	26083745	0.9389
E1_LIVE3886	4	Liver	Liver	Liver	F	3	1	20462770	0.9343
E1_LUNG3770	1	Lung	Lung	Lung	M	3	1	21490545	0.9429
E1_LUNG3773	2	Lung	Lung	Lung	M	3	1	20812731	0.9342
E1_LUNG3842	3	Lung	Lung	Lung	F	3	1	19964581	0.9319
E1_LUNG3886	4	Lung	Lung	Lung	F	3	1	22209732	0.9202
E1_LYMP4254	5	Lymphocyte	Lymphocyte	Blood/Immune	M	3	1	22468555	0.9132
E1_MAMP3842	3	Mammary_L	Mammary	Mammary	F	3	1	26510904	0.9212
E1_MAMP3886	4	Mammary_D	Mammary	Mammary	F	3	1	24974440	0.8959
E1_OVAR3842	3	Ovary	Ovary	Female_Reproductive	F	3	1	24139018	0.9264
E1_OVAR3886	4	Ovary	Ovary	Female_Reproductive	F	3	1	25839254	0.9166
E1_RUME3770	1	Rumen	Rumen	Alimentary_canal	M	3	1	22036541	0.9191
E1_RUME3773	2	Rumen	Rumen	Alimentary_canal	M	3	1	22151866	0.9326
E1_RUME3842	3	Rumen	Rumen	Alimentary_canal	F	3	1	20552164	0.9307
E1_RUME3886	4	Rumen	Rumen	Alimentary_canal	F	3	1	24977897	0.9161
E1_SPLE3770	1	Spleen	Spleen	Blood/Immune	M	3	1	22036624	0.9246
E1_SPLE3773	2	Spleen	Spleen	Blood/Immune	M	3	1	27205195	0.9164
E1_SPLE3842	3	Spleen	Spleen	Blood/Immune	F	3	1	19790745	0.9175
E1_SPLE3886	4	Spleen	Spleen	Blood/Immune	F	3	1	19697063	0.9056
E1_UTER3842	3	Uterus	Uterus	Female_Reproductive	F	3	1	22456878	0.9072
E1_UTER3886	4	Uterus	Uterus	Female_Reproductive	F	3	1	21363497	0.8895
E1_3842Mamdup	3	Mammary_L	Mammary	Mammary	F	3	1	49125957	0.9682
E1_3886Mamdup	4	Mammary_D	Mammary	Mammary	F	3	1	52092592	0.9756
E1_4091Lym	6	Lymphocyte	Lymphocyte	Blood/Immune	F	3	1	39220495	0.9696
E1_4254Lym	5	Lymphocyte	Lymphocyte	Blood/Immune	F	3	1	51197704	0.9803
E2_LJA143	7	Mammary_L	Mammary	Mammary	F	11	2	14925455	0.9204	Study 2 include 94 RNAseq of Hereford newly generated in the current study
E2_LJA156	7	Chorid_plexus	Chorid_plexus	Other	F	11	2	927570	0.9625
E2_LJA157	7	prostrate	Prostrate	Endocrine	F	11	2	25870895	0.9678
E2_LJA158	7	vas_deferens	Vas_deferens	Male_Reproductive	M	11	2	39705128	0.9686
E2_LJA159	7	Mammary_gland_fat	Mammary	Mammary	F	11	2	6678654	0.9777
E2_LJA160	7	normal_outer_eye_layer_1cm_from_cancer_eye	Eye	Other	F	11	2	36262472	0.9732
E2_LJA161	7	Follicle_1	Follicle	Female_Reproductive	F	11	2	4066108	0.9502
E2_LJA162	7	corpos_epididymis	Epididymis	Male_Reproductive	M	11	2	11644758	0.9748
E2_LJA163	7	caput_epididymis	Epididymis	Male_Reproductive	M	11	2	9454217	0.9715
E2_LJA167	7	Super_bull_testis	Testes	Male_Reproductive	M	11	2	8731679	0.9762
E2_LJA168	7	fetal_testis	Fetus_testes	Male_Reproductive	M	11	2	28539285	0.9627
E2_LJA201	7	Tongue_superficial	Tongue	Other	F	11	2	30815574	0.9705
E2_LJA202	7	Internal_tongue_muscle	Tongue	Other	F	11	2	15710407	0.9734
E2_LJA203	7	Nasal_mucosa	Nasal_mucosa	Other	F	11	2	62868353	0.9754
E2_LJA204a	7	Larynx_cartilage	Larynx_cartilage	Other	F	11	2	56623521	0.9771
E2_LJA204b	7	Trachea	Trachea	Other	F	11	2	13075866	0.9607
E2_LJA205	7	Lymph_nodes	Lymph_nodes	Blood/Immune	F	11	2	48498692	0.9747
E2_LJA206	7	Anterior_pituitary	Anterior_pituitary	Endocrine	F	11	2	40981593	0.9746
E2_LJA207	7	Posterior_pituitary	Posterior_pituitary	Endocrine	F	11	2	55616639	0.9435
E2_LJA209a	7	SalivaryGland	Salivary_gland	Endocrine	F	11	2	96381318	0.9797
E2_LJA212	7	SME_pituitary_stalk_median_eminence	SME	Endocrine	F	11	2	49381233	0.9786
E2_LJA215	7	Pigment_epithelium_eye	Eye	Other	F	11	2	140486837	0.9647
E2_LJA218	7	Cerebral_cortex	Cerebral_cortex	CNS	F	11	2	63278316	0.9753
E2_LJA219	7	Frontal_cortex	Frontal_cortex	CNS	F	11	2	68814662	0.9741
E2_LJA220	7	Temporal_cortex	Temporal_cortex	CNS	F	11	2	65981535	0.9766
E2_LJA222	7	Thalamus	Thalamus	CNS	F	11	2	34765582	0.9797
E2_LJA224	7	Pons	Pons	CNS	F	11	2	24401718	0.9743
E2_LJA228	7	Kidney_Cortex	Kidney_Cortex	Kidney	F	11	2	11981097	0.9742
E2_LJA229	7	Kidney_Medulla	Kidney_Medulla	Kidney	F	11	2	15710407	0.9734
E2_LJA230	7	Adrenal	Adrenal	Endocrine	F	11	2	68346692	0.9797
E2_LJA232a	7	Sub_cutaneous_Fat	Adipose	Adipose	F	11	2	24386785	0.9725
E2_LJA233	7	KPH_fat	Adipose	Adipose	F	11	2	46620698	0.9788
E2_LJA234b	7	left_Lung	Lung	Lung	F	11	2	45069827	0.951
E2_LJA235	7	Ventricle	Ventricle	Cardiovascular	F	11	2	40006563	0.9765
E2_LJA236	7	Atrium	Atrium	Cardiovascular	F	11	2	15966980	0.9761
E2_LJA237	7	Aorta	Aorta	Cardiovascular	F	11	2	47480903	0.976
E2_LJA239	7	Esophagus	Esophagus	Alimentary_canal	F	11	2	44748892	0.974
E2_LJA240	7	Liver	Liver	Liver	F	11	2	48667165	0.9748
E2_LJA241	7	Gall_Bladder	Gall_Bladder	Endocrine	F	11	2	10640686	0.975
E2_LJA243	7	Diaphragm	Diaphragm	Other	F	11	2	19460296	0.9751
E2_LJA244	7	CorpusLuteum	Corpus_Luteum	Female_Reproductive	F	11	2	90514983	0.9754
E2_LJA248	7	uterine_endometrium_caruncular	Uterus	Female_Reproductive	F	11	2	43947535	0.9759
E2_LJA249	7	uterine_endometrium_intercaruncular_ipsilateral_CL	Uterus	Female_Reproductive	F	11	2	42278729	0.9816
E2_LJA250a	7	uterine_endometrium_intercaruncular_contralateral_CL	Uterus	Female_Reproductive	F	11	2	110399221	0.9757
E2_LJA251	7	ampulla_ipsilateral_CL	Ampulla	Female_Reproductive	F	11	2	34303057	0.9748
E2_LJA252a	7	ampulla_contralateral_CL	Ampulla	Female_Reproductive	F	11	2	25623240	0.9749
E2_LJA253	7	isthmus_ipsilateral_CL	Isthmus	Female_Reproductive	F	11	2	32492701	0.9762
E2_LJA254	7	isthmus_contralateral_CL	Isthmus	Female_Reproductive	F	11	2	42230124	0.9731
E2_LJA255	7	infundibulum_ipsilateral_CL	Infundibulum	Female_Reproductive	F	11	2	44371479	0.9689
E2_LJA256	7	Infundibulum_contralateral_CL	Infundibulum	Female_Reproductive	F	11	2	25954391	0.9762
E2_LJA257	7	Uterine_myometrium	Uterus	Female_Reproductive	F	11	2	24506519	0.9729
E2_LJA258	7	cervical_lining	Cervical_lining	Female_Reproductive	F	11	2	29400805	0.9748
E2_LJA259	7	Fornix_vagina	Fornix_vagina	Female_Reproductive	F	11	2	32110623	0.9751
E2_LJA260	7	Ureter	Ureter	Other	F	11	2	24587355	0.9774
E2_LJA261	7	bladder	bladder	Other	F	11	2	88774995	0.9743
E2_LJA262	7	Urethra	Urethra	Other	F	11	2	35284295	0.9749
E2_LJA263	7	Mammary_gland	Mammary	Mammary	F	11	2	18272151	0.9752
E2_LJA264	7	Longissimus_dorsi	Muscle	Muscle	F	11	2	48330279	0.9667
E2_LJA265	7	Semitendinosus_eye	Muscle	Muscle	F	11	2	16001311	0.9638
E2_LJA266	7	Biceps_femoris	Muscle	Muscle	F	11	2	35916103	0.9577
E2_LJA267a	7	Infraspinatus	Muscle	Muscle	F	11	2	27993234	0.9698
E2_LJA268	7	Gluteus_medius	Muscle	Muscle	F	11	2	25817701	0.9645
E2_LJA270	7	Semimembranosus	Muscle	Muscle	F	11	2	25214017	0.9716
E2_LJA271	7	Rectus_femoris	Muscle	Muscle	F	11	2	39673994	0.977
E2_LJA272	7	Triceps_brachii	Muscle	Muscle	F	11	2	33438541	0.9746
E2_LJA273	7	Supraspinatus	Muscle	Muscle	F	11	2	32447571	0.9634
E2_LJA274	7	Abomasum	Abomasum	Alimentary_canal	F	11	2	28206507	0.9476
E2_LJA276	7	Ascending_colon	Ascending_colon	Alimentary_canal	F	11	2	51312141	0.9437
E2_LJA277	7	Descending_Colon	Descending_Colon	Alimentary_canal	F	11	2	40972118	0.9303
E2_LJA278	7	Caecum	Caecum	Alimentary_canal	F	11	2	36997735	0.936
E2_LJA279	7	Spleen	Spleen	Blood/Immune	F	11	2	37799241	0.9422
E2_LJA28	7	Midbrain	Midbrain	CNS	F	11	2	33781484	0.9663
E2_LJA280	7	Duodenum	Duodenum	Alimentary_canal	F	11	2	41681277	0.9501
E2_LJA281	7	Ileum	Ileum	Alimentary_canal	F	11	2	19678670	0.96
E2_LJA282	7	Omasum	Omasum	Alimentary_canal	F	11	2	47274190	0.9513
E2_LJA283	7	Jejunum	Jejunum	Alimentary_canal	F	11	2	39367914	0.9692
E2_LJA284	7	RumenPapillae	RumenPapillae	Alimentary_canal	F	11	2	68247510	0.9655
E2_LJA285	7	Rumen	Rumen	Alimentary_canal	F	11	2	40536924	0.9501
E2_LJA286	7	Reticulum	Reticulum	Alimentary_canal	F	11	2	42704165	0.9756
E2_LJA287	7	Bone_marrow	Bone_marrow	Other	F	11	2	47248467	0.9714
E2_LJA288	7	Cancer_eye	Eye	Other	F	11	2	33688850	0.9746
E2_LJA289	7	White_blood_cells	White_blood_cells	Blood/Immune	F	11	2	41801276	0.9679
E2_LJA290	7	lower_tongue	Tongue	Other	F	11	2	50828600	0.9671
E2_LJA291	7	mesenteric_lymph_node	Lymph_nodes	Blood/Immune	F	11	2	36262472	0.9732
E2_LJA292a	7	vesicular_gland	Vesicular_gland	Endocrine	F	11	2	44663554	0.9194
E2_LJA293	7	bulbourethral_gland	Bulbourethral_gland	Endocrine	F	11	2	11644758	0.9748
E2_LJA294	7	tail_epididymis	Tail_epididymis	Male_Reproductive	M	11	2	35465445	0.9639
E2_LJA295	7	follicle_2	Follicle	Female_Reproductive	F	11	2	15618353	0.9591
E2_LJA296	7	follicle_4	Follicle	Female_Reproductive	F	11	2	24443437	0.9692
E2_LJA32	7	Pineal_Gland	Pineal_gland	Endocrine	F	11	2	46873589	0.9283
E2_LJA38	7	Ant._Eye	Eye	Other	F	11	2	23413640	0.9671
E2_LJA48	7	Thyroid	Thyroid	Endocrine	F	11	2	28708488	0.9639
E2_LJA81	7	Hippocampus	Hippocampus	CNS	F	11	2	61199698	0.974
E2_LJA96	7	Diencephalon	Diencephalon	CNS	F	11	2	41758172	0.9775
E4_AG1	8	Adrenal	Adrenal	Endocrine	F	3	3	47307058	0.9577	Study 3 for 18 tissues x 3 individual of Holstein (SRP042639)
E4_AG2	8	Adrenal	Adrenal	Endocrine	F	3	3	55760533	0.9561
E4_AG3	8	Adrenal	Adrenal	Endocrine	F	3	3	14757387	0.9504
E4_BI1	8	Black_Skin	Skin	Other	F	3	3	6139657	0.949
E4_BI2	8	Black_Skin	Skin	Other	F	3	3	22279019	0.9517
E4_BI3	8	Black_Skin	Skin	Other	F	3	3	15318558	0.9524
E4_Brainlobe1	8	Brain_lobe	Brain_lobe	CNS	F	3	3	14848330	0.9623
E4_Brainlobe2	8	Brain_lobe	Brain_lobe	CNS	F	3	3	12854160	0.9621
E4_Brainlobe3	8	Brain_lobe	Brain_lobe	CNS	F	3	3	18137329	0.9589
E4_cerebellum1	8	Cerebellum	Cerebellum	CNS	F	3	3	18444391	0.9642
E4_cerebellum2	8	Cerebellum	Cerebellum	CNS	F	3	3	15309662	0.9582
E4_cerebellum3	8	Cerebellum	Cerebellum	CNS	F	3	3	11619415	0.9578
E4_Heart1	8	Heart	Heart	Cardiovascular	F	3	3	12252806	0.9606
E4_Heart2	8	Heart	Heart	Cardiovascular	F	3	3	10283331	0.9637
E4_Heart3	8	Heart	Heart	Cardiovascular	F	3	3	54399620	0.8681
E4_Liver1	8	Liver	Liver	Liver	F	3	3	38332074	0.9363
E4_Liver2	8	Liver	Liver	Liver	F	3	3	29897525	0.9459
E4_Liver3	8	Liver	Liver	Liver	F	3	3	31510781	0.935
E4_Lung1	8	Lung	Lung	Lung	F	3	3	10579559	0.9469
E4_Lung2	8	Lung	Lung	Lung	F	3	3	31100765	0.9136
E4_Lung3	8	Lung	Lung	Lung	F	3	3	10342147	0.9536
E4_lymph1	8	Lymph_nodes	Lymph_nodes	Blood/Immune	F	3	3	16134342	0.9333
E4_lymph2	8	Lymph_nodes	Lymph_nodes	Blood/Immune	F	3	3	14928051	0.93
E4_lymph3	8	Lymph_nodes	Lymph_nodes	Blood/Immune	F	3	3	14998837	0.9327
E4_Mammary1	8	Mammary_L	Mammary	Mammary	F	3	3	11574030	0.9642
E4_Mammary2	8	Mammary_L	Mammary	Mammary	F	3	3	14893446	0.9602
E4_Mammary3	8	Mammary_L	Mammary	Mammary	F	3	3	13597915	0.9633
E4_Muscle1	8	Muscle	Muscle	Muscle	F	3	3	14804973	0.9619
E4_Muscle2	8	Muscle	Muscle	Muscle	F	3	3	17852468	0.9614
E4_Muscle3	8	Muscle	Muscle	Muscle	F	3	3	33470015	0.9582
E4_Ovary1	8	Ovary	Ovary	Female_Reproductive	F	3	3	10661816	0.9438
E4_Ovary2	8	Ovary	Ovary	Female_Reproductive	F	3	3	16540202	0.9449
E4_Ovary3	8	Ovary	Ovary	Female_Reproductive	F	3	3	15847995	0.9365
E4_RenalM1	8	Renal_medulla	Kidney_Medulla	Kidney	F	3	3	34918953	0.9612
E4_RenalM2	8	Renal_medulla	Kidney_Medulla	Kidney	F	3	3	39316117	0.9507
E4_RenalM3	8	Renal_medulla	Kidney_Medulla	Kidney	F	3	3	40697973	0.9136
E4_Spleen1	8	Spleen	Spleen	Blood/Immune	F	3	3	11258195	0.9147
E4_Spleen2	8	Spleen	Spleen	Blood/Immune	F	3	3	18098878	0.9134
E4_Spleen3	8	Spleen	Spleen	Blood/Immune	F	3	3	10647776	0.9195
E4_Thymus1	8	Thymus	Thymus	Blood/Immune	F	3	3	21879087	0.9492
E4_Thymus2	8	Thymus	Thymus	Blood/Immune	F	3	3	30483043	0.9465
E4_Thymus3	8	Thymus	Thymus	Blood/Immune	F	3	3	17439556	0.9485
E4_Thyroid1	8	Thyroid	Thyroid	Endocrine	F	3	3	17508240	0.9448
E4_Thyroid2	8	Thyroid	Thyroid	Endocrine	F	3	3	49595003	0.9496
E4_Thyroid3	8	Thyroid	Thyroid	Endocrine	F	3	3	24082539	0.9531
E4_Tongue1	8	Tongue	Tongue	Other	F	3	3	20664916	0.9625
E4_Tongue2	8	Tongue	Tongue	Other	F	3	3	14783860	0.96
E4_Tongue3	8	Tongue	Tongue	Other	F	3	3	11307965	0.9589
E4_WBC1	8	White_blood_cells	White_blood_cells	Blood/Immune	F	3	3	14826531	0.942
E4_WBC2	8	White_blood_cells	White_blood_cells	Blood/Immune	F	3	3	13976350	0.9487
E4_WBC3	8	White_blood_cells	White_blood_cells	Blood/Immune	F	3	3	16795456	0.9454
E4_WI1	8	White_skin	Skin	Other	F	3	3	18619247	0.9383
E4_WI2	8	White_skin	Skin	Other	F	3	3	17082857	0.9494
E4_WI3	8	White_skin	Skin	Other	F	3	3	18379807	0.9434
E5_SRR594473	9	brain	Brain	CNS	M	3	4	94084550	0.9251	Study 4 (PRJNA177791) for 9 tissue x 3 individuals of Holstein
E5_SRR594474	9	colon	Colon	Alimentary_canal	M	3	4	105395095	0.8999
E5_SRR594475	9	Heart	Heart	Cardiovascular	M	3	4	96081893	0.9298
E5_SRR594476	9	kidney	Kidney	Kidney	M	3	4	102781791	0.9283
E5_SRR594477	9	Liver	Liver	Liver	M	3	4	94500432	0.9154
E5_SRR594478	9	Lung	Lung	Lung	M	3	4	89657916	0.9206
E5_SRR594479	9	skeletalmuscle	Muscle	Muscle	M	3	4	95488281	0.9088
E5_SRR594480	9	Spleen	Spleen	Blood/Immune	M	3	4	100874869	0.9242
E5_SRR594481	9	testes	Testes	Male_Reproductive	M	3	4	95550929	0.9469	0.903837
E5_SRR594482	10	brain	Brain	CNS	M	3	4	26356423	0.9156
E5_SRR594483	10	colon	Colon	Alimentary_canal	M	3	4	25192897	0.8625
E5_SRR594484	10	Heart	Heart	Cardiovascular	M	3	4	20325059	0.9133
E5_SRR594485	10	kidney	Kidney	Kidney	M	3	4	25618913	0.9021
E5_SRR594486	10	Liver	Liver	Liver	M	3	4	24191466	0.9091
E5_SRR594487	10	Lung	Lung	Lung	M	3	4	20942470	0.8863
E5_SRR594488	10	skeletalmuscle	Muscle	Muscle	M	3	4	25214350	0.8897
E5_SRR594489	10	Spleen	Spleen	Blood/Immune	M	3	4	22161802	0.849
E5_SRR594490	10	testes	Testes	Male_Reproductive	M	3	4	27414056	0.9047
E5_SRR594491	11	brain	Brain	CNS	M	3	4	24647973	0.9186
E5_SRR594492	11	colon	Colon	Alimentary_canal	M	3	4	21821118	0.8719
E5_SRR594493	11	Heart	Heart	Cardiovascular	M	3	4	29167244	0.914
E5_SRR594494	11	kidney	Kidney	Kidney	M	3	4	20989163	0.9008
E5_SRR594495	11	Liver	Liver	Liver	M	3	4	27507235	0.9044
E5_SRR594496	11	Lung	Lung	Lung	M	3	4	30618579	0.8962
E5_SRR594497	11	skeletalmuscle	Muscle	Muscle	M	3	4	22954546	0.9104
E5_SRR594498	11	Spleen	Spleen	Blood/Immune	M	3	4	27630872	0.8441
E5_SRR594499	11	testes	Testes	Male_Reproductive	M	3	4	18661586	0.9119
E6_Ventricle	12	Ventricle	Ventricle	Cardiovascular	F	11	5	60129065	0.9584	Study 5 (PRJNA379574)
E6_Uterine_myometrium	12	Uterine_myometrium	Uterine_myometrium	Female_Reproductive	F	11	5	85819945	0.9527
E6_Thalamus	12	Thalamus	Thalamus	CNS	F	11	5	39241748	0.9447
E6_Temporal_cortex	12	Temporal_cortex	Temporal_cortex	CNS	F	11	5	31960310	0.9422
E6_Subcutaneous_fat	12	Subcutaneous_fat	Adipose	Adipose	F	11	5	32708111	0.9655
E6_Rumen	12	Rumen	Rumen	Alimentary_canal	F	11	5	56059084	0.9362
E6_Reticulum	12	Reticulum	Reticulum	Alimentary_canal	F	11	5	145925411	0.9133
E6_Omasum	12	Omasum	Omasum	Alimentary_canal	F	11	5	31260348	0.9138
E6_Nasal_mucosa	12	Nasal_mucosa	Nasal_mucosa	Other	F	11	5	31881689	0.9262
E6_Medulla_oblongata	12	Medulla_oblongata	Medulla_oblongata	CNS	F	11	5	26476972	0.9384
E6_Mammary	12	Mammary_D	Mammary	Mammary	F	11	5	93475130	0.9615
E6_Lymph_nodes	12	Lymph_nodes	Lymph_nodes	Blood/Immune	F	11	5	27323930	0.9449
E6_Lung	12	Lung	Lung	Lung	F	11	5	36444381	0.9344
E6_Visceral_fat	12	Visceral_fat	Adipose	Adipose	F	11	5	26131715	0.9378
E6_Hypothalamus	12	Hypothalamus	Hypothalamus	CNS	F	11	5	41852292	0.9347
E6_Frontal_cortex	12	Frontal_cortex	Frontal_cortex	CNS	F	11	5	30415708	0.9546
E6_Duodenum	12	Duodenum	Duodenum	Alimentary_canal	F	11	5	37094194	0.9566
E6_Cerebellum	12	Cerebellum	Cerebellum	CNS	F	11	5	69432651	0.9261
E6_Bone_Marrow	12	Bone_marrow	Bone_marrow	Other	F	11	5	29327063	0.954
E6_Atrium	12	Atrium	Atrium	Cardiovascular	F	11	5	50987432	0.9519
E6_Aorta	12	Aorta	Aorta	Cardiovascular	F	11	5	37438863	0.9525
E6_Anterior_Pituitary	12	Anterior_pituitary	Anterior_pituitary	Endocrine	F	11	5	56164966	0.9556
E6_Abomasum	12	Abomasum	Abomasum	Alimentary_canal	F	11	5	34402887	0.9444
E6_Testes	12	testes	Testes	Male_Reproductive	M	11	5	26560903	0.9264
E7_HD1	13	Mammary_D	Mammary	Mammary	F	3	6	61952067	0.9123	study 6 (PRJNA416150)
E7_HD2	14	Mammary_D	Mammary	Mammary	F	3	6	71420786	0.9117
E7_HD3	15	Mammary_D	Mammary	Mammary	F	3	6	72278425	0.913
E7_HP1	16	Mammary_L	Mammary	Mammary	F	3	6	66820805	0.9261
E7_HP2	17	Mammary_L	Mammary	Mammary	F	3	6	81849590	0.9299
E7_HP3	18	Mammary_L	Mammary	Mammary	F	3	6	71728714	0.9261
E7_LD1	19	Mammary_D	Mammary	Mammary	F	3	6	79933351	0.9225
E7_LD2	20	Mammary_D	Mammary	Mammary	F	3	6	60128914	0.9055
E7_LD3	21	Mammary_D	Mammary	Mammary	F	3	6	69013352	0.9047
E7_LP1	22	Mammary_L	Mammary	Mammary	F	3	6	69478072	0.9192
E7_LP2	23	Mammary_L	Mammary	Mammary	F	3	6	70765310	0.9312
E7_LP3	24	Mammary_L	Mammary	Mammary	F	3	6	64601124	0.9314
E8_Lib_Bulk_BT1	25	Rumen_ephthelial_cell	Rumen_ephthelial_cell	Alimentary_canal	F	0	7	13355171	0.9001	study 7 newly generated in the current study
E8_Lib_Bulk_BT2	25	Rumen_ephthelial_cell	Rumen_ephthelial_cell	Alimentary_canal	F	0	7	14480258	0.9018
E8_Lib_Bulk_BT3	25	Rumen_ephthelial_cell	Rumen_ephthelial_cell	Alimentary_canal	F	0	7	13129827	0.9087
E8_Lib_Bulk_C1	25	Rumen_ephthelial_cell	Rumen_ephthelial_cell	Alimentary_canal	F	0	7	14783398	0.9047
E8_Lib_Bulk_C2	25	Rumen_ephthelial_cell	Rumen_ephthelial_cell	Alimentary_canal	F	0	7	13620409	0.9076
E8_Lib_Bulk_C3	25	Rumen_ephthelial_cell	Rumen_ephthelial_cell	Alimentary_canal	F	0	7	14783398	0.9047
E9_SRR3050071	26	White_blood_cells	White_blood_cells	Blood/Immune	F	3	8	11650703	0.9684	Study 8 for PRJNA305942
E9_SRR3080890	27	White_blood_cells	White_blood_cells	Blood/Immune	F	3	8	66703441	0.971
E9_SRR3080891	28	Milk_cells	Milk_cells	Blood/Immune	F	3	8	20130723	0.975
E9_SRR3080892	29	Milk_cells	Milk_cells	Blood/Immune	F	3	8	29077892	0.9763
E9_SRR3081139	30	White_blood_cells	White_blood_cells	Blood/Immune	F	3	8	21218874	0.9666
E9_SRR3081145	31	White_blood_cells	White_blood_cells	Blood/Immune	F	3	8	22293144	0.9687
E9_SRR3081157	32	Milk_cells	Milk_cells	Blood/Immune	F	3	8	19609504	0.9663
E9_SRR3081160	33	Milk_cells	Milk_cells	Blood/Immune	F	3	8	23336249	0.9684
E9_SRR3081171	34	White_blood_cells	White_blood_cells	Blood/Immune	F	3	8	107183693	0.9721
E9_SRR3081175	35	Milk_cells	Milk_cells	Blood/Immune	F	3	8	24149224	0.9715
E9_SRR3081180	36	Milk_cells	Milk_cells	Blood/Immune	F	3	8	3634575	0.9679
E9_SRR4408779	37	Milk_cells	Milk_cells	Blood/Immune	F	3	8	6351923	0.9683
E9_SRR4408780	38	Milk_cells	Milk_cells	Blood/Immune	F	3	8	2761978	0.9667
E9_SRR4408781	39	Milk_cells	Milk_cells	Blood/Immune	F	3	8	3443185	0.9629
E9_SRR4408782	40	Milk_cells	Milk_cells	Blood/Immune	F	3	8	5901775	0.9572
E9_SRR4408783	41	Milk_cells	Milk_cells	Blood/Immune	F	3	8	2564495	0.9594
E9_SRR4408784	42	Milk_cells	Milk_cells	Blood/Immune	F	3	8	547315	0.9422
E9_SRR4408785	43	Milk_cells	Milk_cells	Blood/Immune	F	3	8	7095028	0.9609
E9_SRR4408786	44	Milk_cells	Milk_cells	Blood/Immune	F	3	8	5069216	0.9575
E9_SRR4408787	45	Milk_cells	Milk_cells	Blood/Immune	F	3	8	5970393	0.9526
E9_SRR4408788	46	Milk_cells	Milk_cells	Blood/Immune	F	3	8	5440657	0.9716
E9_SRR4408789	47	Milk_cells	Milk_cells	Blood/Immune	F	3	8	8087573	0.9468
E9_SRR4408790	48	White_blood_cells	White_blood_cells	Blood/Immune	F	3	8	4093831	0.943
E9_SRR4408791	49	White_blood_cells	White_blood_cells	Blood/Immune	F	3	8	8917159	0.9536
E9_SRR4408792	50	Milk_cells	Milk_cells	Blood/Immune	F	3	8	4679693	0.9477
E9_SRR4408793	51	White_blood_cells	White_blood_cells	Blood/Immune	F	3	8	5562892	0.9542
E9_SRR4408794	52	White_blood_cells	White_blood_cells	Blood/Immune	F	3	8	5642749	0.9403
E9_SRR4408795	53	White_blood_cells	White_blood_cells	Blood/Immune	F	3	8	7446203	0.9496
E9_SRR4408796	54	White_blood_cells	White_blood_cells	Blood/Immune	F	3	8	3961184	0.9554
E9_SRR4408797	55	White_blood_cells	White_blood_cells	Blood/Immune	F	3	8	6034455	0.9537
E9_SRR4408798	56	White_blood_cells	White_blood_cells	Blood/Immune	F	3	8	7537543	0.959
E9_SRR4408799	57	White_blood_cells	White_blood_cells	Blood/Immune	F	3	8	5765527	0.9564
E9_SRR4408800	58	White_blood_cells	White_blood_cells	Blood/Immune	F	3	8	6398819	0.9589
E9_SRR4408801	59	White_blood_cells	White_blood_cells	Blood/Immune	F	3	8	3816380	0.9655
E9_SRR4408802	60	White_blood_cells	White_blood_cells	Blood/Immune	F	3	8	1769194	0.9592
E9_SRR4408803	61	Milk_cells	Milk_cells	Blood/Immune	F	3	8	8260184	0.9529
E9_SRR4408804	62	White_blood_cells	White_blood_cells	Blood/Immune	F	3	8	8996604	0.9594
E9_SRR4408805	63	White_blood_cells	White_blood_cells	Blood/Immune	F	3	8	5034726	0.9555
E9_SRR4408806	64	White_blood_cells	White_blood_cells	Blood/Immune	F	3	8	6687955	0.958
E9_SRR4408807	65	White_blood_cells	White_blood_cells	Blood/Immune	F	3	8	6295335	0.9544
E9_SRR4408808	66	White_blood_cells	White_blood_cells	Blood/Immune	F	3	8	7095269	0.9567
E9_SRR4408809	67	White_blood_cells	White_blood_cells	Blood/Immune	F	3	8	6440210	0.9543
E9_SRR4408810	68	White_blood_cells	White_blood_cells	Blood/Immune	F	3	8	3057665	0.9547
E9_SRR4408811	69	White_blood_cells	White_blood_cells	Blood/Immune	F	3	8	5910759	0.9576
E9_SRR4408812	70	White_blood_cells	White_blood_cells	Blood/Immune	F	3	8	8100373	0.9676
E9_SRR4408813	71	White_blood_cells	White_blood_cells	Blood/Immune	F	3	8	7239167	0.9554
E9_SRR4408814	72	Milk_cells	Milk_cells	Blood/Immune	F	3	8	5868519	0.9602
E9_SRR4408815	73	White_blood_cells	White_blood_cells	Blood/Immune	F	3	8	4847316	0.9536
E9_SRR4408816	74	White_blood_cells	White_blood_cells	Blood/Immune	F	3	8	8377452	0.9542
E9_SRR4408817	75	White_blood_cells	White_blood_cells	Blood/Immune	F	3	8	5752994	0.9545
E9_SRR4408818	76	White_blood_cells	White_blood_cells	Blood/Immune	F	3	8	8164657	0.9559
E9_SRR4408819	77	White_blood_cells	White_blood_cells	Blood/Immune	F	3	8	4275868	0.9542
E9_SRR4408820	78	White_blood_cells	White_blood_cells	Blood/Immune	F	3	8	6856742	0.9537
E9_SRR4408821	79	White_blood_cells	White_blood_cells	Blood/Immune	F	3	8	4586344	0.9468
E9_SRR4408822	80	White_blood_cells	White_blood_cells	Blood/Immune	F	3	8	2895389	0.953
E9_SRR4408823	81	White_blood_cells	White_blood_cells	Blood/Immune	F	3	8	13819369	0.9661
E9_SRR4408824	82	White_blood_cells	White_blood_cells	Blood/Immune	F	3	8	8274530	0.9552
E9_SRR4408825	83	Milk_cells	Milk_cells	Blood/Immune	F	3	8	3118407	0.9365
E9_SRR4408826	84	White_blood_cells	White_blood_cells	Blood/Immune	F	3	8	11145331	0.9525
E9_SRR4408827	85	White_blood_cells	White_blood_cells	Blood/Immune	F	3	8	7274542	0.958
E9_SRR4408828	86	White_blood_cells	White_blood_cells	Blood/Immune	F	3	8	7530653	0.9552
E9_SRR4408829	87	White_blood_cells	White_blood_cells	Blood/Immune	F	3	8	6239368	0.9537
E9_SRR4408830	88	White_blood_cells	White_blood_cells	Blood/Immune	F	3	8	9946050	0.9516
E9_SRR4408831	89	White_blood_cells	White_blood_cells	Blood/Immune	F	3	8	7265315	0.9453
E9_SRR4408832	90	White_blood_cells	White_blood_cells	Blood/Immune	F	3	8	10990777	0.9586
E9_SRR4408833	91	White_blood_cells	White_blood_cells	Blood/Immune	F	3	8	26810	0.2469
E9_SRR4408834	92	White_blood_cells	White_blood_cells	Blood/Immune	F	3	8	5142398	0.9646
E9_SRR4408836	93	Milk_cells	Milk_cells	Blood/Immune	F	3	8	5191150	0.9551
E9_SRR4408837	94	White_blood_cells	White_blood_cells	Blood/Immune	F	3	8	6836422	0.9448
E9_SRR4408838	95	White_blood_cells	White_blood_cells	Blood/Immune	F	3	8	4363822	0.9558
E9_SRR4408839	96	White_blood_cells	White_blood_cells	Blood/Immune	F	3	8	8795444	0.9514
E9_SRR4408840	97	White_blood_cells	White_blood_cells	Blood/Immune	F	3	8	7454129	0.9579
E9_SRR4408841	98	White_blood_cells	White_blood_cells	Blood/Immune	F	3	8	4853077	0.9491
E9_SRR4408842	99	White_blood_cells	White_blood_cells	Blood/Immune	F	3	8	5192151	0.9524
E9_SRR4408843	100	White_blood_cells	White_blood_cells	Blood/Immune	F	3	8	4296868	0.9508
E9_SRR4408844	101	White_blood_cells	White_blood_cells	Blood/Immune	F	3	8	2204031	0.9561
E9_SRR4408845	102	White_blood_cells	White_blood_cells	Blood/Immune	F	3	8	6864913	0.955
E9_SRR4408846	103	White_blood_cells	White_blood_cells	Blood/Immune	F	3	8	4832724	0.9637
E9_SRR4408847	104	Milk_cells	Milk_cells	Blood/Immune	F	3	8	6354841	0.9583
E9_SRR4408848	105	White_blood_cells	White_blood_cells	Blood/Immune	F	3	8	11089306	0.9574
E9_SRR4408849	106	White_blood_cells	White_blood_cells	Blood/Immune	F	3	8	5596515	0.9552
E9_SRR4408850	107	White_blood_cells	White_blood_cells	Blood/Immune	F	3	8	7320990	0.956
E9_SRR4408851	108	White_blood_cells	White_blood_cells	Blood/Immune	F	3	8	5864893	0.9505
E9_SRR4408852	109	White_blood_cells	White_blood_cells	Blood/Immune	F	3	8	4472856	0.9412
E9_SRR4408853	110	White_blood_cells	White_blood_cells	Blood/Immune	F	3	8	6560282	0.959
E9_SRR4408854	111	White_blood_cells	White_blood_cells	Blood/Immune	F	3	8	7830359	0.9518
E9_SRR4408855	112	White_blood_cells	White_blood_cells	Blood/Immune	F	3	8	4811304	0.9451
E9_SRR4408856	113	White_blood_cells	White_blood_cells	Blood/Immune	F	3	8	4415984	0.9507
E9_SRR4408857	114	White_blood_cells	White_blood_cells	Blood/Immune	F	3	8	3695328	0.9642
E9_SRR4408858	115	Milk_cells	Milk_cells	Blood/Immune	F	3	8	3680184	0.9514
E9_SRR4408859	116	White_blood_cells	White_blood_cells	Blood/Immune	F	3	8	8901673	0.9575
E9_SRR4408860	117	White_blood_cells	White_blood_cells	Blood/Immune	F	3	8	4913595	0.9559
E9_SRR4408861	118	White_blood_cells	White_blood_cells	Blood/Immune	F	3	8	8957911	0.9615
E9_SRR4408862	119	White_blood_cells	White_blood_cells	Blood/Immune	F	3	8	6473991	0.9528
E9_SRR4408863	120	White_blood_cells	White_blood_cells	Blood/Immune	F	3	8	3659425	0.9524
E9_SRR4408864	121	White_blood_cells	White_blood_cells	Blood/Immune	F	3	8	7391370	0.9569
E9_SRR4408865	122	White_blood_cells	White_blood_cells	Blood/Immune	F	3	8	2110753	0.9527
E9_SRR4408866	123	White_blood_cells	White_blood_cells	Blood/Immune	F	3	8	6948966	0.9556
E9_SRR4408867	124	White_blood_cells	White_blood_cells	Blood/Immune	F	3	8	9727103	0.9523
E9_SRR4408868	125	White_blood_cells	White_blood_cells	Blood/Immune	F	3	8	6008196	0.9585
E9_SRR4408869	126	Milk_cells	Milk_cells	Blood/Immune	F	3	8	6709411	0.9536
E9_SRR4408870	127	White_blood_cells	White_blood_cells	Blood/Immune	F	3	8	5527824	0.9608
E9_SRR4408871	128	White_blood_cells	White_blood_cells	Blood/Immune	F	3	8	3973269	0.9506
E9_SRR4408872	129	White_blood_cells	White_blood_cells	Blood/Immune	F	3	8	6051315	0.954
E9_SRR4408873	130	White_blood_cells	White_blood_cells	Blood/Immune	F	3	8	6634570	0.9514
E9_SRR4408874	131	White_blood_cells	White_blood_cells	Blood/Immune	F	3	8	5515469	0.9569
E9_SRR4408875	132	White_blood_cells	White_blood_cells	Blood/Immune	F	3	8	9118965	0.9573
E9_SRR4408876	133	White_blood_cells	White_blood_cells	Blood/Immune	F	3	8	6869243	0.9573
E9_SRR4408877	134	White_blood_cells	White_blood_cells	Blood/Immune	F	3	8	4305647	0.9525
E9_SRR4408878	135	White_blood_cells	White_blood_cells	Blood/Immune	F	3	8	6694345	0.9539
E9_SRR4408879	136	White_blood_cells	White_blood_cells	Blood/Immune	F	3	8	10147739	0.9677
E9_SRR4408880	137	Milk_cells	Milk_cells	Blood/Immune	F	3	8	4846484	0.9453
E9_SRR4408881	138	White_blood_cells	White_blood_cells	Blood/Immune	F	3	8	8493160	0.9548
E9_SRR4408882	139	White_blood_cells	White_blood_cells	Blood/Immune	F	3	8	5434104	0.9531
E9_SRR4408883	140	White_blood_cells	White_blood_cells	Blood/Immune	F	3	8	4583580	0.9436
E9_SRR4408884	141	White_blood_cells	White_blood_cells	Blood/Immune	F	3	8	8626955	0.9539
E9_SRR4408885	142	White_blood_cells	White_blood_cells	Blood/Immune	F	3	8	3928088	0.9654
E9_SRR4408886	143	White_blood_cells	White_blood_cells	Blood/Immune	F	3	8	348872	0.954
E9_SRR4408887	144	White_blood_cells	White_blood_cells	Blood/Immune	F	3	8	3350567	0.9569
E9_SRR4408888	145	White_blood_cells	White_blood_cells	Blood/Immune	F	3	8	3184915	0.9506
E9_SRR4408889	146	White_blood_cells	White_blood_cells	Blood/Immune	F	3	8	3219972	0.9584
E9_SRR4408890	147	White_blood_cells	White_blood_cells	Blood/Immune	F	3	8	6265225	0.9659
E9_SRR4408891	148	Milk_cells	Milk_cells	Blood/Immune	F	3	8	3822131	0.9641
E9_SRR4408892	149	Milk_cells	Milk_cells	Blood/Immune	F	3	8	2456545	0.946
E9_SRR4408893	150	White_blood_cells	White_blood_cells	Blood/Immune	F	3	8	2764197	0.9543
E9_SRR4408894	151	White_blood_cells	White_blood_cells	Blood/Immune	F	3	8	4014915	0.9568
E9_SRR4408895	152	White_blood_cells	White_blood_cells	Blood/Immune	F	3	8	1632541	0.9555
E9_SRR4408896	153	White_blood_cells	White_blood_cells	Blood/Immune	F	3	8	3450897	0.9546
E9_SRR4408897	154	White_blood_cells	White_blood_cells	Blood/Immune	F	3	8	1305745	0.9584
E9_SRR4408898	155	White_blood_cells	White_blood_cells	Blood/Immune	F	3	8	2659454	0.948
E9_SRR4408899	156	White_blood_cells	White_blood_cells	Blood/Immune	F	3	8	3566471	0.9532
E9_SRR4408900	157	White_blood_cells	White_blood_cells	Blood/Immune	F	3	8	3531687	0.9548
E9_SRR4408901	158	White_blood_cells	White_blood_cells	Blood/Immune	F	3	8	2970199	0.9515
E9_SRR4408902	159	White_blood_cells	White_blood_cells	Blood/Immune	F	3	8	4567395	0.9731
E9_SRR4408903	160	Milk_cells	Milk_cells	Blood/Immune	F	3	8	1602849	0.9486
E9_SRR4408904	161	White_blood_cells	White_blood_cells	Blood/Immune	F	3	8	3875167	0.9567
E9_SRR4408905	162	White_blood_cells	White_blood_cells	Blood/Immune	F	3	8	3217263	0.9429
E9_SRR4408906	163	White_blood_cells	White_blood_cells	Blood/Immune	F	3	8	2606937	0.9526
E9_SRR4408907	164	White_blood_cells	White_blood_cells	Blood/Immune	F	3	8	2653227	0.9508
E9_SRR4408908	165	White_blood_cells	White_blood_cells	Blood/Immune	F	3	8	3258342	0.9524
E9_SRR4408909	166	White_blood_cells	White_blood_cells	Blood/Immune	F	3	8	2601337	0.9521
E9_SRR4408910	167	White_blood_cells	White_blood_cells	Blood/Immune	F	3	8	920765	0.9609
E9_SRR4408911	168	Milk_cells	Milk_cells	Blood/Immune	F	3	8	292962	0.9561
E9_SRR4408912	169	Milk_cells	Milk_cells	Blood/Immune	F	3	8	489847	0.9567
E9_SRR4408913	170	Milk_cells	Milk_cells	Blood/Immune	F	3	8	4138738	0.9592
E9_SRR4408914	171	Milk_cells	Milk_cells	Blood/Immune	F	3	8	1422586	0.9652
E9_SRR4408915	172	Milk_cells	Milk_cells	Blood/Immune	F	3	8	722707	0.9629
E9_SRR4408916	173	Milk_cells	Milk_cells	Blood/Immune	F	3	8	1175347	0.9576
E9_SRR4408917	174	Milk_cells	Milk_cells	Blood/Immune	F	3	8	267402	0.9503
E9_SRR4408918	175	Milk_cells	Milk_cells	Blood/Immune	F	3	8	182567	0.9695
E9_SRR4408920	176	Milk_cells	Milk_cells	Blood/Immune	F	3	8	940044	0.9508
E9_SRR4408921	177	Milk_cells	Milk_cells	Blood/Immune	F	3	8	1008134	0.9542
E9_SRR4408922	178	Milk_cells	Milk_cells	Blood/Immune	F	3	8	1292116	0.9536
E9_SRR4408923	179	Milk_cells	Milk_cells	Blood/Immune	F	3	8	321712	0.9395
E9_SRR4408924	180	Milk_cells	Milk_cells	Blood/Immune	F	3	8	431901	0.931
E9_SRR4408925	181	Milk_cells	Milk_cells	Blood/Immune	F	3	8	5614328	0.967
E9_SRR4408926	182	Milk_cells	Milk_cells	Blood/Immune	F	3	8	3284188	0.9586
E9_SRR4408927	183	Milk_cells	Milk_cells	Blood/Immune	F	3	8	2239987	0.9576
E9_SRR4408928	184	Milk_cells	Milk_cells	Blood/Immune	F	3	8	1428192	0.9593
E9_SRR4408929	185	Milk_cells	Milk_cells	Blood/Immune	F	3	8	1542527	0.9578
E9_SRR4408930	186	Milk_cells	Milk_cells	Blood/Immune	F	3	8	1372264	0.9578
E9_SRR4408931	187	Milk_cells	Milk_cells	Blood/Immune	F	3	8	3117833	0.9705
E9_SRR4408932	188	Milk_cells	Milk_cells	Blood/Immune	F	3	8	2768875	0.9593
E9_SRR4408933	189	Milk_cells	Milk_cells	Blood/Immune	F	3	8	3408367	0.9631
E9_SRR4408934	190	Milk_cells	Milk_cells	Blood/Immune	F	3	8	2106873	0.9676
E9_SRR4408935	191	Milk_cells	Milk_cells	Blood/Immune	F	3	8	1947231	0.962
E9_SRR4408936	192	Milk_cells	Milk_cells	Blood/Immune	F	3	8	10174823	0.9779
E9_SRR4408937	193	Milk_cells	Milk_cells	Blood/Immune	F	3	8	1802215	0.9431
E9_SRR4408938	194	Milk_cells	Milk_cells	Blood/Immune	F	3	8	2331056	0.9665
E9_SRR4408939	195	Milk_cells	Milk_cells	Blood/Immune	F	3	8	1536186	0.9485
E9_SRR4408940	196	Milk_cells	Milk_cells	Blood/Immune	F	3	8	2447585	0.9667
E9_SRR4408941	197	Milk_cells	Milk_cells	Blood/Immune	F	3	8	2528576	0.9601
E9_SRR4408942	198	Milk_cells	Milk_cells	Blood/Immune	F	3	8	2472039	0.9465
E9_SRR4408943	199	Milk_cells	Milk_cells	Blood/Immune	F	3	8	2360628	0.9579
E9_SRR4408944	200	White_blood_cells	White_blood_cells	Blood/Immune	F	3	8	117908	0.962
E9_SRR4408945	201	Milk_cells	Milk_cells	Blood/Immune	F	3	8	216223	0.9651
E9_SRR4408946	202	White_blood_cells	White_blood_cells	Blood/Immune	F	3	8	199346	0.9608
E9_SRR4408947	203	Milk_cells	Milk_cells	Blood/Immune	F	3	8	8295615	0.9709
E9_SRR4408948	204	Milk_cells	Milk_cells	Blood/Immune	F	3	8	179784	0.9635
E9_SRR4408949	205	White_blood_cells	White_blood_cells	Blood/Immune	F	3	8	1107225	0.9678
E9_SRR4408950	206	Milk_cells	Milk_cells	Blood/Immune	F	3	8	155960	0.94
E9_SRR4408951	207	White_blood_cells	White_blood_cells	Blood/Immune	F	3	8	8896860	0.9569
E9_SRR4408952	208	Milk_cells	Milk_cells	Blood/Immune	F	3	8	4028860	0.9635
E9_SRR4408953	209	Milk_cells	Milk_cells	Blood/Immune	F	3	8	10377023	0.9601
E9_SRR4408954	210	Milk_cells	Milk_cells	Blood/Immune	F	3	8	8992460	0.9666
E9_SRR4408955	211	Milk_cells	Milk_cells	Blood/Immune	F	3	8	16021556	0.9678
E9_SRR4408956	212	Milk_cells	Milk_cells	Blood/Immune	F	3	8	8779486	0.967
E9_SRR4408957	213	Milk_cells	Milk_cells	Blood/Immune	F	3	8	11215085	0.9704
E9_SRR4408958	214	Milk_cells	Milk_cells	Blood/Immune	F	3	8	13436540	0.9525
E9_SRR4408959	215	Milk_cells	Milk_cells	Blood/Immune	F	3	8	7627291	0.9716
E9_SRR4408960	216	Milk_cells	Milk_cells	Blood/Immune	F	3	8	8002728	0.9694
E9_SRR4408961	217	Milk_cells	Milk_cells	Blood/Immune	F	3	8	2150650	0.9555
E9_SRR4408962	218	Milk_cells	Milk_cells	Blood/Immune	F	3	8	5064149	0.9732
E9_SRR4408963	219	Milk_cells	Milk_cells	Blood/Immune	F	3	8	6432977	0.9553
E9_SRR4408964	220	Milk_cells	Milk_cells	Blood/Immune	F	3	8	4131753	0.9695
E9_SRR4408965	221	Milk_cells	Milk_cells	Blood/Immune	F	3	8	12782602	0.9701
E9_SRR4408966	222	Milk_cells	Milk_cells	Blood/Immune	F	3	8	4036883	0.9604
E9_SRR4408967	223	Milk_cells	Milk_cells	Blood/Immune	F	3	8	5907125	0.9656
E9_SRR4408968	224	Milk_cells	Milk_cells	Blood/Immune	F	3	8	3236279	0.9567
E9_SRR4408969	225	Milk_cells	Milk_cells	Blood/Immune	F	3	8	4927589	0.9737
E9_SRR4408970	226	Milk_cells	Milk_cells	Blood/Immune	F	3	8	6467880	0.9711
E9_SRR4408971	227	Milk_cells	Milk_cells	Blood/Immune	F	3	8	7360496	0.9708
E9_SRR4408972	228	Milk_cells	Milk_cells	Blood/Immune	F	3	8	4003772	0.9669
E9_SRR4408973	229	Milk_cells	Milk_cells	Blood/Immune	F	3	8	794499	0.9462
E9_SRR4408974	230	Milk_cells	Milk_cells	Blood/Immune	F	3	8	6762962	0.9642
E9_SRR4408975	231	Milk_cells	Milk_cells	Blood/Immune	F	3	8	7817568	0.9681
E9_SRR4408976	232	Milk_cells	Milk_cells	Blood/Immune	F	3	8	8461231	0.9587
E9_SRR4408977	233	Milk_cells	Milk_cells	Blood/Immune	F	3	8	7511037	0.9606
E9_SRR4408978	234	Milk_cells	Milk_cells	Blood/Immune	F	3	8	8511550	0.959
E9_SRR4408979	235	Milk_cells	Milk_cells	Blood/Immune	F	3	8	4131703	0.9616
E9_SRR4408981	236	Milk_cells	Milk_cells	Blood/Immune	F	3	8	23109	0.0638
E9_SRR4408982	237	Milk_cells	Milk_cells	Blood/Immune	F	3	8	5223420	0.9542
E9_SRR4408983	238	Milk_cells	Milk_cells	Blood/Immune	F	3	8	8400286	0.9676
E9_SRR4408984	239	Milk_cells	Milk_cells	Blood/Immune	F	3	8	3459419	0.9716
E9_SRR4408985	240	Milk_cells	Milk_cells	Blood/Immune	F	3	8	5750002	0.9647
E9_SRR4408986	241	Milk_cells	Milk_cells	Blood/Immune	F	3	8	4370270	0.9589
E9_SRR4408987	242	Milk_cells	Milk_cells	Blood/Immune	F	3	8	9341419	0.9599
E9_SRR4408988	243	Milk_cells	Milk_cells	Blood/Immune	F	3	8	3602143	0.9663
E9_SRR4408989	244	Milk_cells	Milk_cells	Blood/Immune	F	3	8	1087162	0.9627
E9_SRR4408990	245	Milk_cells	Milk_cells	Blood/Immune	F	3	8	3049879	0.9638
E9_SRR4408991	246	Milk_cells	Milk_cells	Blood/Immune	F	3	8	10771372	0.9649
E9_SRR4408992	247	Milk_cells	Milk_cells	Blood/Immune	F	3	8	6184200	0.9708
E9_SRR4408993	248	Milk_cells	Milk_cells	Blood/Immune	F	3	8	3147450	0.9532
E9_SRR4408994	249	Milk_cells	Milk_cells	Blood/Immune	F	3	8	3315803	0.9593
E9_SRR4408995	250	Milk_cells	Milk_cells	Blood/Immune	F	3	8	2297940	0.9581
E9_SRR4408996	251	Milk_cells	Milk_cells	Blood/Immune	F	3	8	2607887	0.9593
E9_SRR4408997	252	Milk_cells	Milk_cells	Blood/Immune	F	3	8	3781607	0.9662
E9_SRR4408998	253	Milk_cells	Milk_cells	Blood/Immune	F	3	8	6884663	0.9669
E9_SRR4408999	254	Milk_cells	Milk_cells	Blood/Immune	F	3	8	7871608	0.9667
E9_SRR4409000	255	Milk_cells	Milk_cells	Blood/Immune	F	3	8	4818069	0.9649
E9_SRR4409001	256	Milk_cells	Milk_cells	Blood/Immune	F	3	8	4201531	0.9633
E9_SRR4409002	257	Milk_cells	Milk_cells	Blood/Immune	F	3	8	6847934	0.964
E9_SRR4409003	258	Milk_cells	Milk_cells	Blood/Immune	F	3	8	6260180	0.9594
E9_SRR4409004	259	Milk_cells	Milk_cells	Blood/Immune	F	3	8	3576956	0.9731
E9_SRR4409005	260	Milk_cells	Milk_cells	Blood/Immune	F	3	8	4683809	0.9542
E9_SRR4409006	261	Milk_cells	Milk_cells	Blood/Immune	F	3	8	5691704	0.9515
E9_SRR4409007	262	Milk_cells	Milk_cells	Blood/Immune	F	3	8	9784433	0.9645
E9_SRR4409008	263	Milk_cells	Milk_cells	Blood/Immune	F	3	8	720223	0.958
E9_SRR4409009	264	Milk_cells	Milk_cells	Blood/Immune	F	3	8	4924788	0.9638
E9_SRR4409010	265	Milk_cells	Milk_cells	Blood/Immune	F	3	8	7620495	0.9707
E9_SRR4409011	266	Milk_cells	Milk_cells	Blood/Immune	F	3	8	9075238	0.963
E9_SRR4409012	267	Milk_cells	Milk_cells	Blood/Immune	F	3	8	5685291	0.969
E9_SRR4409013	268	Milk_cells	Milk_cells	Blood/Immune	F	3	8	1624369	0.9562
E9_SRR4409014	269	Milk_cells	Milk_cells	Blood/Immune	F	3	8	6898706	0.9672
E9_SRR4409015	270	Milk_cells	Milk_cells	Blood/Immune	F	3	8	7563569	0.9662
E9_SRR4409016	271	Milk_cells	Milk_cells	Blood/Immune	F	3	8	6466143	0.9584
E9_SRR4409017	272	Milk_cells	Milk_cells	Blood/Immune	F	3	8	7557619	0.9615
E9_SRR4409018	273	Milk_cells	Milk_cells	Blood/Immune	F	3	8	3609542	0.9589
E9_SRR4409019	274	Milk_cells	Milk_cells	Blood/Immune	F	3	8	8188435	0.9708
E9_SRR4409020	275	Milk_cells	Milk_cells	Blood/Immune	F	3	8	2140357	0.9565
E9_SRR4409021	276	Milk_cells	Milk_cells	Blood/Immune	F	3	8	2572600	0.9634
E9_SRR4409022	277	Milk_cells	Milk_cells	Blood/Immune	F	3	8	5653510	0.9605
E9_SRR4409023	278	Milk_cells	Milk_cells	Blood/Immune	F	3	8	3208097	0.9695
E9_SRR4409024	279	Milk_cells	Milk_cells	Blood/Immune	F	3	8	8008584	0.9488
E9_SRR4409025	280	Milk_cells	Milk_cells	Blood/Immune	F	3	8	8702823	0.9691
E9_SRR4409026	281	Milk_cells	Milk_cells	Blood/Immune	F	3	8	5794092	0.9623
E9_SRR4409027	282	Milk_cells	Milk_cells	Blood/Immune	F	3	8	3094334	0.9611
E10_SRR5802934	283	White_blood_cells	White_blood_cells	Blood/Immune	F	3	9	18798276	0.9611	Study 9 for SRP111067; PRJNA392196
E10_SRR5802935	284	Liver	Liver	Liver	F	3	9	14915895	0.9748
E10_SRR5802936	285	White_blood_cells	White_blood_cells	Blood/Immune	F	3	9	18532451	0.9683
E10_SRR5802937	286	Liver	Liver	Liver	F	3	9	16239522	0.96
E10_SRR5802938	287	White_blood_cells	White_blood_cells	Blood/Immune	F	3	9	14803695	0.9644
E10_SRR5802939	288	Liver	Liver	Liver	F	3	9	13508248	0.9772
E10_SRR5802940	289	White_blood_cells	White_blood_cells	Blood/Immune	F	3	9	16536618	0.9689
E10_SRR5802941	290	Liver	Liver	Liver	F	3	9	19175787	0.975
E10_SRR5802942	291	White_blood_cells	White_blood_cells	Blood/Immune	F	3	9	16724497	0.9566
E10_SRR5802943	292	Liver	Liver	Liver	F	3	9	14894245	0.9737
E10_SRR5802944	293	Liver	Liver	Liver	F	3	9	22308679	0.9763
E10_SRR5802945	294	White_blood_cells	White_blood_cells	Blood/Immune	F	3	9	16546773	0.9658
E10_SRR5802946	295	Liver	Liver	Liver	F	3	9	14193427	0.9708
E10_SRR5802947	296	White_blood_cells	White_blood_cells	Blood/Immune	F	3	9	20373872	0.9581
E10_SRR5802948	297	Liver	Liver	Liver	F	3	9	13274953	0.9772
E10_SRR5802949	298	White_blood_cells	White_blood_cells	Blood/Immune	F	3	9	14904125	0.9692
E10_SRR5802950	299	Liver	Liver	Liver	F	3	9	15422099	0.9744
E10_SRR5802951	300	White_blood_cells	White_blood_cells	Blood/Immune	F	3	9	24826008	0.9624
E10_SRR5802952	301	Liver	Liver	Liver	F	3	9	24517576	0.9699
E10_SRR5802953	302	White_blood_cells	White_blood_cells	Blood/Immune	F	3	9	17601928	0.9672
E10_SRR5802954	303	White_blood_cells	White_blood_cells	Blood/Immune	F	3	9	16311437	0.9662
E10_SRR5802955	304	Liver	Liver	Liver	F	3	9	11860704	0.977
E10_SRR5802956	305	White_blood_cells	White_blood_cells	Blood/Immune	F	3	9	20685329	0.9595
E10_SRR5802957	306	Liver	Liver	Liver	F	3	9	13593726	0.9762
E10_SRR5802958	307	White_blood_cells	White_blood_cells	Blood/Immune	F	3	9	17715994	0.9604
E10_SRR5802959	308	Liver	Liver	Liver	F	3	9	13828267	0.9735
E10_SRR5802960	309	White_blood_cells	White_blood_cells	Blood/Immune	F	3	9	16879673	0.9648
E10_SRR5802961	310	Liver	Liver	Liver	F	3	9	13483152	0.9725
E10_SRR5802962	311	White_blood_cells	White_blood_cells	Blood/Immune	F	3	9	14119390	0.9663
E10_SRR5802963	312	Liver	Liver	Liver	F	3	9	14939752	0.9753
E10_SRR5802964	313	White_blood_cells	White_blood_cells	Blood/Immune	F	3	9	15190378	0.9583
E10_SRR5802965	314	Liver	Liver	Liver	F	3	9	19501720	0.9726
E10_SRR5802966	315	White_blood_cells	White_blood_cells	Blood/Immune	F	3	9	20288754	0.9602
E10_SRR5802967	316	Liver	Liver	Liver	F	3	9	10698759	0.9771
E10_SRR5802968	317	White_blood_cells	White_blood_cells	Blood/Immune	F	3	9	11771198	0.9607
E10_SRR5802969	318	Liver	Liver	Liver	F	3	9	14506142	0.9728
E10_SRR5802970	319	White_blood_cells	White_blood_cells	Blood/Immune	F	3	9	16683795	0.9675
E10_SRR5802971	320	Liver	Liver	Liver	F	3	9	12596013	0.9749
E10_SRR5802972	321	White_blood_cells	White_blood_cells	Blood/Immune	F	3	9	13392829	0.956
E10_SRR5802973	322	Liver	Liver	Liver	F	3	9	12099549	0.9758
E10_SRR5809434	323	Mammary_L	Mammary	Mammary	F	3	9	42502968	0.9537
E10_SRR5809435	324	Milk_cells	Milk_cells	Blood/Immune	F	3	9	40506470	0.949
E10_SRR5809436	325	Mammary_L	Mammary	Mammary	F	3	9	33859747	0.949
E10_SRR5809437	326	Mammary_L	Mammary	Mammary	F	3	9	163821859	0.9483
E10_SRR5809438	327	Mammary_L	Mammary	Mammary	F	3	9	41263840	0.9578
E10_SRR5809439	328	White_blood_cells	White_blood_cells	Blood/Immune	F	3	9	31738369	0.9543
E10_SRR5809440	329	Milk_cells	Milk_cells	Blood/Immune	F	3	9	7147044	0.944
E10_SRR5809441	330	Milk_cells	Milk_cells	Blood/Immune	F	3	9	47716806	0.9579
E10_SRR5809442	331	White_blood_cells	White_blood_cells	Blood/Immune	F	3	9	15553790	0.9417
E10_SRR5809443	332	White_blood_cells	White_blood_cells	Blood/Immune	F	3	9	40132979	0.9525
E10_SRR5809444	333	White_blood_cells	White_blood_cells	Blood/Immune	F	3	9	13768070	0.9507
E10_SRR5809445	334	White_blood_cells	White_blood_cells	Blood/Immune	F	3	9	39014884	0.9499
E10_SRR5809446	335	Mammary_L	Mammary	Mammary	F	3	9	62299391	0.9542
E10_SRR5809447	336	Milk_cells	Milk_cells	Blood/Immune	F	3	9	29405231	0.9523
E10_SRR5809448	337	Mammary_L	Mammary	Mammary	F	3	9	37270896	0.9551
E10_SRR5809449	338	Milk_cells	Milk_cells	Blood/Immune	F	3	9	37232856	0.9591
E10_SRR5809450	339	Milk_cells	Milk_cells	Blood/Immune	F	3	9	28602475	0.9603
E10_SRR5809451	340	White_blood_cells	White_blood_cells	Blood/Immune	F	3	9	39219936	0.9514
E11_SRR6448594	341	Mammary_L	Mammary	Mammary	F	3	10	34201279	0.9536	Study 10 for PRJNA428884
E11_SRR6448595	342	Mammary_D	Mammary	Mammary	F	3	10	33474343	0.9367
E11_SRR6448596	343	Mammary_D	Mammary	Mammary	F	3	10	33001519	0.9315
E11_SRR6448597	344	Mammary_D	Mammary	Mammary	F	3	10	33239197	0.9417
E11_SRR6448598	345	Mammary_D	Mammary	Mammary	F	3	10	33396790	0.9342
E11_SRR6448599	346	Mammary_L	Mammary	Mammary	F	3	10	33242078	0.9338
E11_SRR6448600	347	Mammary_D	Mammary	Mammary	F	3	10	34318601	0.935
E11_SRR6448601	348	Mammary_D	Mammary	Mammary	F	3	10	33877766	0.9306
E11_SRR6448602	349	Mammary_D	Mammary	Mammary	F	3	10	33121785	0.9288
E11_SRR6448603	350	Mammary_D	Mammary	Mammary	F	3	10	33252513	0.9248
E11_SRR6448604	351	Mammary_L	Mammary	Mammary	F	3	10	33504675	0.9297
E11_SRR6448605	352	Mammary_D	Mammary	Mammary	F	3	10	33303639	0.9354
E11_SRR6448606	353	Mammary_D	Mammary	Mammary	F	3	10	34286621	0.9338
E11_SRR6448607	354	Mammary_D	Mammary	Mammary	F	3	10	34300940	0.9315
E11_SRR6448608	355	Mammary_D	Mammary	Mammary	F	3	10	33974960	0.9263
E11_SRR6448609	356	Mammary_L	Mammary	Mammary	F	3	10	34453199	0.9413
E11_SRR6448610	357	Mammary_D	Mammary	Mammary	F	3	10	34005981	0.9355
E11_SRR6448611	358	Mammary_D	Mammary	Mammary	F	3	10	32846395	0.9438
E11_SRR6448612	359	Mammary_D	Mammary	Mammary	F	3	10	33498600	0.9288
E11_SRR6448613	360	Mammary_D	Mammary	Mammary	F	3	10	33165534	0.9309
E11_SRR6448614	361	Mammary_L	Mammary	Mammary	F	3	10	33994457	0.9593
E11_SRR6448615	362	Mammary_D	Mammary	Mammary	F	3	10	33759004	0.9404
E11_SRR6448616	363	Mammary_D	Mammary	Mammary	F	3	10	39640422	0.9226
E11_SRR6448617	364	Mammary_D	Mammary	Mammary	F	3	10	34198658	0.9316
E11_SRR6448618	365	Mammary_D	Mammary	Mammary	F	3	10	35483174	0.9085
E11_SRR6448619	366	Mammary_L	Mammary	Mammary	F	3	10	33915268	0.9607
E11_SRR6448620	367	Mammary_D	Mammary	Mammary	F	3	10	35832731	0.9368
E11_SRR6448621	368	Mammary_D	Mammary	Mammary	F	3	10	33424852	0.9345
E11_SRR6448622	369	Mammary_D	Mammary	Mammary	F	3	10	34917477	0.9383
E11_SRR6448623	370	Mammary_D	Mammary	Mammary	F	3	10	32339869	0.934
E11_SRR6448624	371	Mammary_L	Mammary	Mammary	F	3	10	34587219	0.9357
E11_SRR6448625	372	Mammary_D	Mammary	Mammary	F	3	10	32834645	0.9347
E11_SRR6448626	373	Mammary_D	Mammary	Mammary	F	3	10	34514692	0.9359
E11_SRR6448627	374	Mammary_D	Mammary	Mammary	F	3	10	33988827	0.9348
E11_SRR6448628	375	Mammary_D	Mammary	Mammary	F	3	10	34664568	0.9319
E11_SRR6448629	376	Mammary_L	Mammary	Mammary	F	3	10	33704870	0.9615
E11_SRR6448630	377	Mammary_D	Mammary	Mammary	F	3	10	33903671	0.94
E11_SRR6448631	378	Mammary_D	Mammary	Mammary	F	3	10	33795822	0.934
E11_SRR6448632	379	Mammary_D	Mammary	Mammary	F	3	10	34014978	0.9389
E11_SRR6448633	380	Mammary_D	Mammary	Mammary	F	3	10	32269556	0.9314
E11_SRR6448634	381	Mammary_L	Mammary	Mammary	F	3	10	33300150	0.9274
E11_SRR6448635	382	Mammary_D	Mammary	Mammary	F	3	10	33549163	0.9252
E11_SRR6448636	383	Mammary_D	Mammary	Mammary	F	3	10	34233879	0.9338
E11_SRR6448637	384	Mammary_D	Mammary	Mammary	F	3	10	34785217	0.9407
E11_SRR6448638	385	Mammary_D	Mammary	Mammary	F	3	10	34887687	0.9394
E11_SRR6448639	386	Mammary_L	Mammary	Mammary	F	3	10	34866388	0.9408
E11_SRR6448640	387	Mammary_D	Mammary	Mammary	F	3	10	34079833	0.9316
E11_SRR6448641	388	Mammary_D	Mammary	Mammary	F	3	10	33802836	0.9362
E11_SRR6448642	389	Mammary_D	Mammary	Mammary	F	3	10	33549908	0.9328
E11_SRR6448643	390	Mammary_D	Mammary	Mammary	F	3	10	35248800	0.9327
E11_SRR6448644	391	Mammary_L	Mammary	Mammary	F	3	10	33736245	0.9289
E11_SRR6448645	392	Mammary_D	Mammary	Mammary	F	3	10	33359541	0.9245
E11_SRR6448646	393	Mammary_D	Mammary	Mammary	F	3	10	33048035	0.9268
E11_SRR6448647	394	Mammary_D	Mammary	Mammary	F	3	10	32887805	0.9329
E11_SRR6448648	395	Mammary_D	Mammary	Mammary	F	3	10	34485241	0.9334
E11_SRR6448649	396	Mammary_L	Mammary	Mammary	F	3	10	33098207	0.9623
E11_SRR6448650	397	Mammary_D	Mammary	Mammary	F	3	10	32908965	0.9364
E11_SRR6448651	398	Mammary_D	Mammary	Mammary	F	3	10	33552478	0.9329
E11_SRR6448652	399	Mammary_D	Mammary	Mammary	F	3	10	33593027	0.9319
E11_SRR6448653	400	Mammary_D	Mammary	Mammary	F	3	10	33316512	0.9346
E12_SRR2659940	401	Endometrium	Endometrium	Female_Reproductive	F	3	11	39502382	0.9161	Study 11 for PRJNA298914
E12_SRR2659941	402	Endometrium	Endometrium	Female_Reproductive	F	3	11	29045354	0.9225
E12_SRR2659942	403	Endometrium	Endometrium	Female_Reproductive	F	3	11	33462583	0.9097
E12_SRR2659943	404	Endometrium	Endometrium	Female_Reproductive	F	3	11	47166151	0.9461
E12_SRR2659944	405	Endometrium	Endometrium	Female_Reproductive	F	3	11	34320119	0.9475
E12_SRR2659945	406	Endometrium	Endometrium	Female_Reproductive	F	3	11	36585855	0.9433
E12_SRR2659946	407	Endometrium	Endometrium	Female_Reproductive	F	3	11	38925824	0.9405
E12_SRR2659947	408	Endometrium	Endometrium	Female_Reproductive	F	3	11	40628189	0.9441
E12_SRR2659948	409	Endometrium	Endometrium	Female_Reproductive	F	3	11	39853353	0.948
E12_SRR2659949	410	Endometrium	Endometrium	Female_Reproductive	F	3	11	43809552	0.944
E12_SRR2659950	411	Endometrium	Endometrium	Female_Reproductive	F	3	11	37178335	0.942
E12_SRR2659951	412	Endometrium	Endometrium	Female_Reproductive	F	3	11	44317846	0.9304
E12_SRR2659952	413	Endometrium	Endometrium	Female_Reproductive	F	3	11	48607899	0.9471
E12_SRR2659953	414	Corpus_Luteum	Corpus_Luteum	Female_Reproductive	F	3	11	48843905	0.9575
E12_SRR2659954	415	Corpus_Luteum	Corpus_Luteum	Female_Reproductive	F	3	11	51452156	0.9574
E12_SRR2659955	416	Corpus_Luteum	Corpus_Luteum	Female_Reproductive	F	3	11	36322443	0.9464
E12_SRR2659956	417	Corpus_Luteum	Corpus_Luteum	Female_Reproductive	F	3	11	50849854	0.9578
E12_SRR2659957	418	Corpus_Luteum	Corpus_Luteum	Female_Reproductive	F	3	11	36600036	0.9558
E12_SRR2659958	419	Corpus_Luteum	Corpus_Luteum	Female_Reproductive	F	3	11	44489184	0.9533
E12_SRR2659959	420	Corpus_Luteum	Corpus_Luteum	Female_Reproductive	F	3	11	36006162	0.9563
E12_SRR2659960	421	Corpus_Luteum	Corpus_Luteum	Female_Reproductive	F	3	11	34292011	0.9518
E12_SRR2659961	422	Corpus_Luteum	Corpus_Luteum	Female_Reproductive	F	3	11	33632580	0.9577
E12_SRR2659962	423	Corpus_Luteum	Corpus_Luteum	Female_Reproductive	F	3	11	47006915	0.956
E12_SRR2659963	424	Corpus_Luteum	Corpus_Luteum	Female_Reproductive	F	3	11	33412176	0.9534
E12_SRR2659964	425	Corpus_Luteum	Corpus_Luteum	Female_Reproductive	F	3	11	31436252	0.9528
E13_ERR2664178	426	CD4_cell	CD4_cell	Blood/Immune	F	0	12	240090069	0.9697	study 12 for PRJEB27455
E13_ERR2664179	427	CD4_cell	CD4_cell	Blood/Immune	F	0	12	263878926	0.9671
E13_ERR2664181	428	CD4_cell	CD4_cell	Blood/Immune	F	0	12	232973019	0.9689
E13_ERR2664183	426	Liver	Liver	Liver	F	3	12	242770598	0.9801
E13_ERR2664184	427	Liver	Liver	Liver	F	3	12	274307479	0.9765
E13_ERR2664185	428	Liver	Liver	Liver	F	3	12	239705621	0.9792
E13_ERR2664211	426	CD8_cell	CD8_cell	Blood/Immune	F	0	12	238404423	0.9647
E13_ERR2664212	427	CD8_cell	CD8_cell	Blood/Immune	F	0	12	241715109	0.9673
E13_ERR2664213	428	CD8_cell	CD8_cell	Blood/Immune	F	0	12	245903037	0.9657
E14_SRR1658361	429	Fetus_Brain	Fetus_Brain	CNS	F	0	13	35049721	0.9741	Study 13 for PRJNA268096
E14_SRR1658362	429	Fetus_Kidney	Fetus_Kidney	Kidney	F	0	13	40531810	0.9725
E14_SRR1658363	429	Fetus_liver	Fetus_liver	Liver	F	0	13	44085178	0.9798
E14_SRR1658364	429	Fetus_muscle	Fetus_muscle	Muscle	F	0	13	31302242	0.9772
E14_SRR1658365	430	Fetus_Brain	Fetus_Brain	CNS	F	0	13	55669992	0.9182
E14_SRR1658366	430	Fetus_Kidney	Fetus_Kidney	Kidney	F	0	13	50399731	0.969
E14_SRR1658367	430	Fetus_liver	Fetus_liver	Liver	F	0	13	65786623	0.9271
E14_SRR1658368	430	Fetus_muscle	Fetus_muscle	Muscle	F	0	13	42495952	0.9234
E14_SRR1658369	431	Fetus_Brain	Fetus_Brain	CNS	F	0	13	41030889	0.9754
E14_SRR1658370	431	Fetus_Kidney	Fetus_Kidney	Kidney	F	0	13	48879486	0.9719
E14_SRR1658371	431	Fetus_liver	Fetus_liver	Liver	F	0	13	41841332	0.9792
E14_SRR1658372	431	Fetus_muscle	Fetus_muscle	Muscle	F	0	13	33126431	0.9772
E14_SRR1658373	432	Fetus_Brain	Fetus_Brain	CNS	F	0	13	42241743	0.9754
E14_SRR1658374	432	Fetus_Kidney	Fetus_Kidney	Kidney	F	0	13	47400285	0.9679
E14_SRR1658375	432	Fetus_liver	Fetus_liver	Liver	F	0	13	43534346	0.9798
E14_SRR1658376	432	Fetus_muscle	Fetus_muscle	Muscle	F	0	13	29179600	0.9769
E14_SRR1658377	433	Fetus_Brain	Fetus_Brain	CNS	F	0	13	30420123	0.9718
E14_SRR1658378	433	Fetus_Kidney	Fetus_Kidney	Kidney	F	0	13	45832771	0.9668
E14_SRR1658379	433	Fetus_liver	Fetus_liver	Liver	F	0	13	38860749	0.9818
E14_SRR1658380	433	Fetus_muscle	Fetus_muscle	Muscle	F	0	13	32750557	0.9798
E14_SRR1658381	434	Fetus_Brain	Fetus_Brain	CNS	F	0	13	38460164	0.9749
E14_SRR1658382	434	Fetus_Kidney	Fetus_Kidney	Kidney	F	0	13	56199170	0.9581
E14_SRR1658383	434	Fetus_liver	Fetus_liver	Liver	F	0	13	34593015	0.9811
E14_SRR1658384	434	Fetus_muscle	Fetus_muscle	Muscle	F	0	13	41391913	0.9777
E14_SRR1658385	435	Fetus_Brain	Fetus_Brain	CNS	F	0	13	50611627	0.9666
E14_SRR1658386	435	Fetus_Kidney	Fetus_Kidney	Kidney	F	0	13	38014313	0.9668
E14_SRR1658387	435	Fetus_liver	Fetus_liver	Liver	F	0	13	65236037	0.9602
E14_SRR1658388	435	Fetus_muscle	Fetus_muscle	Muscle	F	0	13	56966775	0.9664
E14_SRR1658389	436	Fetus_Brain	Fetus_Brain	CNS	F	0	13	70471845	0.951
E14_SRR1658390	436	Fetus_Kidney	Fetus_Kidney	Kidney	F	0	13	45269580	0.9663
E14_SRR1658391	436	Fetus_liver	Fetus_liver	Liver	F	0	13	48441924	0.9618
E14_SRR1658392	436	Fetus_muscle	Fetus_muscle	Muscle	F	0	13	50763361	0.9435
E15_accepted_hits1_1	437	Sperm	Sperm	Sperm	M	6	14	98332537	0.87	Study 14 newly generated data in the current study
E15_accepted_hits1_2	437	Sperm	Sperm	Sperm	M	6	14	91997610	0.86
E15_accepted_hits1_3	437	Sperm	Sperm	Sperm	M	6	14	101002327	0.89
E15_accepted_hits2_1	438	Sperm	Sperm	Sperm	M	6	14	105046139	0.89
E15_accepted_hits2_2	438	Sperm	Sperm	Sperm	M	6	14	96743516	0.84
E16_SRR6912078	439	Mammary_L	Mammary	Mammary	F	3	15	79157447	0.87	Study 15 for PRJNA446068
E16_SRR6912079	440	Mammary_L	Mammary	Mammary	F	3	15	23767742	0.9849
E16_SRR6912080	441	Mammary_L	Mammary	Mammary	F	3	15	18563660	0.9887
E16_SRR6912081	442	Mammary_L	Mammary	Mammary	F	3	15	21650394	0.9875
E16_SRR6912082	443	Mammary_L	Mammary	Mammary	F	3	15	19574803	0.9867
E16_SRR6912083	444	Mammary_L	Mammary	Mammary	F	3	15	18872396	0.9869
E16_SRR6912084	445	Mammary_L	Mammary	Mammary	F	3	15	20194494	0.9872
E16_SRR6912085	446	Mammary_L	Mammary	Mammary	F	3	15	21152560	0.9858
E16_SRR6912095	447	Mammary_L	Mammary	Mammary	F	3	15	20660641	0.9894
