# Supplementary material for: Comprehensive analyses of 723 transcriptomes enhance genetic and biological interpretations for complex traits in cattle
Source: HighWire-hosted journal article supplement (doi:10.1101/gr.250704.119), 2020-05-01
Supplement: Supplemental_files.zip [file Supplemental_Table_S2.xlsx.xlsx]

## Sheet: Sheet1
Supplemental Table S2. Gene Ontology enrichment analysis for tissue-specific genes among five tissues
Tissue	GO term	Fold Enrichment	FDR
brain	nervous system development	3.24	1.67e-48
	behavior	5.19	5.67e-38
	synaptic signaling	7.78	2.65e-31
	regulation of ion transport	3.97	3.03e-20
	cognition	5.8	2.42e-20
Liver	oxidation-reduction process	4.25	8.41e-57
	organic acid metabolic process	4.92	1.33e-51
	lipid metabolic process	3.25	5.24e-27
	steroid metabolic process	6.48	1.64e-17
	cofactor metabolic process	4.22	2.3e-16
White blood cells	regulation of immune system process	3.85	7.81e-48
	lymphocyte activation	5.7	4.85e-29
	hematopoietic or lymphoid organ development	3.65	2.83e-21
	regulation of cytokine production	3.6	6.19e-21
	positive regulation of response to stimulus	2.32	9.4e-21
Uterus	embryonic morphogenesis	3.63	1.97e-20
	system development	1.99	1.83e-26
	pattern specification process	3.85	7.66e-16
	animal organ morphogenesis	3.26	9.38e-25
	skeletal system development	3.78	1.13e-16
Testes	sexual reproduction	4.01	7.17e-29
	male gamete generation	5.08	2.94e-28
	spermatogenesis	4.97	3.92e-26
	germ cell development	5.5	3.56e-19
	meiotic cell cycle	4.61	3.79e-09
