# Supplementary material for: Comprehensive analyses of 723 transcriptomes enhance genetic and biological interpretations for complex traits in cattle
Source: HighWire-hosted journal article supplement (doi:10.1101/gr.250704.119), 2020-05-01
Supplement: Supplemental_files.zip [file Supplemental_Table_S3.xlsx.xlsx]

## Sheet: Sheet1
Supplementary Table S3. Motif enrichment analysis for tissue-specific genes (within promoter regions)
Tissue	categories	TFs	Motifs	E-value (FDR)	-LOG10 (E-value)
Thymus	Immune	BATF	GKKTWSYCANWCYC	0.0028	2.55284
Prostate	Reproduction	BCL6B	GGGGCGGG	0.0021	2.67778
Tail epididymis	Reproduction	BCL6B	CCCGCCCC	2.7e-128	127.569
Fetus Brain	Neuron	BHLHE23	AAACAWAT	2.6e-07	6.58503
Anterior pituitary	Neuron	CTCFL	CCAGGGGA	5.4e-09	8.26761
Cerebral cortex	Neuron	CTCFL	CCCWGCTG	0.051	1.29243
Jejunum	Digestion	CTCFL	CCCCATGG	9.9e-108	107.004
Kidney	Gland	CTCFL	CTCCAGGG	0.027	1.56864
Medulla oblongata	Neuron	CTCFL	CCAGGGRS	0.0059	2.22915
Pons	Neuron	CTCFL	CAGGRGGA	0.0086	2.0655
Caecum	Digestion	HNF4A	TCAGTTTAKCCMAGCW	0.6	0.221849
Fetus liver	Gland	HNF4A	ATGGACAGAGGAGCCTG	2.1e-32	31.6778
Kidney	Gland	HNF4A	CTCCAGGG	0.027	1.56864
Omasum	Digestion	ISGF3G1	ACTGTTTT	0.028	1.55284
Bladder	Digestion	MYOG	GGCWGSAG	5.9e-05	4.22915
Cervical lining	Reproduction	MYOG	CYCCAGCYCTG	0.17	0.769551
Reticulum	Digestion	MYOG	GMNSCTGCDGDGCBK	0.025	1.60206
Adrenal	Gland	NFATC1	TYHTTTHTTCAAWAYAGAAAWAGAA	0.3	0.522879
Bulbourethral gland	Gland	NFATC1	CCTGKCCM	4.3e-70	69.3665
Liver	Gland	NFATC1	TCCATGGG	6.6e-155	154.18
Lymph nodes	Immune	NFATC1	CCAGGGAA	2.7e-100	99.5686
CD4	Immune	NFIC	CCCCRGSACRSTGCCWGMTAGCCTCTTC	0.044	1.35655
Lymphocyte	Immune	NFIC	GGCAAGAA	2e-126	125.699
CD8	Immune	NFKB2	AAKCYMMTG	7.7e-06	5.11351
Chorid plexus	Neuron	NFKB2	CAGGGGAT	4.4e-78	77.3565
Thymus	Immune	NKX2-5	CCACTCCAG	3.7e-89	88.4318
Lymphocyte	Immune	PAX5	GTGACCCC	3.1e-10	9.50864
Skin	Immune	PBX2	RRVASYTGSNNHTSASY	0.001	3
Anterior pituitary	Neuron	RREB1	WWTWKNWBAWRWGTRWDTRTGTGTGTGTGTGTGTGTGTK	0.32	0.49485
Cerebral cortex	Neuron	RREB1	CNCNCNYVBMCHCMCVSVSMVRSWSVCMVVSR	0.0056	2.25181
Descending Colon	Digestion	RREB1	GGGGTTGG	2.8e-11	10.5528
Medulla oblongata	Neuron	RREB1	CYCRNVYCTWYMCWCWCMCACMCHCACACACACYYMMRCNCNSMCMMCCC	0.025	1.60206
Spleen	Gland	RREB1	ACACACACACACACACACACACACACAC	0.9	0.0457575
CD8	Immune	SPIB	CAGAGGAG	1.2e-06	5.92082
Hypothalamus	Neuron	SPIB	CAGCMMMAYKCCTSTGDGGGAGY	0.37	0.431798
Pons	Neuron	SPIB	AGGCTCCTCT	9.8e-10	9.00877
Lymphocyte	Immune	SPIB	CTYCCTCT	2.3e-143	142.638
Fornix vagina	Reproduction	STAT4	AGGAAAGG	1.3e-12	11.8861
Skin	Immune	STAT4	CATTTCCT	3.8e-102	101.42
Salivary gland	Immune	TCF3	AAAAWAAA	8.3e-226	225.081
Thymus	Immune	TCF3	CAGGGGCT	0.013	1.88606
Cerebral cortex	Neuron	ZFX	GSSSSGSSSSSSSSGSSSSSGSSSSSSSSSCBSS	0.00065	3.18709
Hippocampus	Neuron	ZFX	SSBSSSSSSSSSSSSSSCNSSSSNSCSSSSSSBSSSVSSSSSGSNSCSGS	2.3e-05	4.63827
CD4	Immune	STAT1	CTTGCCTGGRR	0.2	0.69897
Lymph nodes	Immune	STAT1	CCTGGAGA	1.8e-204	203.745
