# Supplementary material for: Comprehensive analyses of 723 transcriptomes enhance genetic and biological interpretations for complex traits in cattle
Source: HighWire-hosted journal article supplement (doi:10.1101/gr.250704.119), 2020-05-01
Supplement: Supplemental_files.zip [file Supplemental_Table_S4.xlsx.xlsx]

## Sheet: Sheet1
Supplementary Table S4. The significant (FDR < 0.1) GWAS signal enrichment of complex traits across all 91 tissues and cell types
Trait	nset	p	FDR	Trait
Infundibulum	98573	0.0042	0.0807729	AFC_DYD
Pineal_gland	101036	0.0044	0.0819	AFC_DYD
Aorta	114534	0.0048	0.0832881	Body_depth
Bulbourethral_gland	83623	0.0048	0.0832881	Body_depth
Esophagus	81391	0.0011	0.0495	Body_depth
Fetus_muscle	112895	0.0068	0.0973636	Body_depth
Larynx_cartilage	60559	0.0016	0.0546	Body_depth
Reticulum	73609	0.003	0.0702	Body_depth
Rumen	81484	0.0043	0.0807729	Body_depth
Tail_epididymis	96714	0.0054	0.0891653	Body_depth
Tongue	76889	0.0013	0.0507	Body_depth
Trachea	117514	0.0015	0.0525	Body_depth
Bulbourethral_gland	83491	0.0013	0.0507	Cow_Conc_Rate
Esophagus	81164	0.0011	0.0495	Cow_Conc_Rate
Lymphocyte	70547	0.0041	0.0795711	Cow_Conc_Rate
Mammary	78483	0.001	0.0495	Cow_Conc_Rate
Vas_deferens	84599	0.0014	0.0516486	Cow_Conc_Rate
Mammary	78721	0.0032	0.0704516	Dairy_form
Muscle	87851	0.0065	0.0957464	Dairy_form
Omasum	90320	0.0011	0.0495	Dairy_form
Rumen_ephthelial_cell	80613	0.0025	0.0643868	Dairy_form
Uterine_myometrium	119568	0.0058	0.09135	Dairy_form
Esophagus	79906	0.001	0.0495	DFB_PTA
Ileum	91917	0.0008	0.0455	DFB_PTA
Mammary	77282	0.0059	0.091517	DFB_PTA
Nasal_mucosa	70105	0.0005	0.0353017	DFB_PTA
Prostrate	100411	0.0038	0.0770347	DFB_PTA
Rumen_ephthelial_cell	79424	0.0022	0.0608716	DFB_PTA
Thymus	76601	0.0026	0.0645273	DFB_PTA
Urethra	96914	0.0062	0.0940333	DFB_PTA
Vas_deferens	83495	0.003	0.0702	DFB_PTA
Adipose	99704	0.0068	0.0973636	Dtr_Calv_Ease
CD4_cell	88941	0.0021	0.0597187	Dtr_Calv_Ease
CD8_cell	89446	0.0047	0.08225	Dtr_Calv_Ease
Lung	106252	0.002	0.0585	Dtr_Calv_Ease
Lymph_nodes	92916	0.004	0.0783732	Dtr_Calv_Ease
Lymphocyte	70457	0.0019	0.0572096	Dtr_Calv_Ease
Mammary	78363	0.0003	0.0267065	Dtr_Calv_Ease
Tail_epididymis	96214	0.0034	0.0721399	Dtr_Calv_Ease
Thymus	77642	0.0002	0.0221351	Dtr_Calv_Ease
Vesicular_gland	90513	0.006	0.0920225	Dtr_Calv_Ease
Aorta	114299	0.0015	0.0525	Dtr_Preg_Rate
Rumen_ephthelial_cell	80452	0.001	0.0495	Dtr_Preg_Rate
Tail_epididymis	96436	0.0025	0.0643868	Dtr_Preg_Rate
Trachea	117302	0.0011	0.0495	Dtr_Preg_Rate
Caecum	84752	0.0053	0.0882256	Dtr_Still_Birth
CD4_cell	88872	0.0019	0.0572096	Dtr_Still_Birth
CD8_cell	89372	0.0024	0.0634065	Dtr_Still_Birth
Descending_Colon	91013	0.0015	0.0525	Dtr_Still_Birth
Duodenum	88646	0.0064	0.0953018	Dtr_Still_Birth
Fetus_liver	80946	0.0051	0.0859444	Dtr_Still_Birth
Ileum	92950	0.0058	0.09135	Dtr_Still_Birth
Jejunum	80922	0.0031	0.0704516	Dtr_Still_Birth
Lymph_nodes	92877	0	0	Dtr_Still_Birth
Lymphocyte	70416	0.0003	0.0267065	Dtr_Still_Birth
Mammary	78324	0.0003	0.0267065	Dtr_Still_Birth
Spleen	96714	0.0008	0.0455	Dtr_Still_Birth
Thymus	77605	0	0	Dtr_Still_Birth
White_blood_cells	85724	0.004	0.0783732	Dtr_Still_Birth
Larynx_cartilage	60563	0.0059	0.091517	Fat
Lymphocyte	70730	0.0017	0.0561411	Feet_and_legs
Thymus	77901	0.0013	0.0507	Feet_and_legs
CD4_cell	89245	0.0052	0.0869143	Final_score
Lymphocyte	70756	0.0002	0.0221351	Final_score
Thymus	77923	0.0007	0.0415435	Final_score
Tongue	76894	0.0023	0.06279	Final_score
Trachea	117517	0.0055	0.09009	Final_score
White_blood_cells	86064	0.0054	0.0891653	Final_score
Aorta	114525	0.0047	0.08225	Foot_angle
Esophagus	81385	0.0014	0.0516486	Foot_angle
Eye	85159	0.0043	0.0807729	Foot_angle
Liver	89017	0.0068	0.0973636	Foot_angle
Lung	106686	0.0013	0.0507	Foot_angle
Lymphocyte	70737	0.0047	0.08225	Foot_angle
Nasal_mucosa	71044	0.0059	0.091517	Foot_angle
Omasum	90330	0.001	0.0495	Foot_angle
Rumen_ephthelial_cell	80616	0.0019	0.0572096	Foot_angle
Thymus	77912	0.0024	0.0634065	Foot_angle
Aorta	114537	0.0014	0.0516486	Fore_udder_att
Diaphragm	101724	0.0039	0.0775267	Fore_udder_att
Fetus_testes	75372	0.0057	0.09135	Fore_udder_att
Gall_Bladder	100377	0.0038	0.0770347	Fore_udder_att
Lung	106697	0.0056	0.091	Fore_udder_att
Muscle	87867	0.005	0.0853125	Fore_udder_att
Rumen_ephthelial_cell	80625	0.0003	0.0267065	Fore_udder_att
Tail_epididymis	96718	0.0039	0.0775267	Fore_udder_att
Tongue	76895	0.0038	0.0770347	Fore_udder_att
Trachea	117516	0.0022	0.0608716	Fore_udder_att
Ventricle	113708	0.0055	0.09009	Fore_udder_att
Aorta	114539	0.0066	0.096525	Front_teat_pla
Fetus_muscle	112900	0.003	0.0702	Front_teat_pla
Kidney_Medulla	98247	0.0062	0.0940333	Front_teat_pla
Liver	89029	0.006	0.0920225	Front_teat_pla
Muscle	87868	0.0018	0.0567	Front_teat_pla
Ovary	116801	0.0014	0.0516486	Front_teat_pla
Rumen_ephthelial_cell	80626	0	0	Front_teat_pla
Trachea	117518	0.0015	0.0525	Front_teat_pla
Uterus	122980	0	0	Front_teat_pla
Anterior_pituitary	110095	0.0033	0.0715	GL_DYD
Bone_marrow	102606	0.0019	0.0572096	Heifer_Conc_Rate
Bulbourethral_gland	83264	0.0019	0.0572096	Heifer_Conc_Rate
Esophagus	80939	0.0002	0.0221351	Heifer_Conc_Rate
Lymphocyte	70354	0.0022	0.0608716	Heifer_Conc_Rate
Milk_cells	84089	0.0033	0.0715	Heifer_Conc_Rate
Thymus	77569	0.0017	0.0561411	Heifer_Conc_Rate
Vesicular_gland	90381	0.0002	0.0221351	Heifer_Conc_Rate
White_blood_cells	85664	0.0024	0.0634065	Heifer_Conc_Rate
Larynx_cartilage	60563	0.0051	0.0859444	Milk
Larynx_cartilage	60562	0.0032	0.0704516	Net_Merit
Mammary	78674	0.0015	0.0525	Net_Merit
Diaphragm	101711	0.004	0.0783732	Prod_Life
Esophagus	81371	0.0016	0.0546	Prod_Life
Fetus_liver	81242	0.0049	0.0843088	Prod_Life
Mammary	78693	0.0003	0.0267065	Prod_Life
Rumen_ephthelial_cell	80607	0.0007	0.0415435	Prod_Life
Tail_epididymis	96719	0.0018	0.0567	Prod_Life
Larynx_cartilage	60563	0.0029	0.0694474	Protein
Mammary	78672	0.0002	0.0221351	Protein
Reticulum	73590	0.0065	0.0957464	Protein
Bulbourethral_gland	83627	0.005	0.0853125	Rear_legs(side)
Diaphragm	101726	0.003	0.0702	Rear_legs(side)
Esophagus	81400	0.0005	0.0353017	Rear_legs(side)
Follicle	97542	0.0046	0.08225	Rear_legs(side)
Gall_Bladder	100379	0.0047	0.08225	Rear_legs(side)
Omasum	90348	0	0	Rear_legs(side)
Rumen_ephthelial_cell	80626	0.0026	0.0645273	Rear_legs(side)
Rumen	81489	0.0005	0.0353017	Rear_legs(side)
Salivary_gland	110524	0.0021	0.0597187	Rear_legs(side)
Tail_epididymis	96720	0.0018	0.0567	Rear_legs(side)
Thymus	77923	0.0043	0.0807729	Rear_legs(side)
Tongue	76895	0.0005	0.0353017	Rear_legs(side)
Ovary	116761	0.0006	0.0383906	Rear_teat_pla
Tail_epididymis	96720	0.0032	0.0704516	Rear_ud_height
Rumen	8270	0.0057	0.09135	RFI
Adipose	100139	0.0011	0.0495	Rump_angle
Aorta	114539	0.0007	0.0415435	Rump_angle
Atrium	110592	0.001	0.0495	Rump_angle
Bone_marrow	103110	0.0045	0.0819	Rump_angle
Bulbourethral_gland	83627	0.0031	0.0704516	Rump_angle
Corpus_Luteum	100608	0.0032	0.0704516	Rump_angle
Diaphragm	101726	0.0032	0.0704516	Rump_angle
Fetus_muscle	112900	0.0005	0.0353017	Rump_angle
Gall_Bladder	100379	0.0034	0.0721399	Rump_angle
Heart	92620	0.0041	0.0795711	Rump_angle
Isthmus	76145	0.0028	0.0678462	Rump_angle
Larynx_cartilage	60563	0.0027	0.0658125	Rump_angle
Lung	106698	0	0	Rump_angle
Muscle	87868	0	0	Rump_angle
Ovary	116801	0.0012	0.0506598	Rump_angle
Tail_epididymis	96720	0.0005	0.0353017	Rump_angle
Trachea	117518	0.0012	0.0506598	Rump_angle
Uterus	122980	0.002	0.0585	Rump_angle
Ventricle	113710	0.0001	0.01638	Rump_angle
Adipose	100139	0	0	Rump_width
Aorta	114539	0.0001	0.01638	Rump_width
bladder	86335	0.0013	0.0507	Rump_width
Cervical_lining	98568	0.0006	0.0383906	Rump_width
Fetus_muscle	112900	0	0	Rump_width
Follicle	97542	0.0026	0.0645273	Rump_width
Fornix_vagina	104162	0.0003	0.0267065	Rump_width
Isthmus	76145	0.0013	0.0507	Rump_width
Larynx_cartilage	60563	0.0004	0.0334286	Rump_width
Ovary	116801	0.0003	0.0267065	Rump_width
Reticulum	73614	0.0031	0.0704516	Rump_width
Rumen	81489	0.0019	0.0572096	Rump_width
Tail_epididymis	96720	0.0006	0.0383906	Rump_width
Trachea	117518	0	0	Rump_width
Ureter	87729	0.001	0.0495	Rump_width
Urethra	98455	0.0031	0.0704516	Rump_width
Uterus	122980	0.0002	0.0221351	Rump_width
CD4_cell	83193	0.0045	0.0819	SCR
CD8_cell	84021	0.0032	0.0704516	SCR
Lymph_nodes	86731	0	0	SCR
Lymphocyte	65627	0.0011	0.0495	SCR
Spleen	90453	0.0052	0.0869143	SCR
bladder	86262	0.0003	0.0267065	SCS
Bulbourethral_gland	83595	0.0059	0.091517	SCS
Esophagus	81343	0	0	SCS
Fetus_Kidney	97805	0.0027	0.0658125	SCS
Lung	106671	0.0034	0.0721399	SCS
Mammary	78676	0.0002	0.0221351	SCS
Omasum	90310	0.0017	0.0561411	SCS
Ovary	116760	0.0043	0.0807729	SCS
Reticulum	73600	0.0001	0.01638	SCS
Rumen_ephthelial_cell	80595	0.0035	0.073125	SCS
Rumen	81480	0.0001	0.01638	SCS
Salivary_gland	110476	0.0058	0.09135	SCS
Skin	81444	0.0008	0.0455	SCS
Tail_epididymis	96677	0.0047	0.08225	SCS
Ureter	87718	0.0018	0.0567	SCS
Uterine_myometrium	119515	0.0016	0.0546	SCS
Esophagus	81285	0.0023	0.06279	Sire_Calv_Ease
Mammary	78576	0.006	0.0920225	Sire_Calv_Ease
Tail_epididymis	96568	0.0045	0.0819	Sire_Calv_Ease
Tongue	76802	0.0047	0.08225	Sire_Calv_Ease
Caecum	84828	0.0001	0.01638	Sire_Still_Birth
CD4_cell	88986	0.001	0.0495	Sire_Still_Birth
CD8_cell	89475	0.0012	0.0506598	Sire_Still_Birth
Descending_Colon	91089	0.0001	0.01638	Sire_Still_Birth
Duodenum	88763	0	0	Sire_Still_Birth
Fetus_liver	81100	0.0007	0.0415435	Sire_Still_Birth
Ileum	93054	0.0005	0.0353017	Sire_Still_Birth
Jejunum	81001	0	0	Sire_Still_Birth
Lymph_nodes	92964	0	0	Sire_Still_Birth
Lymphocyte	70474	0.001	0.0495	Sire_Still_Birth
Spleen	96816	0	0	Sire_Still_Birth
Thymus	77740	0.002	0.0585	Sire_Still_Birth
White_blood_cells	85816	0.0002	0.0221351	Sire_Still_Birth
Abomasum	77016	0.0049	0.0843088	Stature
Adipose	100139	0.0014	0.0516486	Stature
Aorta	114539	0.0007	0.0415435	Stature
bladder	86335	0.0011	0.0495	Stature
Bulbourethral_gland	83627	0.0063	0.0941551	Stature
Diaphragm	101726	0.0036	0.0748325	Stature
Esophagus	81400	0.0002	0.0221351	Stature
Eye	85169	0.002	0.0585	Stature
Fetus_muscle	112900	0.0001	0.01638	Stature
Gall_Bladder	100379	0.0026	0.0645273	Stature
Isthmus	76145	0.0045	0.0819	Stature
Larynx_cartilage	60563	0.0012	0.0506598	Stature
Lung	106698	0.0037	0.0765227	Stature
Mammary	78737	0.0021	0.0597187	Stature
Milk_cells	84513	0.0024	0.0634065	Stature
Omasum	90348	0.0029	0.0694474	Stature
Reticulum	73614	0.0011	0.0495	Stature
Rumen_ephthelial_cell	80626	0.0035	0.073125	Stature
Rumen	81489	0.0013	0.0507	Stature
Tail_epididymis	96720	0.0018	0.0567	Stature
Tongue	76895	0.0006	0.0383906	Stature
Trachea	117518	0.0002	0.0221351	Stature
Ureter	87729	0.0002	0.0221351	Stature
Urethra	98455	0.0058	0.09135	Stature
Uterus	122980	0.0021	0.0597187	Stature
Vesicular_gland	90893	0.0066	0.096525	Stature
Aorta	114534	0.0038	0.0770347	Strength
Bulbourethral_gland	83621	0.0015	0.0525	Strength
Esophagus	81392	0.0003	0.0267065	Strength
Larynx_cartilage	60559	0.0045	0.0819	Strength
Reticulum	73610	0.0026	0.0645273	Strength
Rumen_ephthelial_cell	80621	0.0017	0.0561411	Strength
Rumen	81485	0.0045	0.0819	Strength
Tail_epididymis	96706	0.0063	0.0941551	Strength
Tongue	76888	0.0005	0.0353017	Strength
Trachea	117515	0.0001	0.01638	Strength
Fetus_muscle	112892	0.0013	0.0507	Teat_length
Liver	89021	0.0061	0.0932071	Teat_length
Lung	106690	0.007	0.0995313	Teat_length
Mammary	78727	0.001	0.0495	Teat_length
Muscle	87860	0.0034	0.0721399	Teat_length
Omasum	90333	0.0033	0.0715	Teat_length
Rumen_ephthelial_cell	80619	0.0012	0.0506598	Teat_length
Salivary_gland	110509	0.0006	0.0383906	Teat_length
Tail_epididymis	96707	0.0004	0.0334286	Teat_length
Uterine_myometrium	119593	0.0025	0.0643868	Teat_length
Uterus	122965	0.0002	0.0221351	Teat_length
Tail_epididymis	96720	0.0067	0.0973636	Udder_cleft
Adipose	100135	0.0026	0.0645273	Udder_depth
Aorta	114527	0.0011	0.0495	Udder_depth
Diaphragm	101714	0.0046	0.08225	Udder_depth
Esophagus	81388	0.0022	0.0608716	Udder_depth
Eye	85162	0.0063	0.0941551	Udder_depth
Fetus_Kidney	97837	0.0025	0.0643868	Udder_depth
Gall_Bladder	100368	0.001	0.0495	Udder_depth
Kidney_Cortex	103705	0.0065	0.0957464	Udder_depth
Liver	89021	0.0043	0.0807729	Udder_depth
Mammary	78727	0.0014	0.0516486	Udder_depth
Milk_cells	84498	0.0058	0.09135	Udder_depth
Muscle	87860	0.0012	0.0506598	Udder_depth
Omasum	90333	0.0035	0.073125	Udder_depth
Rumen_ephthelial_cell	80619	0.0004	0.0334286	Udder_depth
Tail_epididymis	96707	0.0018	0.0567	Udder_depth
Tongue	76886	0.0039	0.0775267	Udder_depth
Trachea	117509	0.0068	0.0973636	Udder_depth
Uterus	122965	0.0046	0.08225	Udder_depth
Ventricle	113701	0.0031	0.0704516	Udder_depth
Esophagus	80746	0.0006	0.0383906	UU_DSAB_final
Omasum	89729	0.0024	0.0634065	UU_DSAB_final
Thymus	77849	0.0068	0.0973636	UU_DSAB_final
Lymphocyte	70680	0.0051	0.0859444	UU_KETO_final
Thymus	77900	0.0027	0.0658125	UU_KETO_final
Ileum	93406	0.0039	0.0775267	UU_Livabitity_final
Lymphocyte	70810	0.0058	0.09135	UU_Livabitity_final
Thymus	77968	0.007	0.0995313	UU_Livabitity_final
Anterior_pituitary	109980	0.0043	0.0807729	UU_MAST_final
Esophagus	80902	0.0005	0.0353017	UU_MAST_final
Ovary	116054	0.0001	0.01638	UU_MAST_final
Tail_epididymis	96140	0.0063	0.0941551	UU_MAST_final
Corpus_Luteum	100329	0.0056	0.091	UU_RETP_final
