# Supplementary material for: Comprehensive analyses of 723 transcriptomes enhance genetic and biological interpretations for complex traits in cattle
Source: HighWire-hosted journal article supplement (doi:10.1101/gr.250704.119), 2020-05-01
Supplement: Supplemental_files.zip [file Supplemental_Table_S5.xlsx.xlsx]

## Sheet: Sheet1
Supplementary Table S5. The top three expressed tissues for fine-mapped genes across 45 complex traits in cattle
Gene	Trait	Gene.stable.ID	Chromosome.scaffold.name	Gene.start..bp.	Gene.end..bp.	Gene.type	Gene_PPC	Top_Tissue
AFF1	AFC_DYD	ENSBTAG00000018488	6	103688011	103825580	protein_coding	0.0133851	Uterine_myometrium; Sperm; Skin
BAX	AFC_DYD	ENSBTAG00000013340	18	55985202	55989378	protein_coding	0.0717434	Rumen_ephthelial_cell; Ileum; Caecum
CCDC155	AFC_DYD	ENSBTAG00000008614	18	56310915	56332899	protein_coding	0.023557	Testes; Infundibulum; Fetus_testes
DHDH	AFC_DYD	ENSBTAG00000013337	18	55964768	55975730	protein_coding	0.257647	Pons; SME; Frontal_cortex
FCGRT	AFC_DYD	ENSBTAG00000013926	18	56415700	56421861	protein_coding	0.0246734	Bone_marrow; Vesicular_gland; Adipose
FTL	AFC_DYD	ENSBTAG00000013343	18	55992910	55994741	protein_coding	0.0717434	Kidney; Milk_cells; Kidney_Cortex
GYS1	AFC_DYD	ENSBTAG00000039958	18	55996079	56012727	protein_coding	0.169452	Chorid_plexus; Muscle; Larynx_cartilage
KLHL8	AFC_DYD	ENSBTAG00000002455	6	103844033	103871753	protein_coding	0.0919974	Sperm; Milk_cells; Fetus_Brain
MAPK10	AFC_DYD	ENSBTAG00000020048	6	102687307	103063481	protein_coding	0.192123	Cerebral_cortex; Brain; Brain_lobe
PPFIA3	AFC_DYD	ENSBTAG00000002844	18	56090692	56106714	protein_coding	0.071744	Hippocampus; Frontal_cortex; Fetus_Brain
PPP1R15A	AFC_DYD	ENSBTAG00000001294	18	55925891	55929294	protein_coding	0.0648751	Ureter; Milk_cells; CD8_cell
PTPN13	AFC_DYD	ENSBTAG00000014947	6	103374250	103511357	protein_coding	0.672713	Fetus_Kidney; Sperm; Kidney
PTPN13	AFC_DYD	ENSBTAG00000046971	11	5754349	5776837	protein_coding	0.672713	Fetus_Kidney; Ampulla; SME
RPL13A	AFC_DYD	ENSBTAG00000005296	18	56394558	56398082	protein_coding	0.0246691	Rumen; CD4_cell; CD8_cell
TULP2	AFC_DYD	ENSBTAG00000002368	18	55930396	55938573	protein_coding	0.0648751	Testes; Sperm; Fetus_testes
ACSBG2	Body_depth	ENSBTAG00000009105	7	19462467	19499738	protein_coding	0.0107038	Testes; Sperm; Epididymis
ACTN3	Body_depth	ENSBTAG00000022244	29	45230682	45242282	protein_coding	0.0254337	Chorid_plexus; Muscle; Larynx_cartilage
ARRDC3	Body_depth	ENSBTAG00000007116	7	93240419	93253094	protein_coding	0.438917	Uterine_myometrium; Spleen; White_blood_cells
C29H11orf86	Body_depth	ENSBTAG00000022246	29	45624666	45626149	protein_coding	0.0189789	Liver; Ileum; Kidney
CCND2	Body_depth	ENSBTAG00000016649	5	106253907	106276819	protein_coding	0.988058	Rumen_ephthelial_cell; White_blood_cells; Colon
CDC14B	Body_depth	ENSBTAG00000011589	8	84629264	84748968	protein_coding	0.0163976	Tail_epididymis; Fetus_Kidney; Testes
CHST11	Body_depth	ENSBTAG00000010644	5	68385645	68645774	protein_coding	0.0618466	Milk_cells; CD8_cell; White_blood_cells
FGF23	Body_depth	ENSBTAG00000030343	5	106208179	106216757	protein_coding	0.0101218	Sperm; Thymus; Ovary
FGF6	Body_depth	ENSBTAG00000006800	5	106157909	106169922	protein_coding	0.98364	Fetus_muscle; Sperm; Muscle
HABP4	Body_depth	ENSBTAG00000011586	8	84579583	84615685	protein_coding	0.297078	Fetus_Kidney; Kidney_Cortex; Kidney
HCFC2	Body_depth	ENSBTAG00000020933	5	68052161	68097172	protein_coding	0.172721	Sperm; Thymus; Cerebellum
IARS	Body_depth	ENSBTAG00000000974	8	85268890	85350117	protein_coding	0.046769	Rumen_ephthelial_cell; Sperm; Fetus_Kidney
NFYB	Body_depth	ENSBTAG00000030744	5	68109725	68127878	protein_coding	0.0172177	Sperm; Fetus_muscle; Fetus_Kidney
PC	Body_depth	ENSBTAG00000019700	29	45508280	45611042	protein_coding	0.116709	Kidney; Kidney_Cortex; Bulbourethral_gland
PELI3	Body_depth	ENSBTAG00000021097	29	45153624	45162953	protein_coding	0.0600724	Frontal_cortex; Vesicular_gland; Cerebral_cortex
RCE1	Body_depth	ENSBTAG00000019696	29	45503291	45506372	protein_coding	0.662348	Isthmus; Cervical_lining; Bulbourethral_gland
SAFB	Body_depth	ENSBTAG00000007875	7	19846208	19876661	protein_coding	0.383133	White_blood_cells; CD8_cell; CD4_cell
SAFB2	Body_depth	ENSBTAG00000001790	7	19908341	19936959	protein_coding	0.149127	CD4_cell; CD8_cell; White_blood_cells
SLC35D2	Body_depth	ENSBTAG00000019939	8	84451887	84508206	protein_coding	0.0594983	Fetus_Kidney; Kidney_Cortex; Ileum
STAB2	Body_depth	ENSBTAG00000006010	5	67612447	67784730	protein_coding	0.66466	Lymph_nodes; Fetus_liver; Adrenal
ZNF367	Body_depth	ENSBTAG00000006587	8	84514066	84537863	protein_coding	0.142782	White_blood_cells; Ileum; Testes
ZNF484	Body_depth	ENSBTAG00000031682	8	85224607	85232666	protein_coding	0.0261917	Cerebellum; Uterine_myometrium; Fetus_Brain
ZNF613	Body_depth	ENSBTAG00000038487	18	58130465	58141877	protein_coding	0.843986	Thyroid; Thymus; Skin
CCDC88C	Cow_Conc_Rate	ENSBTAG00000000838	21	56629747	56773304	protein_coding	0.160271	CD8_cell; CD4_cell; White_blood_cells
CTSD	Cow_Conc_Rate	ENSBTAG00000007622	29	50352064	50361497	protein_coding	0.0101383	Milk_cells; Ileum; Larynx_cartilage
FBLN5	Cow_Conc_Rate	ENSBTAG00000018123	21	57153110	57246389	protein_coding	0.824747	Trachea; Aorta; Tail_epididymis
GC	Cow_Conc_Rate	ENSBTAG00000013718	6	88695940	88739180	protein_coding	0.999697	Fetus_liver; Liver; Fetus_Kidney
HEG1	Cow_Conc_Rate	ENSBTAG00000021396	1	70027330	70106415	protein_coding	0.159393	Lung; Adipose; Fetus_muscle
ITGB5	Cow_Conc_Rate	ENSBTAG00000013755	1	69801844	69899676	protein_coding	0.149834	Corpus_Luteum; Tail_epididymis; Gall_Bladder
KALRN	Cow_Conc_Rate	ENSBTAG00000002640	1	69248613	69724961	protein_coding	0.540991	Testes; Fetus_Brain; Brain
LSP1	Cow_Conc_Rate	ENSBTAG00000010447	29	50238211	50276209	protein_coding	0.0152944	CD8_cell; CD4_cell; Lymphocyte
MRPL23	Cow_Conc_Rate	ENSBTAG00000000103	29	50182529	50187374	protein_coding	0.0500256	Kidney; Liver; Kidney_Cortex
NADSYN1	Cow_Conc_Rate	ENSBTAG00000016470	29	48955480	48983276	protein_coding	0.0103615	Ileum; Pineal_gland; bladder
UMPS	Cow_Conc_Rate	ENSBTAG00000013727	1	69732778	69782823	protein_coding	0.082563	Corpus_Luteum; Diaphragm; Gall_Bladder
ZNF613	Cow_Conc_Rate	ENSBTAG00000038487	18	58130465	58141877	protein_coding	0.325376	Thyroid; Thymus; Skin
ABCC9	Dairy_form	ENSBTAG00000019294	5	88677586	88831324	protein_coding	0.998947	Sperm; Fetus_muscle; Endometrium
ADAMTSL4	Dairy_form	ENSBTAG00000003604	3	20187039	20195550	protein_coding	0.570632	Trachea; Aorta; Larynx_cartilage
ARID5B	Dairy_form	ENSBTAG00000006729	28	18003736	18191994	protein_coding	0.126176	White_blood_cells; Milk_cells; Thymus
CCDC88C	Dairy_form	ENSBTAG00000000838	21	56629747	56773304	protein_coding	0.921119	CD8_cell; CD4_cell; White_blood_cells
CTSS	Dairy_form	ENSBTAG00000017135	3	20024302	20047228	protein_coding	0.0437391	Lymph_nodes; Milk_cells; Spleen
GC	Dairy_form	ENSBTAG00000013718	6	88695940	88739180	protein_coding	0.0366206	Fetus_liver; Liver; Fetus_Kidney
PPP4R3A	Dairy_form	ENSBTAG00000005040	21	56800878	56835145	protein_coding	0.0627271	CD4_cell; CD8_cell; White_blood_cells
RPRD2	Dairy_form	ENSBTAG00000014984	3	20254979	20345588	protein_coding	0.191944	Uterine_myometrium; White_blood_cells; Testes
TARS2	Dairy_form	ENSBTAG00000003799	3	20234451	20246077	protein_coding	0.183359	CD8_cell; CD4_cell; Trachea
ZNF331	Dairy_form	ENSBTAG00000016513	18	61020212	61032896	protein_coding	0.371954	Anterior_pituitary; Pineal_gland; Posterior_pituitary
ZNF677	Dairy_form	ENSBTAG00000038674	18	60330959	60344819	protein_coding	0.134642	Ovary; Thyroid; Thymus
CCDC88C	DFB_PTA	ENSBTAG00000000838	21	56629747	56773304	protein_coding	0.997075	CD8_cell; CD4_cell; White_blood_cells
CHST8	DFB_PTA	ENSBTAG00000047670	18	44305869	44378890	protein_coding	0.888913	Pineal_gland; Anterior_pituitary; SME
CTU1	DFB_PTA	ENSBTAG00000039212	18	57517497	57524958	protein_coding	0.197168	Ileum; Frontal_cortex; Mammary
FAM71E1	DFB_PTA	ENSBTAG00000020082	18	57066061	57071540	protein_coding	0.0387632	Testes; Sperm; Pons
GC	DFB_PTA	ENSBTAG00000013718	6	88695940	88739180	protein_coding	0.181559	Fetus_liver; Liver; Fetus_Kidney
GPI	DFB_PTA	ENSBTAG00000006396	18	44979578	45007642	protein_coding	0.029439	Chorid_plexus; Hippocampus; Muscle
KIAA0355	DFB_PTA	ENSBTAG00000013175	18	44917050	44969117	protein_coding	0.0248665	Uterine_myometrium; Endometrium; Uterus
KLK13	DFB_PTA	ENSBTAG00000009382	18	57477240	57484854	protein_coding	0.0264608	Esophagus; Tongue; Eye
KLK14	DFB_PTA	ENSBTAG00000012538	18	57495324	57499297	protein_coding	0.0354587	Tongue; Esophagus; Eye
NPFFR2	DFB_PTA	ENSBTAG00000009070	6	89052210	89059348	protein_coding	0.02598	Sperm; Brain_lobe; bladder
WTIP	DFB_PTA	ENSBTAG00000007841	18	45075880	45101465	protein_coding	0.0244333	Adipose; Ureter; Lung
ZNF613	DFB_PTA	ENSBTAG00000038487	18	58130465	58141877	protein_coding	0.166148	Thyroid; Thymus; Skin
CHCHD3	DSAB	ENSBTAG00000024723	4	97318802	97612111	protein_coding	0.0402125	Heart; Chorid_plexus; Muscle
EXOC4	DSAB	ENSBTAG00000014112	4	97791626	98594890	protein_coding	0.0522912	Fetus_Brain; SME; Ampulla
FANCC	DSAB	ENSBTAG00000017195	8	83023629	83270596	protein_coding	0.788698	Sperm; Thyroid; Endometrium
FANCC	DSAB	ENSBTAG00000017195	8	83023629	83270596	protein_coding	0.777567	Sperm; Thyroid; Endometrium
FBP1	DSAB	ENSBTAG00000009733	8	82460864	82491694	protein_coding	0.0219492	Kidney_Cortex; Kidney; Liver
NTM	DSAB	ENSBTAG00000010032	29	35154689	35575203	protein_coding	0.994423	Diencephalon; Fetus_Brain; Cerebral_cortex
PLXNA4	DSAB	ENSBTAG00000014543	4	96581220	97047201	protein_coding	0.490933	Fetus_Brain; Brain; Frontal_cortex
ARRDC3	Dtr_Calv_Ease	ENSBTAG00000007116	7	93240419	93253094	protein_coding	0.905882	Uterine_myometrium; Spleen; White_blood_cells
C1QTNF7	Dtr_Calv_Ease	ENSBTAG00000010343	6	115276058	115404039	protein_coding	0.0101761	Aorta; Ureter; Urethra
CHEK2	Dtr_Calv_Ease	ENSBTAG00000004956	17	70269592	70305247	protein_coding	0.645535	Endometrium; Fetus_Kidney; Ileum
ESR1	Dtr_Calv_Ease	ENSBTAG00000007159	9	89969586	90255801	protein_coding	0.970866	Endometrium; Ampulla; Uterus
MN1	Dtr_Calv_Ease	ENSBTAG00000010464	17	69431677	69478074	protein_coding	0.172661	Fetus_Brain; Chorid_plexus; Muscle
PITPNB	Dtr_Calv_Ease	ENSBTAG00000017799	17	69527044	69588470	protein_coding	0.0649828	Thymus; Lymph_nodes; Tail_epididymis
SYNE1	Dtr_Calv_Ease	ENSBTAG00000009362	9	90276613	90670346	protein_coding	0.024514	CD8_cell; Fetus_muscle; CD4_cell
TTC28	Dtr_Calv_Ease	ENSBTAG00000012193	17	69656038	69933993	protein_coding	0.999956	Fetus_Brain; Uterine_myometrium; Ampulla
TTC28	Dtr_Calv_Ease	ENSBTAG00000012193	17	69656038	69933993	protein_coding	0.0653457	Fetus_Brain; Uterine_myometrium; Ampulla
ZNF613	Dtr_Calv_Ease	ENSBTAG00000038487	18	58130465	58141877	protein_coding	0.0280029	Thyroid; Thymus; Skin
ABCC9	Dtr_Preg_Rate	ENSBTAG00000019294	5	88677586	88831324	protein_coding	0.999963	Sperm; Fetus_muscle; Endometrium
CD276	Dtr_Preg_Rate	ENSBTAG00000019734	10	20341750	20354153	protein_coding	0.99983	Adipose; Bulbourethral_gland; Gall_Bladder
ITGB5	Dtr_Preg_Rate	ENSBTAG00000013755	1	69801844	69899676	protein_coding	0.0371145	Corpus_Luteum; Tail_epididymis; Gall_Bladder
KALRN	Dtr_Preg_Rate	ENSBTAG00000002640	1	69248613	69724961	protein_coding	0.91708	Testes; Fetus_Brain; Brain
NADSYN1	Dtr_Preg_Rate	ENSBTAG00000016470	29	48955480	48983276	protein_coding	0.645007	Ileum; Pineal_gland; bladder
NAP1L4	Dtr_Preg_Rate	ENSBTAG00000022160	29	49264642	49316917	protein_coding	0.131585	Infundibulum; Ampulla; Hippocampus
SHANK2	Dtr_Preg_Rate	ENSBTAG00000003171	29	48217044	48378574	protein_coding	0.0672421	Mammary; Fetus_Brain; Frontal_cortex
SLC12A8	Dtr_Preg_Rate	ENSBTAG00000000496	1	70126992	70250895	protein_coding	0.0191167	Ascending_colon; Salivary_gland; Colon
ABCG2	Fat	ENSBTAG00000017704	6	37913110	38030583	protein_coding	0.861619	Endometrium; Vesicular_gland; Cervical_lining
CCDC57	Fat	ENSBTAG00000019321	19	51271301	51351984	protein_coding	0.998677	Infundibulum; CD8_cell; CD4_cell
CXCR2	Fat	ENSBTAG00000038042	2	106906773	106914272	protein_coding	0.015464	Milk_cells; White_blood_cells; Esophagus
MGST1	Fat	ENSBTAG00000008541	5	93926791	93950162	protein_coding	1	Thyroid; Vesicular_gland; Bone_marrow
SCD	Fat	ENSBTAG00000045728	26	21141592	21148318	protein_coding	0.999704	Adipose; Mammary; Corpus_Luteum
ABCG2	Fat_Percent	ENSBTAG00000017704	6	37913110	38030583	protein_coding	0.996291	Endometrium; Vesicular_gland; Cervical_lining
ADAM15	Fat_Percent	ENSBTAG00000010663	3	15593459	15603312	protein_coding	0.277776	Ureter; Rumen; Adipose
ASH1L	Fat_Percent	ENSBTAG00000003954	3	15176831	15353404	protein_coding	0.685612	Thymus; Brain_lobe; Thyroid
CCL28	Fat_Percent	ENSBTAG00000001557	20	31391483	31409955	protein_coding	0.0747043	Prostrate; Salivary_gland; Eye
DCST1	Fat_Percent	ENSBTAG00000010655	3	15603805	15619232	protein_coding	0.128247	Testes; Sperm; Ileum
DCST2	Fat_Percent	ENSBTAG00000010638	3	15619491	15636992	protein_coding	0.175219	Testes; Sperm; Rumen
DPM3	Fat_Percent	ENSBTAG00000003535	3	15517158	15517733	protein_coding	0.0148664	Ileum; Rumen; Heart
EFNA1	Fat_Percent	ENSBTAG00000020244	3	15521494	15528093	protein_coding	0.070181	Urethra; Prostrate; Thyroid
EFNA4	Fat_Percent	ENSBTAG00000010673	3	15587570	15591685	protein_coding	0.145801	Reticulum; Abomasum; Skin
FASN	Fat_Percent	ENSBTAG00000015980	19	51384922	51403614	protein_coding	0.998475	Adipose; Mammary; Milk_cells
FLAD1	Fat_Percent	ENSBTAG00000000186	3	15658831	15664782	protein_coding	0.0223233	Rumen; RumenPapillae; Infundibulum
GBA	Fat_Percent	ENSBTAG00000014841	3	15445102	15463930	protein_coding	0.0350133	SME; Tail_epididymis; Diaphragm
GHR	Fat_Percent	ENSBTAG00000001335	20	31890736	32199996	protein_coding	0.219362	Liver; Bone_marrow; Adipose
GON4L	Fat_Percent	ENSBTAG00000020356	3	15009727	15093527	protein_coding	0.106522	Testes; White_blood_cells; CD4_cell
GPAT4	Fat_Percent	ENSBTAG00000005730	27	36212255	36229009	protein_coding	0.994913	Larynx_cartilage; Mammary; Testes
HMGCS1	Fat_Percent	ENSBTAG00000011839	20	31451386	31474239	protein_coding	0.192948	Diaphragm; Gall_Bladder; Corpus_Luteum
HSD17B12	Fat_Percent	ENSBTAG00000000087	15	74652043	74830690	protein_coding	0.999949	Corpus_Luteum; Diaphragm; Gall_Bladder
IVNS1ABP	Fat_Percent	ENSBTAG00000014249	16	67765816	67785616	protein_coding	0.193649	Tongue; CD4_cell; Muscle
MGST1	Fat_Percent	ENSBTAG00000008541	5	93926791	93950162	protein_coding	0.387652	Thyroid; Vesicular_gland; Bone_marrow
MGST1	Fat_Percent	ENSBTAG00000008541	5	93926791	93950162	protein_coding	1	Thyroid; Vesicular_gland; Bone_marrow
NIM1K	Fat_Percent	ENSBTAG00000006233	20	31484954	31510630	protein_coding	0.192948	Cerebral_cortex; Hippocampus; Frontal_cortex
PAEP	Fat_Percent	ENSBTAG00000014678	11	103301664	103306381	protein_coding	0.99626	Milk_cells; Mammary; Jejunum
SCD	Fat_Percent	ENSBTAG00000045728	26	21141592	21148318	protein_coding	0.999994	Adipose; Mammary; Corpus_Luteum
SWT1	Fat_Percent	ENSBTAG00000004492	16	67653941	67759357	protein_coding	0.806342	Sperm; CD4_cell; White_blood_cells
THBS3	Fat_Percent	ENSBTAG00000000057	3	15470302	15480443	protein_coding	0.0217475	Fetus_muscle; Tail_epididymis; Infundibulum
TRIM46	Fat_Percent	ENSBTAG00000010622	3	15488474	15498217	protein_coding	0.0134167	Hippocampus; Frontal_cortex; Diencephalon
ZBTB7B	Fat_Percent	ENSBTAG00000021512	3	15634915	15648928	protein_coding	0.170348	Rumen; RumenPapillae; Reticulum
ZNF131	Fat_Percent	ENSBTAG00000015504	20	31571710	31578258	protein_coding	0.0322375	Thymus; CD4_cell; Uterine_myometrium
HABP4	Final_score	ENSBTAG00000011586	8	84579583	84615685	protein_coding	0.722564	Fetus_Kidney; Kidney_Cortex; Kidney
SYT8	Final_score	ENSBTAG00000040103	29	50289094	50293879	protein_coding	0.999997	Larynx_cartilage; Lymphocyte; Mammary
TMTC2	Final_score	ENSBTAG00000002888	5	12460330	12563124	protein_coding	0.945102	Sperm; Uterine_myometrium; Fetus_muscle
WNK2	Final_score	ENSBTAG00000008301	8	85984692	86130645	protein_coding	0.177907	Larynx_cartilage; Chorid_plexus; Prostrate
CTU1	Foot_angle	ENSBTAG00000039212	18	57517497	57524958	protein_coding	0.0122464	Ileum; Frontal_cortex; Mammary
POLD1	Foot_angle	ENSBTAG00000011083	18	57014868	57028488	protein_coding	0.976407	Ileum; Fetus_liver; CD8_cell
SYT8	Foot_angle	ENSBTAG00000040103	29	50289094	50293879	protein_coding	0.998317	Larynx_cartilage; Lymphocyte; Mammary
ABCC9	Fore_udder_att	ENSBTAG00000019294	5	88677586	88831324	protein_coding	1	Sperm; Fetus_muscle; Endometrium
ADGRV1	Fore_udder_att	ENSBTAG00000006031	7	92510676	92699410	protein_coding	0.0305778	Sperm; Fetus_Brain; Uterine_myometrium
APCDD1L	Fore_udder_att	ENSBTAG00000020397	13	58439175	58446547	protein_coding	0.0691599	Fetus_Kidney; bladder; Eye
C13H20orf85	Fore_udder_att	ENSBTAG00000016926	13	58709492	58725285	protein_coding	0.52224	Infundibulum; Testes; Ampulla
DHCR7	Fore_udder_att	ENSBTAG00000016465	29	48930324	48950644	protein_coding	0.0132671	Gall_Bladder; Diaphragm; Corpus_Luteum
EFEMP1	Fore_udder_att	ENSBTAG00000017448	11	38338744	38408288	protein_coding	0.245335	Kidney_Cortex; Ureter; Trachea
LSP1	Fore_udder_att	ENSBTAG00000010447	29	50238211	50276209	protein_coding	0.0100255	CD8_cell; CD4_cell; Lymphocyte
RAB11FIP2	Fore_udder_att	ENSBTAG00000007460	26	38617113	38657253	protein_coding	0.137527	Thyroid; Thymus; Brain_lobe
SCAPER	Fore_udder_att	ENSBTAG00000007382	21	32118828	32512606	protein_coding	0.999395	Fetus_Brain; Sperm; SME
SYT8	Fore_udder_att	ENSBTAG00000040103	29	50289094	50293879	protein_coding	0.011004	Larynx_cartilage; Lymphocyte; Mammary
TMTC2	Fore_udder_att	ENSBTAG00000002888	5	12460330	12563124	protein_coding	0.94622	Sperm; Uterine_myometrium; Fetus_muscle
BICD2	Front_teat_pla	ENSBTAG00000046549	8	85692416	85743419	protein_coding	0.0512123	Rumen; Skin; Lung
ETFA	Front_teat_pla	ENSBTAG00000012490	21	31993940	32063870	protein_coding	0.037684	Rumen; RumenPapillae; Diaphragm
FANCC	Front_teat_pla	ENSBTAG00000017195	8	83023629	83270596	protein_coding	0.269393	Sperm; Thyroid; Endometrium
RAB11FIP2	Front_teat_pla	ENSBTAG00000007460	26	38617113	38657253	protein_coding	0.828132	Thyroid; Thymus; Brain_lobe
SCAPER	Front_teat_pla	ENSBTAG00000007382	21	32118828	32512606	protein_coding	0.768724	Fetus_Brain; Sperm; SME
TMEM266	Front_teat_pla	ENSBTAG00000012489	21	31860207	31983703	protein_coding	0.0765413	Cerebellum; Fetus_testes; Muscle
TMTC2	Front_teat_pla	ENSBTAG00000002888	5	12460330	12563124	protein_coding	1	Sperm; Uterine_myometrium; Fetus_muscle
TMTC2	Front_teat_pla	ENSBTAG00000002888	5	12460330	12563124	protein_coding	0.0861633	Sperm; Uterine_myometrium; Fetus_muscle
ADCK5	GL	ENSBTAG00000011064	14	1742714	1756301	protein_coding	0.104	Tail_epididymis; Fetus_testes; Jejunum
ARHGAP39	GL	ENSBTAG00000007186	14	1563866	1600378	protein_coding	0.097	Infundibulum; Frontal_cortex; Ampulla
ARID4B	GL	ENSBTAG00000000222	28	7972951	8109684	protein_coding	0.183	Thymus; White_blood_cells; CD4_cell
BOP1	GL	ENSBTAG00000009811	14	1825982	1844587	protein_coding	0.064	Bulbourethral_gland; Rumen; Rumen_ephthelial_cell
CDKL1	GL	ENSBTAG00000004780	10	43278649	43329674	protein_coding	0.191	Kidney_Medulla; Kidney; Kidney_Cortex
CPSF1	GL	ENSBTAG00000008355	14	1728207	1742670	protein_coding	0.13	Fetus_testes; CD4_cell; CD8_cell
CYSTM1	GL	ENSBTAG00000016595	7	53047810	53118491	protein_coding	0.881	Thyroid; bladder; Kidney
DGAT1	GL	ENSBTAG00000026356	14	1795351	1804562	protein_coding	0.1	Bone_marrow; Adipose; Jejunum
DNAH2	GL	ENSBTAG00000008605	19	28027092	28134582	protein_coding	0.124	Testes; Infundibulum; Ampulla
HCFC2	GL	ENSBTAG00000020933	5	68052161	68097172	protein_coding	0.235	Sperm; Thymus; Cerebellum
HSF1	GL	ENSBTAG00000020751	14	1806081	1825793	protein_coding	0.206	Chorid_plexus; Muscle; Larynx_cartilage
MROH1	GL	ENSBTAG00000014458	14	1844664	1894424	protein_coding	0.064	Testes; Pineal_gland; Infundibulum
MYH10	GL	ENSBTAG00000021151	19	28680825	28800880	protein_coding	1	Trachea; Aorta; Rumen_ephthelial_cell
NDEL1	GL	ENSBTAG00000011994	19	28637771	28672316	protein_coding	0.286	Anterior_pituitary; Kidney; Cerebral_cortex
NFYB	GL	ENSBTAG00000030744	5	68109725	68127878	protein_coding	0.239	Sperm; Fetus_muscle; Fetus_Kidney
NRG2	GL	ENSBTAG00000010689	7	52714639	52774754	protein_coding	0.154	Uterus; Uterine_myometrium; Salivary_gland
PCDHA13	GL	ENSBTAG00000030227	7	53663779	53787480	protein_coding	1	Brain_lobe; Cerebellum; Fetus_Brain
SCRT1	GL	ENSBTAG00000046208	14	1782901	1788087	protein_coding	0.107	Frontal_cortex; Cerebellum; Brain
SLC39A4	GL	ENSBTAG00000046026	14	1719732	1724220	protein_coding	0.119	Ileum; Caecum; Fetus_testes
SLC52A2	GL	ENSBTAG00000000857	14	1763994	1766621	protein_coding	0.109	Gall_Bladder; Diaphragm; Fetus_testes
WWP2	GL	ENSBTAG00000018421	18	36955238	37096910	protein_coding	0.251	Larynx_cartilage; Trachea; Aorta
ZNF16	GL	ENSBTAG00000016203	14	1445334	1456750	protein_coding	0.08	Fetus_Brain; Hypothalamus; Diencephalon
ZNF613	GL	ENSBTAG00000038487	18	58130465	58141877	protein_coding	0.999	Thyroid; Thymus; Skin
AFF1	Heifer_Conc_Rate	ENSBTAG00000018488	6	103688011	103825580	protein_coding	0.424449	Uterine_myometrium; Sperm; Skin
CETN3	Heifer_Conc_Rate	ENSBTAG00000014373	7	92290239	92307723	protein_coding	0.184579	Epididymis; Fetus_testes; Infundibulum
CTU1	Heifer_Conc_Rate	ENSBTAG00000039212	18	57517497	57524958	protein_coding	0.074944	Ileum; Frontal_cortex; Mammary
KLHL8	Heifer_Conc_Rate	ENSBTAG00000002455	6	103844033	103871753	protein_coding	0.45953	Sperm; Milk_cells; Fetus_Brain
KLK14	Heifer_Conc_Rate	ENSBTAG00000012538	18	57495324	57499297	protein_coding	0.0128057	Tongue; Esophagus; Eye
MAPK10	Heifer_Conc_Rate	ENSBTAG00000020048	6	102687307	103063481	protein_coding	0.0280209	Cerebral_cortex; Brain; Brain_lobe
PTPN13	Heifer_Conc_Rate	ENSBTAG00000014947	6	103374250	103511357	protein_coding	0.0666853	Fetus_Kidney; Sperm; Kidney
PTPN13	Heifer_Conc_Rate	ENSBTAG00000046971	11	5754349	5776837	protein_coding	0.0666853	Fetus_Kidney; Ampulla; SME
ZNF613	Heifer_Conc_Rate	ENSBTAG00000038487	18	58130465	58141877	protein_coding	0.18627	Thyroid; Thymus; Skin
CYC1	KETO	ENSBTAG00000012232	14	1930186	1932580	protein_coding	0.0152128	Heart; Larynx_cartilage; Rumen
DGAT1	KETO	ENSBTAG00000026356	14	1795351	1804562	protein_coding	0.0840481	Bone_marrow; Adipose; Jejunum
EXOSC4	KETO	ENSBTAG00000014607	14	1947198	1949074	protein_coding	0.0801415	Rumen_ephthelial_cell; Testes; Isthmus
GRINA	KETO	ENSBTAG00000000312	14	2018559	2021709	protein_coding	0.130809	Hippocampus; Cerebral_cortex; Frontal_cortex
HSF1	KETO	ENSBTAG00000020751	14	1806081	1825793	protein_coding	0.0761477	Chorid_plexus; Muscle; Larynx_cartilage
MROH1	KETO	ENSBTAG00000014458	14	1844664	1894424	protein_coding	0.0374699	Testes; Pineal_gland; Infundibulum
OPLAH	KETO	ENSBTAG00000017281	14	1957554	1966646	protein_coding	0.0602745	Kidney; Kidney_Cortex; Larynx_cartilage
PARP10	KETO	ENSBTAG00000009677	14	2024713	2031386	protein_coding	0.16509	CD8_cell; CD4_cell; Lymphocyte
SCRT1	KETO	ENSBTAG00000046208	14	1782901	1788087	protein_coding	0.0129621	Frontal_cortex; Cerebellum; Brain
SHARPIN	KETO	ENSBTAG00000012235	14	1925026	1929354	protein_coding	0.0152527	Testes; Isthmus; Larynx_cartilage
SLC52A2	KETO	ENSBTAG00000000857	14	1763994	1766621	protein_coding	0.0764574	Gall_Bladder; Diaphragm; Fetus_testes
TMEM249	KETO	ENSBTAG00000035158	14	1770660	1772329	protein_coding	0.0338636	Testes; Urethra; Kidney
ABCC9	Livability	ENSBTAG00000019294	5	88677586	88831324	protein_coding	0.999503	Sperm; Fetus_muscle; Endometrium
ADAMTS3	Livability	ENSBTAG00000006507	6	89162542	89460195	protein_coding	0.0102252	Sperm; Fetus_Brain; Rumen_ephthelial_cell
CCDC88C	Livability	ENSBTAG00000000838	21	56629747	56773304	protein_coding	0.945289	CD8_cell; CD4_cell; White_blood_cells
GC	Livability	ENSBTAG00000013718	6	88695940	88739180	protein_coding	0.0168284	Fetus_liver; Liver; Fetus_Kidney
GC	Livability	ENSBTAG00000013718	6	88695940	88739180	protein_coding	0.0253244	Fetus_liver; Liver; Fetus_Kidney
KHDRBS3	Livability	ENSBTAG00000002181	14	7440523	7582740	protein_coding	0.0384571	Testes; Fetus_Brain; Hippocampus
KHDRBS3	Livability	ENSBTAG00000002181	14	7440523	7582740	protein_coding	0.267166	Testes; Fetus_Brain; Hippocampus
NDRG1	Livability	ENSBTAG00000000711	14	9109762	9165926	protein_coding	0.0296375	Kidney; Kidney_Cortex; Kidney_Medulla
NPFFR2	Livability	ENSBTAG00000009070	6	89052210	89059348	protein_coding	0.0134086	Sperm; Brain_lobe; bladder
SLC4A4	Livability	ENSBTAG00000002348	6	88182303	88541046	protein_coding	0.0818632	Kidney; Fetus_Kidney; Sperm
ST3GAL1	Livability	ENSBTAG00000001156	14	8970645	8985785	protein_coding	0.0394509	Liver; Gall_Bladder; Infundibulum
TG	Livability	ENSBTAG00000007823	14	9262251	9508938	protein_coding	0.0722802	Thyroid; Infundibulum; Follicle
ZFAT	Livability	ENSBTAG00000017731	14	8166449	8304533	protein_coding	0.234654	White_blood_cells; Infundibulum; Fetus_Brain
ZFAT	Livability	ENSBTAG00000017731	14	8166449	8304533	protein_coding	0.0828562	White_blood_cells; Infundibulum; Fetus_Brain
ZNF613	Livability	ENSBTAG00000038487	18	58130465	58141877	protein_coding	0.0142678	Thyroid; Thymus; Skin
GC	MAST	ENSBTAG00000013718	6	88695940	88739180	protein_coding	0.150388	Fetus_liver; Liver; Fetus_Kidney
NPFFR2	MAST	ENSBTAG00000009070	6	89052210	89059348	protein_coding	0.016475	Sperm; Brain_lobe; bladder
ABCC9	Milk	ENSBTAG00000019294	5	88677586	88831324	protein_coding	1	Sperm; Fetus_muscle; Endometrium
ABCG2	Milk	ENSBTAG00000017704	6	37913110	38030583	protein_coding	0.990665	Endometrium; Vesicular_gland; Cervical_lining
ADAM15	Milk	ENSBTAG00000010663	3	15593459	15603312	protein_coding	0.0669713	Ureter; Rumen; Adipose
ASPHD1	Milk	ENSBTAG00000026319	25	26614815	26618147	protein_coding	0.0118551	Frontal_cortex; Hippocampus; Diencephalon
C20H5orf34	Milk	ENSBTAG00000007461	20	31324013	31350848	protein_coding	0.0693586	Sperm; Thymus; Infundibulum
CCL28	Milk	ENSBTAG00000001557	20	31391483	31409955	protein_coding	0.407251	Prostrate; Salivary_gland; Eye
CLN3	Milk	ENSBTAG00000018000	25	26301080	26313247	protein_coding	0.315341	Salivary_gland; bladder; Ascending_colon
CORO1A	Milk	ENSBTAG00000008631	25	26392492	26397916	protein_coding	0.0123566	CD8_cell; CD4_cell; White_blood_cells
DCST1	Milk	ENSBTAG00000010655	3	15603805	15619232	protein_coding	0.0308204	Testes; Sperm; Ileum
DCST2	Milk	ENSBTAG00000010638	3	15619491	15636992	protein_coding	0.0331257	Testes; Sperm; Rumen
DGAT1	Milk	ENSBTAG00000026356	14	1795351	1804562	protein_coding	1	Bone_marrow; Adipose; Jejunum
DNAJB13	Milk	ENSBTAG00000003682	15	54180361	54192907	protein_coding	0.0291864	Infundibulum; Testes; Ampulla
DOC2A	Milk	ENSBTAG00000005031	25	26513088	26518561	protein_coding	0.0411356	Frontal_cortex; Cerebral_cortex; Brain_lobe
EFNA4	Milk	ENSBTAG00000010673	3	15587570	15591685	protein_coding	0.0325954	Reticulum; Abomasum; Skin
FDPS	Milk	ENSBTAG00000003948	3	15356047	15374937	protein_coding	0.0178001	Diaphragm; Gall_Bladder; Corpus_Luteum
GBA	Milk	ENSBTAG00000014841	3	15445102	15463930	protein_coding	0.743281	SME; Tail_epididymis; Diaphragm
GC	Milk	ENSBTAG00000013718	6	88695940	88739180	protein_coding	0.29731	Fetus_liver; Liver; Fetus_Kidney
INO80E	Milk	ENSBTAG00000005030	25	26518232	26526783	protein_coding	0.014259	Testes; Pineal_gland; Hippocampus
KCTD13	Milk	ENSBTAG00000015982	25	26601438	26614677	protein_coding	0.0105793	Hippocampus; Frontal_cortex; Fetus_Brain
MAPK3	Milk	ENSBTAG00000016156	25	26437044	26444129	protein_coding	0.0362298	Pons; Midbrain; Frontal_cortex
MGST1	Milk	ENSBTAG00000008541	5	93926791	93950162	protein_coding	1	Thyroid; Vesicular_gland; Bone_marrow
MKL1	Milk	ENSBTAG00000002630	5	112261806	112372282	protein_coding	1	White_blood_cells; CD4_cell; Lymphocyte
MRGPRF	Milk	ENSBTAG00000015185	29	47009944	47019518	protein_coding	0.0189159	Uterine_myometrium; Vas_deferens; Isthmus
MRPL48	Milk	ENSBTAG00000008347	15	54065466	54120351	protein_coding	0.0206694	Pons; Prostrate; Rumen_ephthelial_cell
NNT	Milk	ENSBTAG00000011885	20	31171388	31258005	protein_coding	0.256732	Ventricle; Kidney; Chorid_plexus
NUPR1	Milk	ENSBTAG00000018016	25	26340079	26341408	protein_coding	0.0191521	Nasal_mucosa; Salivary_gland; Prostrate
PAAF1	Milk	ENSBTAG00000003679	15	54131056	54171357	protein_coding	0.015579	Pons; Testes; SME
PPP4C	Milk	ENSBTAG00000012928	25	26460142	26468245	protein_coding	0.0191599	CD8_cell; CD4_cell; Ileum
RAB6A	Milk	ENSBTAG00000000025	15	53936927	54027857	protein_coding	0.789543	Brain_lobe; Cerebellum; Fetus_Brain
SEZ6L2	Milk	ENSBTAG00000007955	25	26620088	26640306	protein_coding	0.0118551	Hippocampus; Pineal_gland; SME
SGF29	Milk	ENSBTAG00000016883	25	26361862	26381153	protein_coding	0.146543	Testes; Trachea; Isthmus
SLC37A1	Milk	ENSBTAG00000021286	1	144364346	144437225	protein_coding	0.797348	Ascending_colon; Descending_Colon; Colon
TAOK2	Milk	ENSBTAG00000017422	25	26531018	26547977	protein_coding	0.163502	Diencephalon; Pineal_gland; Fetus_Brain
TBX6	Milk	ENSBTAG00000009046	25	26455575	26459590	protein_coding	0.113817	Testes; Pons; SME
TMEM219	Milk	ENSBTAG00000021785	25	26549204	26565653	protein_coding	0.0255674	Pons; Jejunum; Isthmus
YPEL3	Milk	ENSBTAG00000009047	25	26451072	26454431	protein_coding	0.014212	Frontal_cortex; Cerebral_cortex; Vesicular_gland
ZBTB7B	Milk	ENSBTAG00000021512	3	15634915	15648928	protein_coding	0.0365823	Rumen; RumenPapillae; Reticulum
ABCG2	Net_Merit	ENSBTAG00000017704	6	37913110	38030583	protein_coding	0.897329	Endometrium; Vesicular_gland; Cervical_lining
ARRDC3	Net_Merit	ENSBTAG00000007116	7	93240419	93253094	protein_coding	0.359174	Uterine_myometrium; Spleen; White_blood_cells
COMMD5	Net_Merit	ENSBTAG00000018455	14	1531491	1533526	protein_coding	0.0432955	Pons; Isthmus; Adipose
DGAT1	Net_Merit	ENSBTAG00000026356	14	1795351	1804562	protein_coding	0.999996	Bone_marrow; Adipose; Jejunum
PPP1R16A	Net_Merit	ENSBTAG00000007834	14	1628814	1633988	protein_coding	0.0208463	Infundibulum; Pineal_gland; Ileum
TONSL	Net_Merit	ENSBTAG00000007749	14	1681494	1692498	protein_coding	0.0167497	CD4_cell; CD8_cell; Ileum
ZNF16	Net_Merit	ENSBTAG00000016203	14	1445334	1456750	protein_coding	0.0142093	Fetus_Brain; Hypothalamus; Diencephalon
ZNF613	Net_Merit	ENSBTAG00000038487	18	58130465	58141877	protein_coding	0.607898	Thyroid; Thymus; Skin
ABCG2	Pro_Percent	ENSBTAG00000017704	6	37913110	38030583	protein_coding	0.999942	Endometrium; Vesicular_gland; Cervical_lining
ABO	Pro_Percent	ENSBTAG00000012525	11	104232297	104251043	protein_coding	0.988378	Ascending_colon; Ileum; Mammary
ADAM15	Pro_Percent	ENSBTAG00000010663	3	15593459	15603312	protein_coding	0.0177241	Ureter; Rumen; Adipose
ARHGEF17	Pro_Percent	ENSBTAG00000012505	15	53582241	53643983	protein_coding	0.011033	Trachea; Vas_deferens; Aorta
ARRDC4	Pro_Percent	ENSBTAG00000018252	21	8924763	8939028	protein_coding	0.148575	Milk_cells; Rumen; Mammary
BUD13	Pro_Percent	ENSBTAG00000016855	15	27834018	27858657	protein_coding	0.0155196	Sperm; White_blood_cells; Fetus_testes
CEP164	Pro_Percent	ENSBTAG00000014137	15	28431028	28501993	protein_coding	0.0892386	Testes; Infundibulum; Pineal_gland
COMMD5	Pro_Percent	ENSBTAG00000018455	14	1531491	1533526	protein_coding	0.328065	Pons; Isthmus; Adipose
CSF2RB	Pro_Percent	ENSBTAG00000009064	5	75724620	75745819	protein_coding	0.0396779	Mammary; Prostrate; Milk_cells
CSN1S1	Pro_Percent	ENSBTAG00000007695	6	87141556	87159096	protein_coding	0.999468	Mammary; Milk_cells; Lymph_nodes
CSN2	Pro_Percent	ENSBTAG00000002632	6	87179502	87188025	protein_coding	0.216702	Milk_cells; Mammary; Lymph_nodes
CSN3	Pro_Percent	ENSBTAG00000039787	6	87378398	87392750	protein_coding	0.195787	Milk_cells; Mammary; Lymph_nodes
DAPK2	Pro_Percent	ENSBTAG00000011820	10	46006654	46130505	protein_coding	0.0178877	White_blood_cells; Lymphocyte; Chorid_plexus
DCST2	Pro_Percent	ENSBTAG00000010638	3	15619491	15636992	protein_coding	0.0730254	Testes; Sperm; Rumen
DGAT1	Pro_Percent	ENSBTAG00000026356	14	1795351	1804562	protein_coding	1	Bone_marrow; Adipose; Jejunum
DNAJB13	Pro_Percent	ENSBTAG00000003682	15	54180361	54192907	protein_coding	0.0509673	Infundibulum; Testes; Ampulla
DSCAML1	Pro_Percent	ENSBTAG00000016692	15	28524421	28623243	protein_coding	0.0415839	Diencephalon; Fetus_Brain; Hippocampus
EFNA4	Pro_Percent	ENSBTAG00000010673	3	15587570	15591685	protein_coding	0.037556	Reticulum; Abomasum; Skin
FBXL22	Pro_Percent	ENSBTAG00000008807	10	46461587	46466076	protein_coding	0.0310523	Uterine_myometrium; Vas_deferens; Trachea
GBF1	Pro_Percent	ENSBTAG00000006014	26	22761606	22884208	protein_coding	0.142365	SME; Testes; Salivary_gland
HERC1	Pro_Percent	ENSBTAG00000019474	10	46241889	46455782	protein_coding	0.0144934	Fetus_Brain; White_blood_cells; Fetus_liver
HSTN	Pro_Percent	ENSBTAG00000048250	6	87189736	87204439	protein_coding	0.384414	Milk_cells; Mammary; Sperm
LALBA	Pro_Percent	ENSBTAG00000005859	5	31347861	31349882	protein_coding	0.499836	Mammary; Milk_cells; Jejunum
MAT1A	Pro_Percent	ENSBTAG00000005963	28	35870568	35887533	protein_coding	0.0136824	Liver; Fetus_liver; Epididymis
MGST1	Pro_Percent	ENSBTAG00000008541	5	93926791	93950162	protein_coding	0.998631	Thyroid; Vesicular_gland; Bone_marrow
MRPL48	Pro_Percent	ENSBTAG00000008347	15	54065466	54120351	protein_coding	0.0616528	Pons; Prostrate; Rumen_ephthelial_cell
NCF4	Pro_Percent	ENSBTAG00000007531	5	75641217	75659769	protein_coding	0.551438	CD8_cell; White_blood_cells; Spleen
NFAT5	Pro_Percent	ENSBTAG00000013412	18	36847730	36898690	protein_coding	0.625193	Sperm; Thymus; White_blood_cells
NQO1	Pro_Percent	ENSBTAG00000020632	18	36911358	36924689	protein_coding	0.180164	Urethra; Thyroid; Abomasum
NXF1	Pro_Percent	ENSBTAG00000009488	29	41796853	41808165	protein_coding	0.440316	CD8_cell; CD4_cell; Pineal_gland
ODAM	Pro_Percent	ENSBTAG00000006810	6	87327028	87335880	protein_coding	0.221559	Sperm; Salivary_gland; Milk_cells
ODAM	Pro_Percent	ENSBTAG00000006810	6	87327028	87335880	protein_coding	0.0163757	Sperm; Salivary_gland; Milk_cells
PAAF1	Pro_Percent	ENSBTAG00000003679	15	54131056	54171357	protein_coding	0.0336702	Pons; Testes; SME
PCSK7	Pro_Percent	ENSBTAG00000003052	15	28323768	28351207	protein_coding	0.014698	Ascending_colon; Caecum; Colon
PPP1R16A	Pro_Percent	ENSBTAG00000007834	14	1628814	1633988	protein_coding	0.165004	Infundibulum; Pineal_gland; Ileum
RAB6A	Pro_Percent	ENSBTAG00000000025	15	53936927	54027857	protein_coding	0.722348	Brain_lobe; Cerebellum; Fetus_Brain
RNF19A	Pro_Percent	ENSBTAG00000017833	14	66242247	66298706	protein_coding	0.612614	Thymus; Lymph_nodes; Ovary
RNF214	Pro_Percent	ENSBTAG00000019358	15	28355288	28397142	protein_coding	0.152799	Fetus_Brain; SME; Testes
SFTPD	Pro_Percent	ENSBTAG00000046421	28	35813760	35824383	protein_coding	0.985358	Lung; Pons; Nasal_mucosa
SIK3	Pro_Percent	ENSBTAG00000015119	15	27942431	28060833	protein_coding	0.0203271	Midbrain; Testes; Frontal_cortex
SLC37A1	Pro_Percent	ENSBTAG00000021286	1	144364346	144437225	protein_coding	0.204694	Ascending_colon; Descending_Colon; Colon
SLC50A1	Pro_Percent	ENSBTAG00000003083	3	15518286	15520448	protein_coding	0.999939	Epididymis; Salivary_gland; Prostrate
SULT1E1	Pro_Percent	ENSBTAG00000011952	6	87035926	87094952	protein_coding	0.018426	Fetus_liver; Adrenal; Sperm
TAF6L	Pro_Percent	ENSBTAG00000009484	29	41785795	41793146	protein_coding	0.440316	Ileum; SME; Frontal_cortex
TBC1D22A	Pro_Percent	ENSBTAG00000012291	5	118086468	118343833	protein_coding	0.946546	Ileum; Rumen; Bulbourethral_gland
THBS3	Pro_Percent	ENSBTAG00000000057	3	15470302	15480443	protein_coding	0.249064	Fetus_muscle; Tail_epididymis; Infundibulum
TMEM223	Pro_Percent	ENSBTAG00000009487	29	41795548	41796692	protein_coding	0.0217705	Rumen_ephthelial_cell; Isthmus; Pons
TONSL	Pro_Percent	ENSBTAG00000007749	14	1681494	1692498	protein_coding	0.183123	CD4_cell; CD8_cell; Ileum
TRIM46	Pro_Percent	ENSBTAG00000010622	3	15488474	15498217	protein_coding	0.58827	Hippocampus; Frontal_cortex; Diencephalon
TTC9C	Pro_Percent	ENSBTAG00000000773	29	41741321	41750148	protein_coding	0.0779798	Sperm; Thymus; Lymph_nodes
USP3	Pro_Percent	ENSBTAG00000008805	10	46471349	46570989	protein_coding	0.694432	White_blood_cells; Lymphocyte; CD4_cell
WWP2	Pro_Percent	ENSBTAG00000018421	18	36955238	37096910	protein_coding	0.110397	Larynx_cartilage; Trachea; Aorta
ZBTB3	Pro_Percent	ENSBTAG00000021329	29	41754017	41755558	protein_coding	0.0117574	Testes; Endometrium; Mammary
ZBTB7B	Pro_Percent	ENSBTAG00000021512	3	15634915	15648928	protein_coding	0.0159831	Rumen; RumenPapillae; Reticulum
ZNF16	Pro_Percent	ENSBTAG00000016203	14	1445334	1456750	protein_coding	0.223281	Fetus_Brain; Hypothalamus; Diencephalon
ARRDC3	Prod_Life	ENSBTAG00000007116	7	93240419	93253094	protein_coding	0.13479	Uterine_myometrium; Spleen; White_blood_cells
CCDC88C	Prod_Life	ENSBTAG00000000838	21	56629747	56773304	protein_coding	0.262569	CD8_cell; CD4_cell; White_blood_cells
GC	Prod_Life	ENSBTAG00000013718	6	88695940	88739180	protein_coding	0.0385784	Fetus_liver; Liver; Fetus_Kidney
PPP4R3A	Prod_Life	ENSBTAG00000005040	21	56800878	56835145	protein_coding	0.482497	CD4_cell; CD8_cell; White_blood_cells
SLC4A4	Prod_Life	ENSBTAG00000002348	6	88182303	88541046	protein_coding	0.0101374	Kidney; Fetus_Kidney; Sperm
TIGAR	Prod_Life	ENSBTAG00000016650	5	106223071	106238040	protein_coding	0.999308	Rumen_ephthelial_cell; Brain_lobe; Brain
ZFAT	Prod_Life	ENSBTAG00000017731	14	8166449	8304533	protein_coding	0.0118162	White_blood_cells; Infundibulum; Fetus_Brain
ZNF613	Prod_Life	ENSBTAG00000038487	18	58130465	58141877	protein_coding	0.28547	Thyroid; Thymus; Skin
ABCC9	Protein	ENSBTAG00000019294	5	88677586	88831324	protein_coding	1	Sperm; Fetus_muscle; Endometrium
ABCG2	Protein	ENSBTAG00000017704	6	37913110	38030583	protein_coding	0.855984	Endometrium; Vesicular_gland; Cervical_lining
CSN1S1	Protein	ENSBTAG00000007695	6	87141556	87159096	protein_coding	0.999568	Mammary; Milk_cells; Lymph_nodes
DGAT1	Protein	ENSBTAG00000026356	14	1795351	1804562	protein_coding	0.999781	Bone_marrow; Adipose; Jejunum
FAM71E1	Protein	ENSBTAG00000020082	18	57066061	57071540	protein_coding	0.0103528	Testes; Sperm; Pons
GLT6D1	Protein	ENSBTAG00000020249	11	103317236	103325372	protein_coding	0.0354067	Testes; Fetus_testes; Epididymis
GON4L	Protein	ENSBTAG00000020356	3	15009727	15093527	protein_coding	0.997938	Testes; White_blood_cells; CD4_cell
MKL1	Protein	ENSBTAG00000002630	5	112261806	112372282	protein_coding	0.999611	White_blood_cells; CD4_cell; Lymphocyte
PAEP	Protein	ENSBTAG00000014678	11	103301664	103306381	protein_coding	0.841874	Milk_cells; Mammary; Jejunum
POLD1	Protein	ENSBTAG00000011083	18	57014868	57028488	protein_coding	0.989221	Ileum; Fetus_liver; CD8_cell
ZNF16	Protein	ENSBTAG00000016203	14	1445334	1456750	protein_coding	0.0162098	Fetus_Brain; Hypothalamus; Diencephalon
FAM234A	Rear_teat_pla	ENSBTAG00000016571	25	282554	290839	protein_coding	0.0103597	Isthmus; Rumen; Kidney
FANCC	Rear_teat_pla	ENSBTAG00000017195	8	83023629	83270596	protein_coding	0.276224	Sperm; Thyroid; Endometrium
HMCN1	Rear_teat_pla	ENSBTAG00000015235	16	68192901	68733392	protein_coding	0.586869	Sperm; Fetus_Kidney; Fetus_testes
LUC7L	Rear_teat_pla	ENSBTAG00000016568	25	225533	257902	protein_coding	0.0759974	Isthmus; Pons; Pineal_gland
MPG	Rear_teat_pla	ENSBTAG00000026422	25	139711	146961	protein_coding	0.0836525	Infundibulum; Kidney; Rumen_ephthelial_cell
MROH9	Rear_teat_pla	ENSBTAG00000006408	16	39342584	39421208	protein_coding	0.908174	Sperm; Testes; Kidney_Medulla
RAB11FIP2	Rear_teat_pla	ENSBTAG00000007460	26	38617113	38657253	protein_coding	0.644144	Thyroid; Thymus; Brain_lobe
RAB11FIP3	Rear_teat_pla	ENSBTAG00000016591	25	404964	464143	protein_coding	0.175623	Kidney_Cortex; Kidney; Frontal_cortex
RHBDF1	Rear_teat_pla	ENSBTAG00000019805	25	115788	134128	protein_coding	0.367622	Adipose; Ureter; Fornix_vagina
TMTC2	Rear_teat_pla	ENSBTAG00000002888	5	12460330	12563124	protein_coding	0.999822	Sperm; Uterine_myometrium; Fetus_muscle
ARRDC3	Rear_ud_height	ENSBTAG00000007116	7	93240419	93253094	protein_coding	0.813981	Uterine_myometrium; Spleen; White_blood_cells
CCDC88C	Rear_ud_height	ENSBTAG00000000838	21	56629747	56773304	protein_coding	0.893082	CD8_cell; CD4_cell; White_blood_cells
FBLN5	Rear_ud_height	ENSBTAG00000018123	21	57153110	57246389	protein_coding	0.0171903	Trachea; Aorta; Tail_epididymis
PPP4R3A	Rear_ud_height	ENSBTAG00000005040	21	56800878	56835145	protein_coding	0.029257	CD4_cell; CD8_cell; White_blood_cells
TMTC2	Rear_ud_height	ENSBTAG00000002888	5	12460330	12563124	protein_coding	0.999925	Sperm; Uterine_myometrium; Fetus_muscle
ABCB4	RETP	ENSBTAG00000005653	4	33120503	33193999	protein_coding	0.0143087	Liver; Sperm; Fetus_liver
CCDC126	RETP	ENSBTAG00000013010	4	32356965	32399552	protein_coding	0.0102101	Sperm; Kidney_Medulla; Fetus_Kidney
CROT	RETP	ENSBTAG00000021535	4	33197554	33259125	protein_coding	0.619821	Liver; Salivary_gland; Endometrium
DBF4	RETP	ENSBTAG00000014711	4	32427570	32454703	protein_coding	0.0996681	Sperm; Testes; CD4_cell
IGF2BP3	RETP	ENSBTAG00000019406	4	32077891	32222388	protein_coding	0.0332094	Fetus_Kidney; Fetus_liver; Fetus_muscle
KIAA1324L	RETP	ENSBTAG00000004023	4	33518953	33763007	protein_coding	0.328933	Thymus; Midbrain; Sperm
KLHL7	RETP	ENSBTAG00000016010	4	31900915	31956645	protein_coding	0.0100186	Brain_lobe; Fetus_Brain; Cerebellum
MALSU1	RETP	ENSBTAG00000019403	4	32057862	32077033	protein_coding	0.976429	Fetus_Kidney; Kidney_Cortex; Kidney
QDPR	RETP	ENSBTAG00000040333	6	117727460	117746408	protein_coding	0.0130123	Epididymis; Kidney; Pons
RUNDC3B	RETP	ENSBTAG00000021313	4	32691262	32858257	protein_coding	0.0991739	Brain_lobe; Fetus_Brain; Cerebellum
SLC25A40	RETP	ENSBTAG00000033449	4	32858616	32873479	protein_coding	0.124299	Fetus_Brain; Vesicular_gland; Fetus_testes
TMEM182	RETP	ENSBTAG00000038462	11	7449519	7492859	protein_coding	0.957406	Atrium; Ventricle; Heart
ZNF583	RETP	ENSBTAG00000000801	18	63903404	63910967	protein_coding	0.0100537	Medulla_oblongata; Hypothalamus; Thalamus
C1H3orf70	Rump_angle	ENSBTAG00000005212	1	82573990	82694776	protein_coding	0.109158	Fetus_Brain; Medulla_oblongata; Uterine_myometrium
CFD	Rump_angle	ENSBTAG00000048122	7	45030310	45032845	protein_coding	0.0158198	Spleen; Lung; CD8_cell
COLEC12	Rump_angle	ENSBTAG00000007705	24	35630929	35816269	protein_coding	0.997111	Ovary; SME; Endometrium
EHHADH	Rump_angle	ENSBTAG00000019625	1	82467817	82521151	protein_coding	0.859533	Kidney_Medulla; Kidney_Cortex; Kidney
MBD3	Rump_angle	ENSBTAG00000038409	7	45577377	45579729	protein_coding	0.109538	Testes; Larynx_cartilage; Diencephalon
MPP7	Rump_angle	ENSBTAG00000017354	13	36610252	36833259	protein_coding	0.161417	Rumen; Skin; Sperm
SLC24A2	Rump_angle	ENSBTAG00000043972	8	24497953	24778056	protein_coding	0.973431	Brain_lobe; Brain; Sperm
TCF3	Rump_angle	ENSBTAG00000008695	7	45599593	45630734	protein_coding	0.085057	Ileum; Thymus; Lymphocyte
ZNF613	Rump_angle	ENSBTAG00000038487	18	58130465	58141877	protein_coding	0.0380777	Thyroid; Thymus; Skin
ANKFN1	Rump_width	ENSBTAG00000021292	19	7329920	7490693	protein_coding	0.981903	Sperm; Infundibulum; Ampulla
CCND2	Rump_width	ENSBTAG00000016649	5	106253907	106276819	protein_coding	0.964896	Rumen_ephthelial_cell; White_blood_cells; Colon
FANCC	Rump_width	ENSBTAG00000017195	8	83023629	83270596	protein_coding	0.180719	Sperm; Thyroid; Endometrium
FGF23	Rump_width	ENSBTAG00000030343	5	106208179	106216757	protein_coding	0.139789	Sperm; Thymus; Ovary
FGF6	Rump_width	ENSBTAG00000006800	5	106157909	106169922	protein_coding	0.75616	Fetus_muscle; Sperm; Muscle
HABP4	Rump_width	ENSBTAG00000011586	8	84579583	84615685	protein_coding	0.336091	Fetus_Kidney; Kidney_Cortex; Kidney
IARS	Rump_width	ENSBTAG00000000974	8	85268890	85350117	protein_coding	0.0517493	Rumen_ephthelial_cell; Sperm; Fetus_Kidney
IPCEF1	Rump_width	ENSBTAG00000003489	9	92246499	92318064	protein_coding	0.588834	Sperm; CD8_cell; CD4_cell
LSP1	Rump_width	ENSBTAG00000010447	29	50238211	50276209	protein_coding	0.167151	CD8_cell; CD4_cell; Lymphocyte
SLC35D2	Rump_width	ENSBTAG00000019939	8	84451887	84508206	protein_coding	0.0129602	Fetus_Kidney; Kidney_Cortex; Ileum
SNAP25	Rump_width	ENSBTAG00000008323	13	3369182	3452555	protein_coding	0.34741	Cerebellum; Cerebral_cortex; Brain_lobe
SYT8	Rump_width	ENSBTAG00000040103	29	50289094	50293879	protein_coding	0.309418	Larynx_cartilage; Lymphocyte; Mammary
TNNI2	Rump_width	ENSBTAG00000010880	29	50285049	50287648	protein_coding	0.309995	Muscle; Larynx_cartilage; Chorid_plexus
ZNF367	Rump_width	ENSBTAG00000006587	8	84514066	84537863	protein_coding	0.355416	White_blood_cells; Ileum; Testes
ZNF484	Rump_width	ENSBTAG00000031682	8	85224607	85232666	protein_coding	0.0320816	Cerebellum; Uterine_myometrium; Fetus_Brain
ANKFN1	SCS	ENSBTAG00000021292	19	7329920	7490693	protein_coding	0.868534	Sperm; Infundibulum; Ampulla
C6	SCS	ENSBTAG00000014177	20	33328558	33405555	protein_coding	0.997185	Liver; Duodenum; Jejunum
DGAT1	SCS	ENSBTAG00000026356	14	1795351	1804562	protein_coding	0.990075	Bone_marrow; Adipose; Jejunum
ERBB2	SCS	ENSBTAG00000021798	19	40722051	40745987	protein_coding	0.060514	Infundibulum; Ampulla; Salivary_gland
FBXO43	SCS	ENSBTAG00000019795	14	66422896	66434635	protein_coding	0.0312955	Testes; Sperm; Thymus
LDLR	SCS	ENSBTAG00000012314	7	16768644	16802349	protein_coding	0.965054	Gall_Bladder; Diaphragm; Corpus_Luteum
MED1	SCS	ENSBTAG00000013236	19	40495454	40516179	protein_coding	0.0284034	White_blood_cells; Thymus; Uterine_myometrium
PABPC1	SCS	ENSBTAG00000046358	14	65816006	65833756	protein_coding	0.010192	White_blood_cells; Salivary_gland; Mammary
PGAP3	SCS	ENSBTAG00000011732	19	40696351	40710279	protein_coding	0.164423	Follicle; Infundibulum; Thyroid
PNMT	SCS	ENSBTAG00000011731	19	40694079	40695765	protein_coding	0.105038	Adrenal; Heart; Atrium
PPP1R1B	SCS	ENSBTAG00000006035	19	40655222	40663767	protein_coding	0.0327212	Prostrate; Diencephalon; Vesicular_gland
SPAG1	SCS	ENSBTAG00000032544	14	66320226	66406176	protein_coding	0.22214	Testes; Infundibulum; Ampulla
STARD3	SCS	ENSBTAG00000011729	19	40664260	40688903	protein_coding	0.458704	CD8_cell; Salivary_gland; Ileum
TCAP	SCS	ENSBTAG00000011730	19	40691138	40692346	protein_coding	0.0327212	Larynx_cartilage; Heart; Chorid_plexus
TMPRSS13	SCS	ENSBTAG00000008342	15	29000630	29022098	protein_coding	0.0172774	RumenPapillae; Esophagus; Rumen
ADGRV1	Sire_Calv_Ease	ENSBTAG00000006031	7	92510676	92699410	protein_coding	0.999971	Sperm; Fetus_Brain; Uterine_myometrium
AKAP3	Sire_Calv_Ease	ENSBTAG00000001020	5	105896016	105941353	protein_coding	0.0493502	Testes; Epididymis; Sperm
ARRDC3	Sire_Calv_Ease	ENSBTAG00000007116	7	93240419	93253094	protein_coding	0.89739	Uterine_myometrium; Spleen; White_blood_cells
CHEK2	Sire_Calv_Ease	ENSBTAG00000004956	17	70269592	70305247	protein_coding	0.673358	Endometrium; Fetus_Kidney; Ileum
DYRK4	Sire_Calv_Ease	ENSBTAG00000007556	5	105946100	105985653	protein_coding	0.123931	Sperm; Infundibulum; Testes
FGF23	Sire_Calv_Ease	ENSBTAG00000030343	5	106208179	106216757	protein_coding	0.0130061	Sperm; Thymus; Ovary
FGF6	Sire_Calv_Ease	ENSBTAG00000006800	5	106157909	106169922	protein_coding	0.071987	Fetus_muscle; Sperm; Muscle
GALNT8	Sire_Calv_Ease	ENSBTAG00000017378	5	105799704	105837839	protein_coding	0.565323	Esophagus; Skin; Sperm
MN1	Sire_Calv_Ease	ENSBTAG00000010464	17	69431677	69478074	protein_coding	0.0748882	Fetus_Brain; Chorid_plexus; Muscle
MRGPRG	Sire_Calv_Ease	ENSBTAG00000031271	29	49026020	49026889	protein_coding	0.987347	Lymph_nodes; Adrenal; Lung
MTMR3	Sire_Calv_Ease	ENSBTAG00000001030	17	71122533	71253675	protein_coding	0.0212244	Thymus; SME; Bone_marrow
NDUFA9	Sire_Calv_Ease	ENSBTAG00000005465	5	105870530	105892347	protein_coding	0.0883244	Larynx_cartilage; Chorid_plexus; Heart
NF2	Sire_Calv_Ease	ENSBTAG00000013153	17	70895108	70966968	protein_coding	0.0150525	Testes; Fetus_Brain; Bulbourethral_gland
PITPNB	Sire_Calv_Ease	ENSBTAG00000017799	17	69527044	69588470	protein_coding	0.0491385	Thymus; Lymph_nodes; Tail_epididymis
TIGAR	Sire_Calv_Ease	ENSBTAG00000016650	5	106223071	106238040	protein_coding	0.0435069	Rumen_ephthelial_cell; Brain_lobe; Brain
TTC28	Sire_Calv_Ease	ENSBTAG00000012193	17	69656038	69933993	protein_coding	0.0982367	Fetus_Brain; Uterine_myometrium; Ampulla
ZNF613	Sire_Still_Birth	ENSBTAG00000038487	18	58130465	58141877	protein_coding	0.691406	Thyroid; Thymus; Skin
ARPC2	Stature	ENSBTAG00000010386	2	106978526	107006143	protein_coding	0.0104653	Rumen_ephthelial_cell; CD4_cell; CD8_cell
CCND2	Stature	ENSBTAG00000016649	5	106253907	106276819	protein_coding	0.998206	Rumen_ephthelial_cell; White_blood_cells; Colon
CRYBA2	Stature	ENSBTAG00000014819	2	107655326	107658571	protein_coding	0.0148276	Eye; Larynx_cartilage; Bulbourethral_gland
CYP27A1	Stature	ENSBTAG00000013489	2	107462687	107504968	protein_coding	0.0881087	Endometrium; Isthmus; Liver
FAM98B	Stature	ENSBTAG00000021870	10	34162005	34194793	protein_coding	0.930221	Fetus_Kidney; Descending_Colon; Pineal_gland
FGF6	Stature	ENSBTAG00000006800	5	106157909	106169922	protein_coding	0.999971	Fetus_muscle; Sperm; Muscle
FSTL1	Stature	ENSBTAG00000022155	1	65742633	65802423	protein_coding	0.984829	Fetus_muscle; Adipose; Rumen_ephthelial_cell
GLB1L	Stature	ENSBTAG00000020611	2	107908452	107915086	protein_coding	0.0109502	Testes; Fetus_testes; Cervical_lining
GPR156	Stature	ENSBTAG00000001464	1	65541498	65620536	protein_coding	0.010074	Sperm; Fetus_Brain; Rumen_ephthelial_cell
H3F3C	Stature	ENSBTAG00000017016	14	21033277	21034329	protein_coding	0.0278835	Testes; Thymus; Sperm
H3F3C	Stature	ENSBTAG00000011508	16	31417942	31421544	protein_coding	0.0278835	Testes; Sperm; Epididymis
IHH	Stature	ENSBTAG00000008452	2	107722668	107728939	protein_coding	0.0204531	Colon; Ascending_colon; Isthmus
LSP1	Stature	ENSBTAG00000010447	29	50238211	50276209	protein_coding	0.0236658	CD8_cell; CD4_cell; Lymphocyte
LSP1	Stature	ENSBTAG00000010447	29	50238211	50276209	protein_coding	0.0151559	CD8_cell; CD4_cell; Lymphocyte
MRGPRG	Stature	ENSBTAG00000031271	29	49026020	49026889	protein_coding	0.0114285	Lymph_nodes; Adrenal; Lung
NADSYN1	Stature	ENSBTAG00000016470	29	48955480	48983276	protein_coding	0.98846	Ileum; Pineal_gland; bladder
PLEKHA6	Stature	ENSBTAG00000004641	16	1806692	1878608	protein_coding	0.0377769	Midbrain; Medulla_oblongata; Thalamus
PRKDC	Stature	ENSBTAG00000017019	14	21038513	21164037	protein_coding	0.346685	CD4_cell; CD8_cell; White_blood_cells
SPRED1	Stature	ENSBTAG00000032518	10	33950024	34069008	protein_coding	0.023221	Brain_lobe; Cerebellum; Fetus_muscle
STK36	Stature	ENSBTAG00000003819	2	107356024	107382298	protein_coding	0.103776	Testes; Infundibulum; Pineal_gland
SYT8	Stature	ENSBTAG00000040103	29	50289094	50293879	protein_coding	0.0144287	Larynx_cartilage; Lymphocyte; Mammary
SYT8	Stature	ENSBTAG00000040103	29	50289094	50293879	protein_coding	0.20788	Larynx_cartilage; Lymphocyte; Mammary
TCP11	Stature	ENSBTAG00000016891	23	9020184	9052477	protein_coding	0.999738	Testes; Sperm; Epididymis
TICAM1	Stature	ENSBTAG00000019966	7	20547964	20550264	protein_coding	0.0299128	Rumen; RumenPapillae; Bone_marrow
TNNI2	Stature	ENSBTAG00000010880	29	50285049	50287648	protein_coding	0.775048	Muscle; Larynx_cartilage; Chorid_plexus
TNNI2	Stature	ENSBTAG00000010880	29	50285049	50287648	protein_coding	0.170303	Muscle; Larynx_cartilage; Chorid_plexus
TTLL4	Stature	ENSBTAG00000018415	2	107412038	107428757	protein_coding	0.259366	Testes; Thalamus; Medulla_oblongata
UBE2V2	Stature	ENSBTAG00000023218	14	21225303	21245522	protein_coding	0.0259354	Brain_lobe; Rumen_ephthelial_cell; Cerebral_cortex
USP37	Stature	ENSBTAG00000016572	2	107174362	107245866	protein_coding	0.0143535	Sperm; Lymphocyte; Fetus_Brain
ZNF613	Stature	ENSBTAG00000038487	18	58130465	58141877	protein_coding	0.607576	Thyroid; Thymus; Skin
ARRDC3	Strength	ENSBTAG00000007116	7	93240419	93253094	protein_coding	0.662132	Uterine_myometrium; Spleen; White_blood_cells
CCND2	Strength	ENSBTAG00000016649	5	106253907	106276819	protein_coding	0.70973	Rumen_ephthelial_cell; White_blood_cells; Colon
DAPK1	Strength	ENSBTAG00000000738	8	82207240	82309507	protein_coding	0.384496	SME; Fetus_Brain; White_blood_cells
FANCC	Strength	ENSBTAG00000017195	8	83023629	83270596	protein_coding	0.0266663	Sperm; Thyroid; Endometrium
FBP2	Strength	ENSBTAG00000019554	8	82396095	82438817	protein_coding	0.0188276	Muscle; Chorid_plexus; Kidney_Cortex
FGF23	Strength	ENSBTAG00000030343	5	106208179	106216757	protein_coding	0.0254315	Sperm; Thymus; Ovary
FGF6	Strength	ENSBTAG00000006800	5	106157909	106169922	protein_coding	0.819813	Fetus_muscle; Sperm; Muscle
GC	Strength	ENSBTAG00000013718	6	88695940	88739180	protein_coding	0.0382776	Fetus_liver; Liver; Fetus_Kidney
HABP4	Strength	ENSBTAG00000011586	8	84579583	84615685	protein_coding	0.0360676	Fetus_Kidney; Kidney_Cortex; Kidney
IARS	Strength	ENSBTAG00000000974	8	85268890	85350117	protein_coding	0.0525158	Rumen_ephthelial_cell; Sperm; Fetus_Kidney
NPFFR2	Strength	ENSBTAG00000009070	6	89052210	89059348	protein_coding	0.0746686	Sperm; Brain_lobe; bladder
SLC35D2	Strength	ENSBTAG00000019939	8	84451887	84508206	protein_coding	0.0196523	Fetus_Kidney; Kidney_Cortex; Ileum
TIGAR	Strength	ENSBTAG00000016650	5	106223071	106238040	protein_coding	0.289395	Rumen_ephthelial_cell; Brain_lobe; Brain
ZNF367	Strength	ENSBTAG00000006587	8	84514066	84537863	protein_coding	0.0382066	White_blood_cells; Ileum; Testes
ZNF484	Strength	ENSBTAG00000031682	8	85224607	85232666	protein_coding	0.0261094	Cerebellum; Uterine_myometrium; Fetus_Brain
ZNF613	Strength	ENSBTAG00000038487	18	58130465	58141877	protein_coding	0.660327	Thyroid; Thymus; Skin
ADAM12	Teat_length	ENSBTAG00000012444	26	45848827	46238138	protein_coding	0.0900673	Uterus; Endometrium; Corpus_Luteum
ARRDC3	Teat_length	ENSBTAG00000007116	7	93240419	93253094	protein_coding	0.734745	Uterine_myometrium; Spleen; White_blood_cells
CHST11	Teat_length	ENSBTAG00000010644	5	68385645	68645774	protein_coding	0.483193	Milk_cells; CD8_cell; White_blood_cells
CTU1	Teat_length	ENSBTAG00000039212	18	57517497	57524958	protein_coding	0.0100472	Ileum; Frontal_cortex; Mammary
CYP26B1	Teat_length	ENSBTAG00000012212	11	12371180	12387041	protein_coding	0.037055	Fetus_Brain; Pineal_gland; Thymus
DHCR7	Teat_length	ENSBTAG00000016465	29	48930324	48950644	protein_coding	0.0451486	Gall_Bladder; Diaphragm; Corpus_Luteum
DHX32	Teat_length	ENSBTAG00000005795	26	45676602	45731188	protein_coding	0.0856715	Testes; Esophagus; Skin
DNM3	Teat_length	ENSBTAG00000014319	16	40118745	40472474	protein_coding	0.102517	Sperm; Fetus_Brain; Brain
EPS8L2	Teat_length	ENSBTAG00000022147	29	50933806	50949800	protein_coding	0.197558	Bulbourethral_gland; Kidney_Cortex; Esophagus
EXOC6B	Teat_length	ENSBTAG00000020799	11	11618055	12337148	protein_coding	0.991903	Sperm; Fetus_Brain; Brain
FAIM2	Teat_length	ENSBTAG00000017504	5	30155763	30185025	protein_coding	0.0124867	Midbrain; Cerebral_cortex; Diencephalon
FANK1	Teat_length	ENSBTAG00000022917	26	45731306	45840708	protein_coding	0.750272	Infundibulum; Testes; Ampulla
HABP2	Teat_length	ENSBTAG00000019322	26	34304685	34340148	protein_coding	0.0135868	Liver; Kidney_Cortex; Fetus_liver
HCFC2	Teat_length	ENSBTAG00000020933	5	68052161	68097172	protein_coding	0.116383	Sperm; Thymus; Cerebellum
KLHL42	Teat_length	ENSBTAG00000006372	5	82452437	82468701	protein_coding	0.0182525	Ileum; Uterine_myometrium; Mammary
LMNTD2	Teat_length	ENSBTAG00000047713	29	51036147	51077863	protein_coding	0.0788955	Testes; Pineal_gland; bladder
MRGPRG	Teat_length	ENSBTAG00000031271	29	49026020	49026889	protein_coding	0.0182415	Lymph_nodes; Adrenal; Lung
MRPS35	Teat_length	ENSBTAG00000006369	5	82486885	82530466	protein_coding	0.0229775	RumenPapillae; Descending_Colon; Diaphragm
MYOCD	Teat_length	ENSBTAG00000035706	19	31767278	31822920	protein_coding	0.0864397	Aorta; Trachea; Sperm
NADSYN1	Teat_length	ENSBTAG00000016470	29	48955480	48983276	protein_coding	0.0751437	Ileum; Pineal_gland; bladder
NCKAP5L	Teat_length	ENSBTAG00000004851	5	30251225	30262563	protein_coding	0.638155	Fetus_testes; Adipose; Aorta
NFYB	Teat_length	ENSBTAG00000030744	5	68109725	68127878	protein_coding	0.0116016	Sperm; Fetus_muscle; Fetus_Kidney
SHANK2	Teat_length	ENSBTAG00000003171	29	48217044	48378574	protein_coding	0.0178577	Mammary; Fetus_Brain; Frontal_cortex
SIGIRR	Teat_length	ENSBTAG00000011149	29	51265567	51271520	protein_coding	0.0761587	CD4_cell; Kidney_Cortex; CD8_cell
STAB2	Teat_length	ENSBTAG00000006010	5	67612447	67784730	protein_coding	0.270689	Lymph_nodes; Fetus_liver; Adrenal
SUCO	Teat_length	ENSBTAG00000010169	16	40904879	40973025	protein_coding	0.188159	Epididymis; Thyroid; Testes
TDRD1	Teat_length	ENSBTAG00000006855	26	34947479	34985364	protein_coding	0.0277908	Testes; Sperm; Fetus_testes
TMTC2	Teat_length	ENSBTAG00000002888	5	12460330	12563124	protein_coding	1	Sperm; Uterine_myometrium; Fetus_muscle
TMTC2	Teat_length	ENSBTAG00000002888	5	12460330	12563124	protein_coding	0.999777	Sperm; Uterine_myometrium; Fetus_muscle
TSPAN4	Teat_length	ENSBTAG00000019369	29	50560713	50570675	protein_coding	0.0721384	Isthmus; Pons; Vesicular_gland
UROS	Teat_length	ENSBTAG00000005791	26	45635844	45660024	protein_coding	0.0677547	Fetus_liver; Pineal_gland; Testes
VWA2	Teat_length	ENSBTAG00000006860	26	35006215	35047805	protein_coding	0.929158	SME; Posterior_pituitary; Pineal_gland
ZNF613	Teat_length	ENSBTAG00000038487	18	58130465	58141877	protein_coding	0.187131	Thyroid; Thymus; Skin
OSR1	Udder_cleft	ENSBTAG00000008113	11	79487139	79494238	protein_coding	0.236173	Trachea; Aorta; Fornix_vagina
PUM2	Udder_cleft	ENSBTAG00000011155	11	78579476	78666984	protein_coding	0.0129718	White_blood_cells; Fetus_Brain; Thymus
VEPH1	Udder_cleft	ENSBTAG00000024643	1	110986517	111211551	protein_coding	0.998651	Sperm; Thyroid; Kidney_Cortex
ABCC9	Udder_depth	ENSBTAG00000019294	5	88677586	88831324	protein_coding	1	Sperm; Fetus_muscle; Endometrium
ANKS1A	Udder_depth	ENSBTAG00000016890	23	8838316	9004998	protein_coding	0.0247778	Trachea; Ampulla; Infundibulum
ARHGAP39	Udder_depth	ENSBTAG00000007186	14	1563866	1600378	protein_coding	0.0883145	Infundibulum; Frontal_cortex; Ampulla
ARRDC3	Udder_depth	ENSBTAG00000007116	7	93240419	93253094	protein_coding	0.557827	Uterine_myometrium; Spleen; White_blood_cells
CPSF1	Udder_depth	ENSBTAG00000008355	14	1728207	1742670	protein_coding	0.0259831	Fetus_testes; CD4_cell; CD8_cell
CYHR1	Udder_depth	ENSBTAG00000035254	14	1663923	1677519	protein_coding	0.0122234	Testes; Larynx_cartilage; Isthmus
DGAT1	Udder_depth	ENSBTAG00000026356	14	1795351	1804562	protein_coding	0.0147666	Bone_marrow; Adipose; Jejunum
FANCC	Udder_depth	ENSBTAG00000017195	8	83023629	83270596	protein_coding	0.799987	Sperm; Thyroid; Endometrium
FOXH1	Udder_depth	ENSBTAG00000004761	14	1654701	1656256	protein_coding	0.0144353	Testes; Sperm; Fetus_testes
GC	Udder_depth	ENSBTAG00000013718	6	88695940	88739180	protein_coding	0.686455	Fetus_liver; Liver; Fetus_Kidney
GPT	Udder_depth	ENSBTAG00000007835	14	1623903	1626907	protein_coding	0.0595051	RumenPapillae; Rumen; Esophagus
HSF1	Udder_depth	ENSBTAG00000020751	14	1806081	1825793	protein_coding	0.0112396	Chorid_plexus; Muscle; Larynx_cartilage
IGF2	Udder_depth	ENSBTAG00000013066	29	50046626	50065230	protein_coding	0.401556	Fetus_muscle; Fetus_Kidney; Fetus_liver
KIFC2	Udder_depth	ENSBTAG00000007753	14	1656950	1663804	protein_coding	0.0459301	Frontal_cortex; Cerebral_cortex; Hippocampus
LSP1	Udder_depth	ENSBTAG00000010447	29	50238211	50276209	protein_coding	0.999942	CD8_cell; CD4_cell; Lymphocyte
MYH10	Udder_depth	ENSBTAG00000021151	19	28680825	28800880	protein_coding	0.995611	Trachea; Aorta; Rumen_ephthelial_cell
PPP1R16A	Udder_depth	ENSBTAG00000007834	14	1628814	1633988	protein_coding	0.0432022	Infundibulum; Pineal_gland; Ileum
RECQL4	Udder_depth	ENSBTAG00000010276	14	1614027	1620509	protein_coding	0.0913423	Ileum; CD8_cell; Fetus_liver
SLC52A2	Udder_depth	ENSBTAG00000000857	14	1763994	1766621	protein_coding	0.015857	Gall_Bladder; Diaphragm; Fetus_testes
TCP11	Udder_depth	ENSBTAG00000016891	23	9020184	9052477	protein_coding	0.97441	Testes; Sperm; Epididymis
TONSL	Udder_depth	ENSBTAG00000007749	14	1681494	1692498	protein_coding	0.0820378	CD4_cell; CD8_cell; Ileum
VPS28	Udder_depth	ENSBTAG00000026320	14	1693641	1698490	protein_coding	0.0176362	Bulbourethral_gland; Pons; Isthmus
